# Supplementary material for: Integrating C–H activation/2-fold annulation: a modular access to heteroaryl-tethered oxazoloisoquinolinones
Source: Royal Society of Chemistry journal article supplement (doi:10.1039/d4cc06123c), 2024-12-19

Supporting Information

**Integrating C-H activation/ 2-fold annulation: a modular access to heteroaryl-tethered oxazoloisoquinolinones**

**Table of Contents**

|    |                                                                                     |         |
|----|-------------------------------------------------------------------------------------|---------|
| 1  | General Information                                                                 | S2      |
| 2  | Optimization Studies                                                                | S3      |
| 3  | General Procedure for the Preparation of (Hetero)aryl Oxazolines                    | S4-S5   |
| 4  | Procedure for the Preparation of Optically Pure <b>1n'-o'</b>                       | S5      |
| 5  | General Procedure for the Preparation of <i>N</i> -fused 1,2,3-triazoles            | S5-S7   |
| 6  | General Procedure for Rh(III)-Catalyzed C-H Activation/2-fold Annulation            | S7      |
| 7  | Procedures for the Scale-up Synthesis and Post-Synthetic Modifications              | S7-S8   |
| 8  | Photophysical Experiment Details                                                    | S9      |
| 9  | Crystal Data and Structure Refinement for <b>3f</b>                                 | S10-S11 |
| 10 | HPLC Chromatograms                                                                  | S11-S15 |
| 11 | Characterization Data                                                               | S15-S38 |
| 12 | Mechanistic Investigation                                                           | S39-S42 |
| 13 | References                                                                          | S43     |
| 14 | NMR ( <sup>1</sup> H, <sup>13</sup> C, <sup>19</sup> F and <sup>31</sup> P) Spectra | S44-S97 |

**General Information.** [Cp\*RhCl<sub>2</sub>]<sub>2</sub> (>97%), Rh<sub>2</sub>(OAc)<sub>4</sub> (>98%), AgOAc (≥99.99%), Cu(OAc)<sub>2</sub> (>98%), KOAc, NaOAc, CsOAc, Na<sub>2</sub>CO<sub>3</sub>, 2,2,2-trifluoroethanol (TFE) and 1,1,1,3,3,3-hexafluoro-2-propanol (HFIP) of Aldrich and TCI Chemicals were used as received. Methanol, 1,2-dichloroethane, toluene and tetrahydrofuran were dried prior to use as per the standard procedure. Merck silica gel G/GF254 plates were used for analytical thin-layer chromatography (TLC). Column chromatography was carried out using Rankem silica gel (100-200 mesh). Bruker Avance III 400, 500 and 600 MHz NMR spectrometers were used to record spectra using CDCl<sub>3</sub> as the solvent and tetramethylsilane (Me<sub>4</sub>Si) as an internal standard. Chemical shifts ( $\delta$ ) and spin-spin coupling constant ( $J$ ) are reported in parts per million and hertz (Hz), respectively, and to describe peak patterns following abbreviations were used when appropriate: s = singlet, d = doublet, t = triplet, q = quartet, dd = double doublet, m = multiplet. Melting points were determined using a Büchi B-540 apparatus and are uncorrected. FT-IR spectra were recorded on a PerkinElmer FT-IR spectrometer. Quadrupole time-of-flight electrospray ionization (ESI) mass spectrometer (Agilent 6546) was used for recording HRMS. Single crystal X-ray data was collected on a Bruker SMART APEX equipped with a CCD area detector using Mo/K $\alpha$  radiation and the structure was solved by direct method using SHELXT-2018/2 (Göttingen, Germany).

**Tables S1.** Optimization of the Reaction Conditions<sup>a</sup>

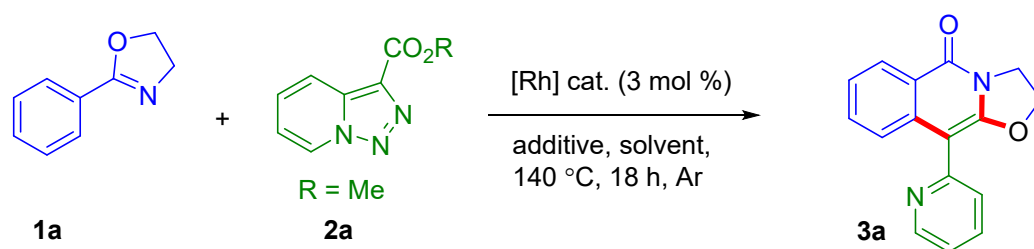

| entry           | catalyst (3 mol %)                                               | additive (50 mol %)       | solvent                    | yield (%) |
|-----------------|------------------------------------------------------------------|---------------------------|----------------------------|-----------|
| 1               | $[\text{Cp}^*\text{RhCl}_2]_2$                                   | AgOAc                     | TFE                        | 57        |
| 2               | $[\text{Cp}^*\text{RhCl}_2]_2$                                   | KOAc                      | TFE                        | 72        |
| <b>3</b>        | <b><math>[\text{Cp}^*\text{RhCl}_2]_2</math></b>                 | <b>NaOAc</b>              | <b>TFE</b>                 | <b>82</b> |
| 4               | $[\text{Cp}^*\text{RhCl}_2]_2$                                   | CsOAc                     | TFE                        | 55        |
| 5               | $[\text{Cp}^*\text{RhCl}_2]_2$                                   | $\text{Na}_2\text{CO}_3$  | TFE                        | n.d.      |
| 6               | $[\text{Cp}^*\text{RhCl}_2]_2$                                   | $\text{Cu}(\text{OAc})_2$ | TFE                        | trace     |
| 7               | $[\text{Cp}^*\text{RhCl}_2]_2$                                   | AcOH                      | TFE                        | 25        |
| 8               | $[\text{Cp}^*\text{RhCl}_2]_2$                                   | NaOAc                     | HFIP                       | 54        |
| 9               | $[\text{Cp}^*\text{RhCl}_2]_2$                                   | NaOAc                     | MeOH                       | 27        |
| 10              | $[\text{Cp}^*\text{RhCl}_2]_2$                                   | NaOAc                     | $\text{H}_2\text{O}$       | n.d.      |
| 11              | $[\text{Cp}^*\text{RhCl}_2]_2$                                   | NaOAc                     | $(\text{CH}_2\text{Cl})_2$ | trace     |
| 12              | $[\text{Cp}^*\text{RhCl}_2]_2$                                   | NaOAc                     | PhMe                       | n.d.      |
| 13              | $[\text{Cp}^*\text{RhCl}_2]_2$                                   | NaOAc                     | THF                        | n.d.      |
| 14              | $[\text{Cp}^*\text{Rh}(\text{CH}_3\text{CN})_3](\text{SbF}_6)_2$ | NaOAc                     | TFE                        | 59        |
| 15              | $\text{Rh}_2(\text{OAc})_4$                                      | NaOAc                     | TFE                        | n.d.      |
| 16 <sup>c</sup> | $[\text{Cp}^*\text{RhCl}_2]_2$                                   | NaOAc                     | TFE                        | 73        |
| 17 <sup>d</sup> | $[\text{Cp}^*\text{RhCl}_2]_2$                                   | NaOAc                     | TFE                        | 21        |
| 18 <sup>e</sup> | $[\text{Cp}^*\text{RhCl}_2]_2$                                   | NaOAc                     | TFE                        | 57        |
| 19              | $[\text{Cp}^*\text{RhCl}_2]_2$                                   | ---                       | TFE                        | 48        |
| 20              | ---                                                              | NaOAc                     | TFE                        | n.d.      |

<sup>a</sup>Reaction conditions: **1a** (0.2 mmol), **2a** (0.3 mmol),  $[\text{Rh}]$  (3 mol %), additive (50 mol %), solvent (1 mL),  $140\text{ }^\circ\text{C}$ , 18 h, Ar, pressure tube. <sup>b</sup>Isolated yield. <sup>c</sup>With **2a'** (when  $\text{R} = \text{Et}$ ). <sup>d</sup>Reaction at  $70\text{ }^\circ\text{C}$ . <sup>e</sup>Using 20 mol % NaOAc. n.d. = not detected.

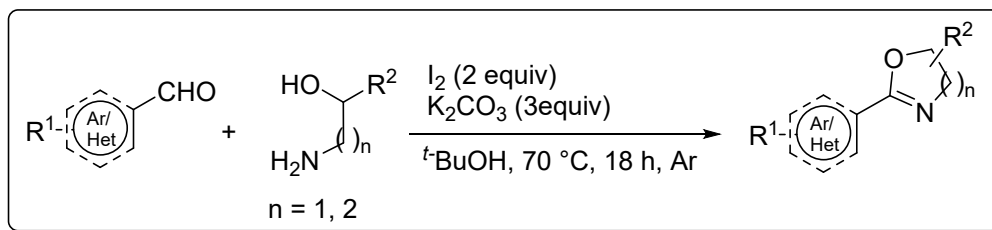

**General Procedure for the Preparation of Substrates 1a-p, 1r-t and 1A-C.**<sup>1b</sup> To a stirred solution of aldehyde (3 mmol) in *tert*-butyl alcohol (30 mL), amino alcohol (3.3 mmol, 1.1 equiv) was added. The resulting mixture was allowed to stir at room temperature for 30 min under argon atmosphere. Next,  $K_2CO_3$  (9 mmol, 3 equiv, 1.24 g) and  $I_2$  (6 mmol, 2 equiv, 1.51 g) were added and further stirred at the same temperature for 18 h. The progress of the reaction was monitored by TLC. Upon completion, the reaction mixture was allowed to cool and quenched with saturated aqueous  $Na_2S_2O_3$  until the color of iodine was disappeared. The mixture was extracted with EtOAc (2 x 20 mL). The combined organic layer was washed with brine (2 x 10 mL) and water (10 mL). Drying ( $Na_2SO_4$ ) and evaporation of the solvent gave a residue that was purified on silica gel column chromatography using *n*-hexane and ethyl acetate as an eluent to afford **1a-p, 1r-t and 1A-C**.

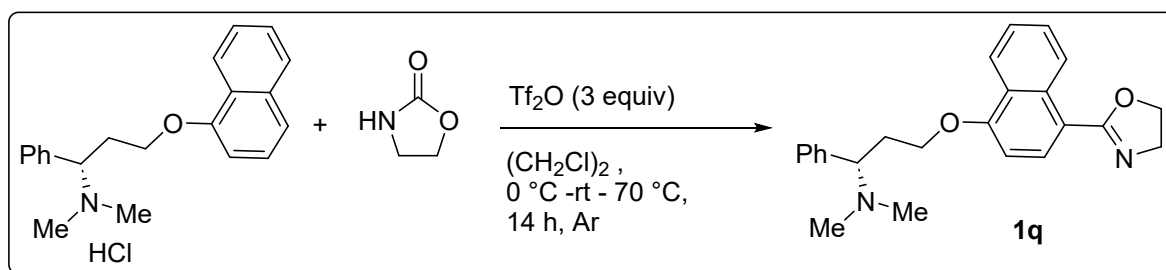

**Preparation of (S)-3-((4-(4,5-Dihydrooxazol-2-yl)naphthalen-1-yl)oxy)-N,N-dimethyl-1-phenylpropan-1-amine 1q.**<sup>1j</sup> To a stirred solution of oxazolidin-2-one (6 mmol, 3 equiv, 522 mg) in  $(CH_2Cl)_2$  (8 mL), trifluoromethanesulfonic anhydride (6 mmol, 3 equiv, 1 mL) was added dropwise over 5 min *via* syringe at 0 °C under argon atmosphere. The resulting solution was allowed to warm to room temperature and continued the stirring for an additional 20 min under the same temperature. Then, solution of (*S*)-*N,N*-dimethyl-3-(naphthalen-1-yloxy)-1-phenylpropan-1-amine hydrochloride (2 mmol, 1 equiv, 684 mg) in  $(CH_2Cl)_2$  (2 mL) was added dropwise to the reaction mixture within 1 min and the resultant solution was stirred at 70 °C in a preheated oil bath for 14 h. Upon completion, monitored by TLC, the reaction mixture was allowed to cool to room temperature, and quenched with saturated aqueous  $K_2CO_3$  and extracted with EtOAc (2 x 20 mL). The combined organic layer was washed with brine (2 x 10

mL) and water (10 mL). Drying ( $\text{Na}_2\text{SO}_4$ ) and evaporation of the solvent gave a residue that was purified on silica gel column chromatography using *n*-hexane and ethyl acetate (70/30, v/v) as an eluent to afford **1q** in 65% (486 mg) yield.

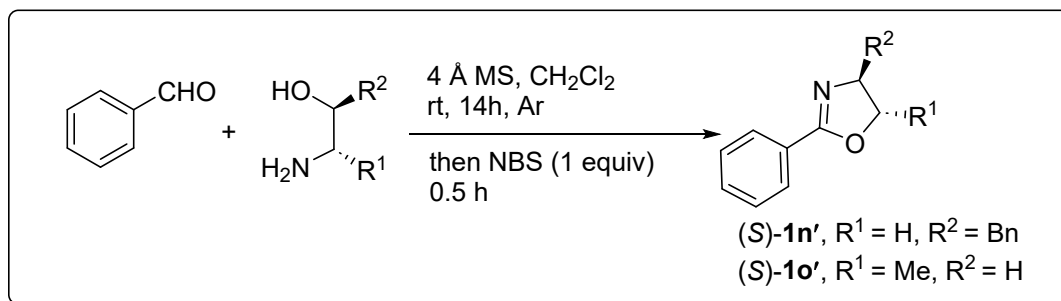

**Procedure for the Preparation of Optically Pure Substrates 1n'-o'.**<sup>1a</sup> To a stirred solution of optically pure (*S*)-amino alcohol (3 mmol, 1 equiv) in CH<sub>2</sub>Cl<sub>2</sub> (15 mL), benzaldehyde (3 mmol, 1 equiv, 0.3 mL) was added. The resulting mixture was allowed to stir at room temperature over 4 Å molecular sieves (4.5 g) for 14 h under argon atmosphere. Next, *N*-bromosuccinimide (3 mmol, 1 equiv, 531 mg) was added and further stirred at the same temperature for 0.5 h. Upon completion (monitored by TLC), the reaction mixture was filtered and the filtrate was washed with saturated aqueous NaHCO<sub>3</sub> (2 x 20 mL). The mixture was extracted with CH<sub>2</sub>Cl<sub>2</sub> (2 x 20 mL). The combined organic layer was washed with brine (2 x 20 mL) and water (10 mL). Drying ( $\text{Na}_2\text{SO}_4$ ) and evaporation of the solvent gave a residue that was purified on silica gel column chromatography using *n*-hexane and ethyl acetate as an eluent to afford **1n'-o'**.

Substrates **1l** and **1r-t** are new, the complete characterization data are provided whereas **1a-k**,<sup>1b,d-f,h</sup> **1m-q**<sup>1c,i-j</sup>, **1A-C**<sup>1c-d</sup> and **1n'-o'**<sup>1a,g</sup> are known, synthesized according to the reported procedure.

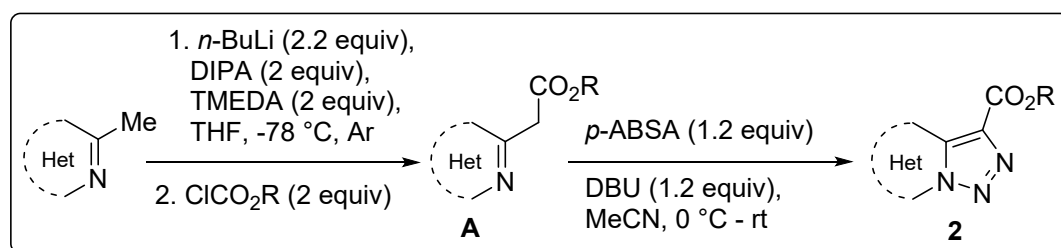

**General Procedure for the Preparation of Substrates 2a-b, 2d-e and 2h-j.**<sup>2b</sup> To a stirred solution of diisopropylamine (10 mmol, 2 equiv, 1.01g) in THF (20 mL), *n*-BuLi (11 mmol, 5.5 mL, 2M in hexane) was added dropwise at -78 °C and continued the stirring for 10 min

under argon atmosphere. The mixture was allowed to warm to 0 °C and further stirred for 30 min. Then, the solution of 2-methyl substituted *N*-heterocycles (5 mmol) in THF (10 mL) was added dropwise to the mixture at -78 °C for 10 min. *N,N,N',N'*-Tetramethylethylenediamine (10 mmol, 2equiv, 1.16 g) was then added and continued the stirring for 1 h at the same temperature. Corresponding alkyl chloroformate (10 mmol) was then added slowly and warmed to room temperature. Upon completion, monitored by TLC, the resultant mixture was quenched with H<sub>2</sub>O and extracted using EtOAc (2 x 20 mL). The combined organic layer was washed with brine (2 x 10 mL) and water (10 mL). Drying (Na<sub>2</sub>SO<sub>4</sub>) and evaporation of the solvent gave a residue that was purified on silica gel column chromatography using *n*-hexane and ethyl acetate as an eluent to afford the ester **A**.

To the stirred solution of corresponding ester **A** (3 mmol) and *p*-acetamidobenzenesulfonyl azide (3.6 mmol, 864 mg) in CH<sub>3</sub>CN (10 mL), 1,8-diazabicyclo[5.4.0]undec-7-ene (3.6 mmol, 537 μL) was added at 0 °C. The mixture was allowed to cool to room temperature and stirred for an appropriate time (10-12 h). The progress of reaction was monitored by TLC. Upon completion, the resultant mixture was quenched with saturated aqueous NH<sub>4</sub>Cl solution and extracted with EtOAc (3 x 20 mL). The combined organic layer was washed with brine (2 x 10 mL) and water (10 mL). Drying (Na<sub>2</sub>SO<sub>4</sub>) and evaporation of the solvent gave a residue that was purified on silica gel column chromatography using *n*-hexane and ethyl acetate as an eluent to afford the corresponding (hetero)-aryl *N*-fused 1,2,3-triazoles **2**.

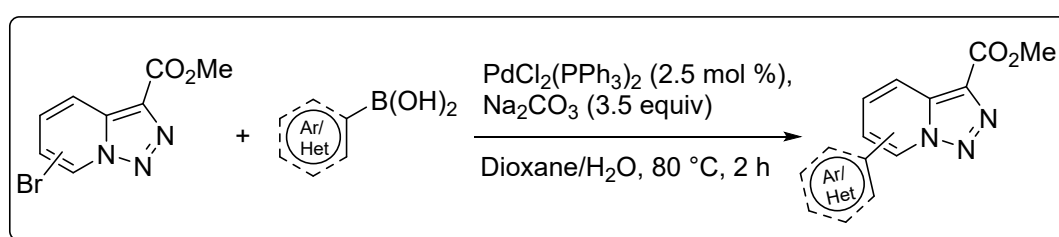

**General Procedure for the Preparation of Pyridotriazoles 2c, 2f-g and 2k.**<sup>2b</sup> Bromo-substituted pyridotriazoles (1 mmol), (hetero)aryl boronic acid (1.3 mmol), PdCl<sub>2</sub>(PPh<sub>3</sub>)<sub>2</sub> (2.5 mol %, 0.025 mmol, 18 mg) and Na<sub>2</sub>CO<sub>3</sub> (3.5 mmol, 3.5 equiv, 371 mg) were stirred in dioxane/H<sub>2</sub>O (10:10, v/v) at 80 °C in a preheated oil bath for 2 h under argon atmosphere. Upon completion, monitored by TLC, the resultant mixture was quenched with saturated aqueous NH<sub>4</sub>Cl solution and extracted with EtOAc (3 x 20 mL). The combined organic layer was washed with brine (2 x 10 mL) and water (10 mL). Drying (Na<sub>2</sub>SO<sub>4</sub>) and evaporation of the

solvent gave a residue that was purified on silica gel column chromatography using *n*-hexane and ethyl acetate as an eluent to afford the substituted pyridotriazoles **2c**, **2f-g** and **2k**.

Substrates **2c**, **2f-g** and **2k** are new, the complete characterization data are provided whereas **2a-b**,<sup>2b-c</sup> **2d-e**<sup>2b</sup> and **2h-j**<sup>2a-b</sup> are known, synthesized according to the reported procedure.

**General Procedure for Rh(III)-Catalyzed C-H Activation/2-fold Annulation.** In an oven-dried pressure tube, a mixture of aryl-/heteroaryl-oxazoline **1** (0.2 mmol), heteroaryl *N*-fused 1,2,3-triazole **2** (0.3 mmol, 1.5 equiv), [Cp\*RhCl<sub>2</sub>]<sub>2</sub> (3 mol %, 0.006 mmol, 3.70 mg), NaOAc (0.1 mmol, 0.5 equiv, 8.2 mg) in TFE (1 mL) was stirred at 140 °C for 18 h under argon atmosphere. The progress of the reaction was monitored by TLC utilizing acetone and CH<sub>2</sub>Cl<sub>2</sub> as an eluent. Upon completion, the resulting solution was cooled to room temperature, diluted with ethyl acetate (10 mL) and passed through a short celite pad. The filtrate was concentrated under reduced pressure and the residue was purified on silica gel column chromatography using acetone and CH<sub>2</sub>Cl<sub>2</sub> as an eluent to afford the annulated product **3**.

**Scale-up Synthesis of 3g.** In an oven-dried pressure tube, a mixture of 2-(4-bromophenyl)-4,5-dihydrooxazole **1g** (3 mmol, 674 mg), methyl [1,2,3]triazolo[1,5-*a*]pyridine-3-carboxylate **2a** (4.5 mmol, 1.5 equiv, 796 mg), [Cp\*RhCl<sub>2</sub>]<sub>2</sub> (3 mol %, 0.09 mmol, 55 mg), NaOAc (1.5 mmol, 0.5 equiv, 123 mg) in TFE (10 mL) was stirred at 140 °C for 18 h under argon atmosphere. The progress of the reaction was monitored by TLC utilizing acetone and CH<sub>2</sub>Cl<sub>2</sub> as an eluent. Upon completion, the resulting solution was cooled to room temperature, diluted with ethyl acetate (20 mL) and passed through a short celite pad. The filtrate was concentrated under reduced pressure and the residue was purified on silica gel column chromatography using acetone and CH<sub>2</sub>Cl<sub>2</sub> (10/90, v/v) as an eluent to afford the annulated product **3g** in 64% (0.65 g) yield.

**Synthesis of 4.**<sup>2b</sup> To an oven-dried round bottom flask, a mixture of compound **3g** (0.1 mmol, 34 mg), phenyl boronic acid (0.13 mmol, 1.3 equiv, 16 mg), PdCl<sub>2</sub>(PPh<sub>3</sub>)<sub>2</sub> (2.5 mol %, 0.0025 mmol, 1.75 mg) and Na<sub>2</sub>CO<sub>3</sub> (0.35 mmol, 3.5 equiv, 37 mg) in dioxane/H<sub>2</sub>O (1:1, v/v) was stirred at 80 °C in a preheated oil bath for 2 h under argon atmosphere. Upon completion, monitored by TLC, the resulting mixture was quenched with saturated aqueous NH<sub>4</sub>Cl solution and extracted with EtOAc (3 x 10 mL). The combined organic layer was washed with brine (2 x 5 mL) and water (1 x 5 mL). Drying (Na<sub>2</sub>SO<sub>4</sub>) and evaporation of the solvent gave a residue

that was purified on silica gel column chromatography using acetone and CH<sub>2</sub>Cl<sub>2</sub> (15/85, v/v) as an eluent to afford **4** in 86% (29 mg) yield.

**Synthesis of 5.**<sup>3</sup> In an oven-dried pressure tube, a mixture of **3g** (0.1 mmol, 34 mg), phenylacetylene (0.2 mmol, 2 equiv, 20.4 mg), PdCl<sub>2</sub>(PPh<sub>3</sub>)<sub>2</sub> (10 mol %, 0.01 mmol, 7.0 mg), CuI (0.01 mmol, 10 mol %, 1.9 mg) and Et<sub>3</sub>N (0.5 mmol, 5 equiv, 70 μL) in DMF (1 mL) was stirred at 60 °C in a preheated oil bath for 30 h under argon atmosphere. Upon completion, monitored by TLC, the resulting mixture was quenched with H<sub>2</sub>O and extracted with EtOAc (3 x 10 mL). The combined organic layer was washed with brine (2 x 5 mL) and water (1 x 5 mL). Drying (Na<sub>2</sub>SO<sub>4</sub>) and evaporation of the solvent gave a residue that was purified on silica gel column chromatography using acetone and CH<sub>2</sub>Cl<sub>2</sub> (15/85, v/v) as an eluent to afford **5** in 88% (32 mg) yield.

**Synthesis of 6.**<sup>4</sup> To an oven-dried round bottom flask, a mixture of compound **3g** (0.1 mmol, 34 mg), diethyl phosphite (0.1 mmol, 1 equiv, 14 mg), Pd(OAc)<sub>2</sub> (5 mol %, 0.005 mmol, 1 mg), dppf (0.01 mmol, 10 mol %, 6 mg), NaOAc (0.012 mmol, 12 mol %, 1 mg) and DIPEA (0.12 mmol, 1.2 equiv, 16 mg) in THF (1 mL) was stirred at 70 °C in a preheated oil bath for 24 h under argon atmosphere. Upon completion, monitored by TLC, the resulting solution was cooled to room temperature, diluted with ethyl acetate (10 mL) and passed through a short celite pad. The filtrate was concentrated under reduced pressure and the residue was purified on silica gel column chromatography using acetone and CH<sub>2</sub>Cl<sub>2</sub> (25/75, v/v) as an eluent to afford the phosphorylated **6** in 73% (29 mg) yield.

**Synthesis of 7.**<sup>3</sup> To an oven-dried round bottom flask, a mixture of compound **3g** (0.1 mmol, 34 mg), B<sub>2</sub>pin<sub>2</sub> (0.4 mmol, 4 equiv, 101 mg), Pd(dppf)Cl<sub>2</sub> (10 mol %, 0.01 mmol, 7.3 mg) and KOAc (0.5 mmol, 5 equiv, 49 mg) in dioxane (1 mL) was stirred at 90 °C in a preheated oil bath for 12 h under argon atmosphere. Upon completion, monitored by TLC, the resulting solution was cooled to room temperature, diluted with ethyl acetate (10 mL) and passed through a short celite pad. The filtrate was concentrated under reduced pressure and the residue was purified on silica gel column chromatography using acetone and CH<sub>2</sub>Cl<sub>2</sub> (20/80, v/v) as an eluent to afford the borylated **7** in 75% (29 mg) yield.



**Photophysical Experiment Details:** Absorption and emission spectra of some synthesized compounds were recorded in CH<sub>2</sub>Cl<sub>2</sub> (1.0 x 10<sup>-5</sup> M) at ambient temperature. The absorption and emission wavelengths are listed in the following.

| entry | compound name | $\lambda_{\text{abs}}$ (nm) | $\lambda_{\text{em}}$ (nm) |
|-------|---------------|-----------------------------|----------------------------|
| 1     | <b>3m</b>     | 405                         | 487                        |
| 2     | <b>3s</b>     | 381                         | 460                        |
| 3     | <b>3t</b>     | 380                         | 459                        |
| 4     | <b>3x</b>     | 345                         | 406                        |
| 5     | <b>3l</b>     | 371                         | 443                        |

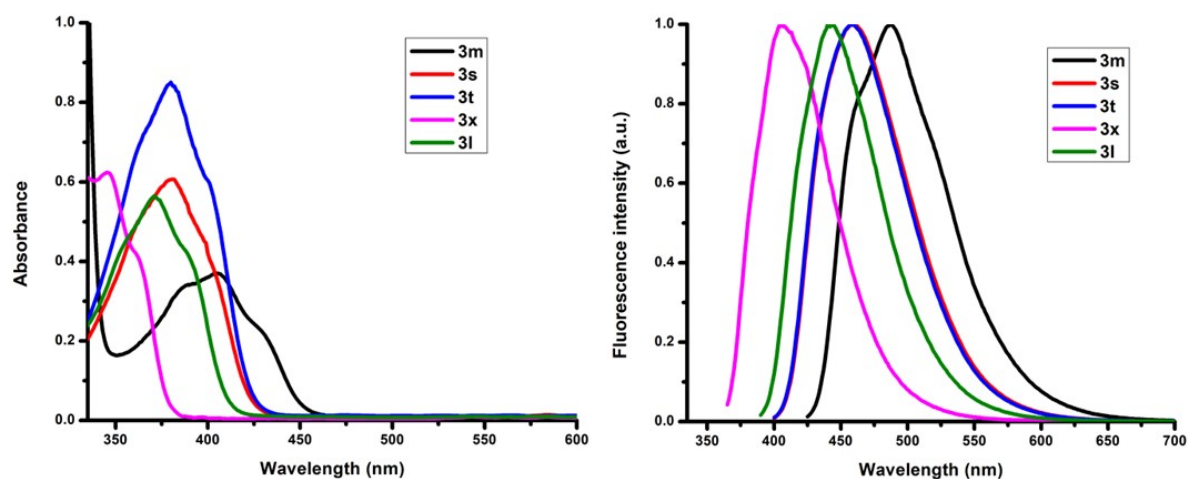

**Figure S1:** Normalized absorption (left) and emission (right) spectra of **3m**, **3s**, **3t**, **3x** and **3l** in CH<sub>2</sub>Cl<sub>2</sub> (1.0 x 10<sup>-5</sup> M)

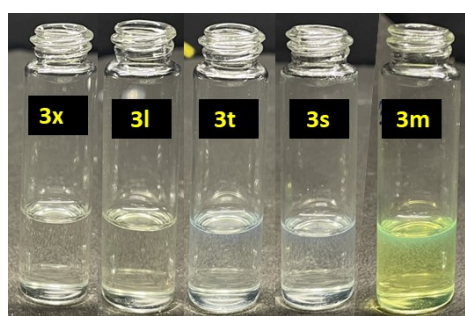

under ambient light

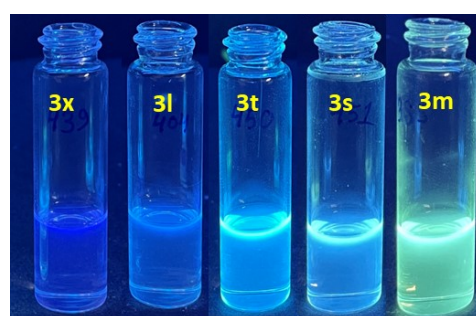

under UV light

**Figure S2:** Fluorescence behaviour

**Sample Preparation for Crystal Growth.** The compound **3f** was dissolved in 1 mL of CH<sub>2</sub>Cl<sub>2</sub>/hexane(1:5) solution and kept at room temperature for slow evaporation (3 days). The block shaped crystal was then subjected to X-ray diffraction.

### Crystal Data and Structure Refinement for **3f**

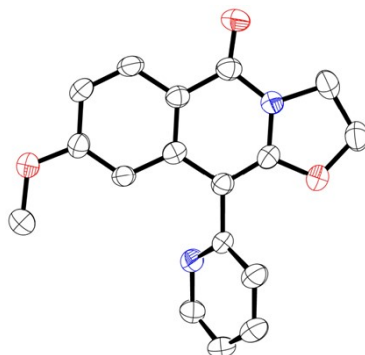

**Figure S3.** ORTEP diagram of 8-Methoxy-10-(pyridin-2-yl)-2,3-dihydro-5*H*-oxazolo[3,2-*b*]isoquinolin-5-one **3f** with 50% ellipsoid (CCDC 2382549). H-Atoms are omitted for clarity.

|                                              |                                                                                                                                                                   |
|----------------------------------------------|-------------------------------------------------------------------------------------------------------------------------------------------------------------------|
| Identification code                          | <b>3f</b>                                                                                                                                                         |
| Empirical formula                            | C <sub>17</sub> H <sub>14</sub> N <sub>2</sub> O <sub>3</sub>                                                                                                     |
| Formula weight                               | 294.30                                                                                                                                                            |
| Crystal habit, color                         | block and colorless                                                                                                                                               |
| Temperature, <i>T</i> /K                     | 297 K                                                                                                                                                             |
| Wavelength, $\lambda$ /Å                     | 0.71073                                                                                                                                                           |
| Crystal system                               | triclinic                                                                                                                                                         |
| Space group                                  | 'P -1'                                                                                                                                                            |
| Unit cell dimensions                         | $a = 8.7677(7) \text{ \AA}$<br>$b = 9.1717(8) \text{ \AA}$<br>$c = 10.1712(9) \text{ \AA}$<br>$\alpha = 64.119(2)$<br>$\beta = 76.342(2)$<br>$\gamma = 77.008(2)$ |
| Volume, $V/\text{\AA}^3$                     | 708.10(11)                                                                                                                                                        |
| <i>Z</i>                                     | 2                                                                                                                                                                 |
| Calculated density, g·cm <sup>-3</sup>       | 1.380                                                                                                                                                             |
| Absorption coefficient, $\mu/\text{mm}^{-1}$ | 0.096                                                                                                                                                             |

|                                        |                                                              |
|----------------------------------------|--------------------------------------------------------------|
| $F(000)$                               | 308                                                          |
| $\theta$ range for data collection     | 2.414 to 24.998 °                                            |
| Limiting indices                       | $-10 \leq h \leq 10, -10 \leq k \leq 10, -12 \leq l \leq 12$ |
| Reflection collected / unique          | 2456 / 1921                                                  |
| Completeness to $\theta$               | 98.40% ( $\theta = 24.998^\circ$ )                           |
| Absorption correction                  | multi-scan                                                   |
| Refinement method                      | 'SHELXT 2018/2 (Sheldrick, 2018)'                            |
| Data / restraints / parameters         | 2456/0/200                                                   |
| Goodness-of-fit on $F^2$               | 1.189                                                        |
| Final $R$ indices [ $I > 2\sigma(I)$ ] | $R1 = 0.0605, wR2 = 0.1097$                                  |
| $R$ indices (all data)                 | $R1 = 0.0819, wR2 = 0.1161$                                  |

## HPLC Chromatograms

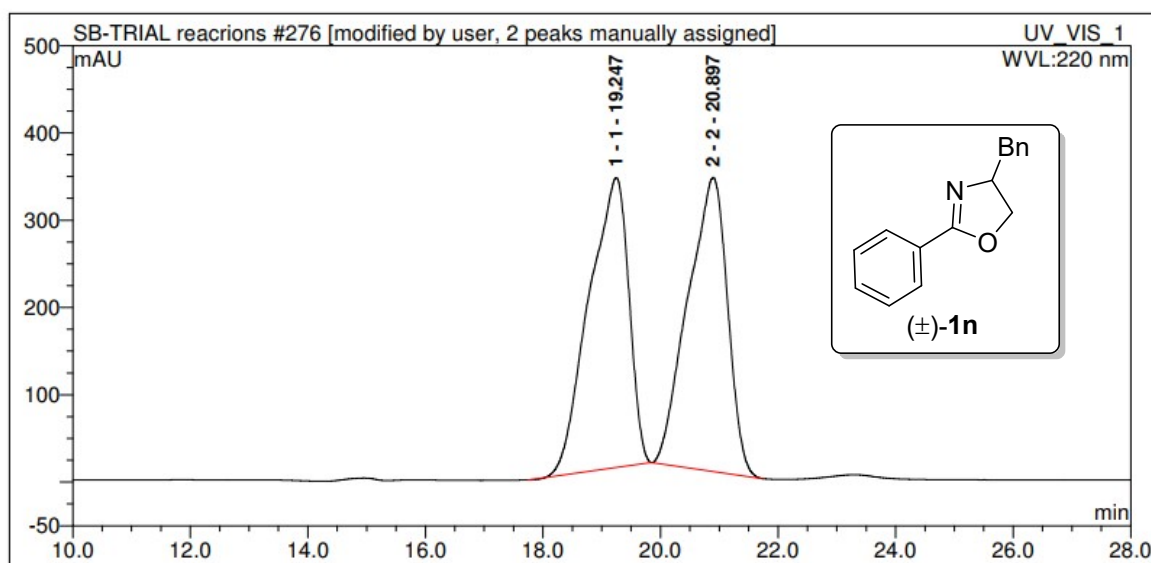

| No. | Peak Name | Ret.Time (detected)<br>min | Area<br>mAU*min | Rel.Area(ident.)<br>% | Height<br>mAU | Amount |
|-----|-----------|----------------------------|-----------------|-----------------------|---------------|--------|
| 1   | 1         | 19.24666667                | 261.9296        | 49.89092209           | 331.9948      | n.a.   |
| 2   | 2         | 20.89666667                | 263.0749        | 50.10907791           | 336.9269      | n.a.   |

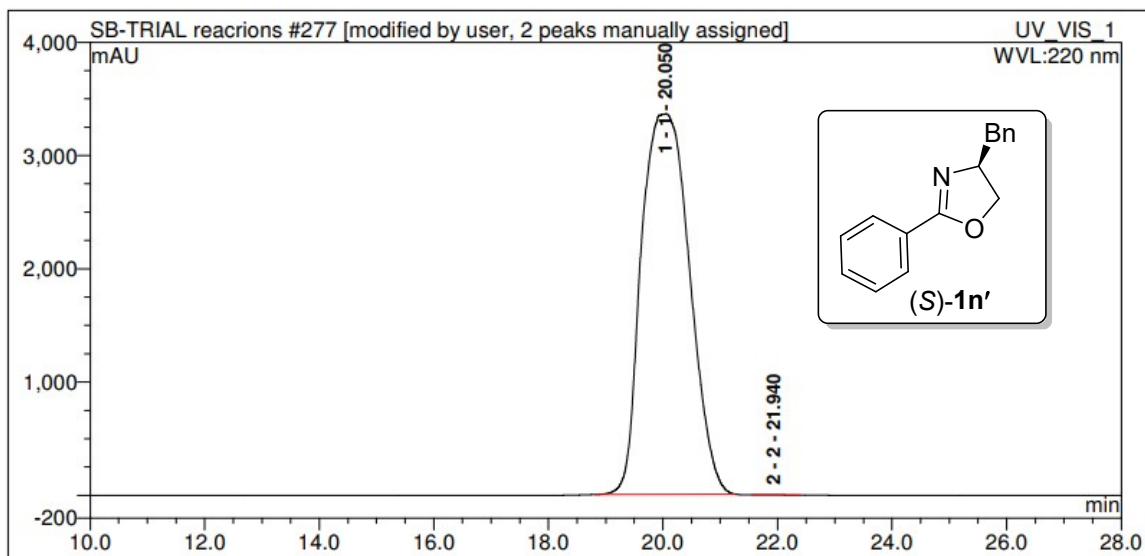

| No. | Peak Name | Ret.Time (detected)<br>min | Area<br>mAU*min | Rel.Area(ident.)<br>% | Height<br>mAU | Amount |
|-----|-----------|----------------------------|-----------------|-----------------------|---------------|--------|
| 1   | 1         | 20.05                      | 3271.526        | 99.98327              | 3362.91       | n.a.   |
| 2   | 2         | 21.94                      | 0.547418        | 0.01672999907         | 1.13897       | n.a.   |

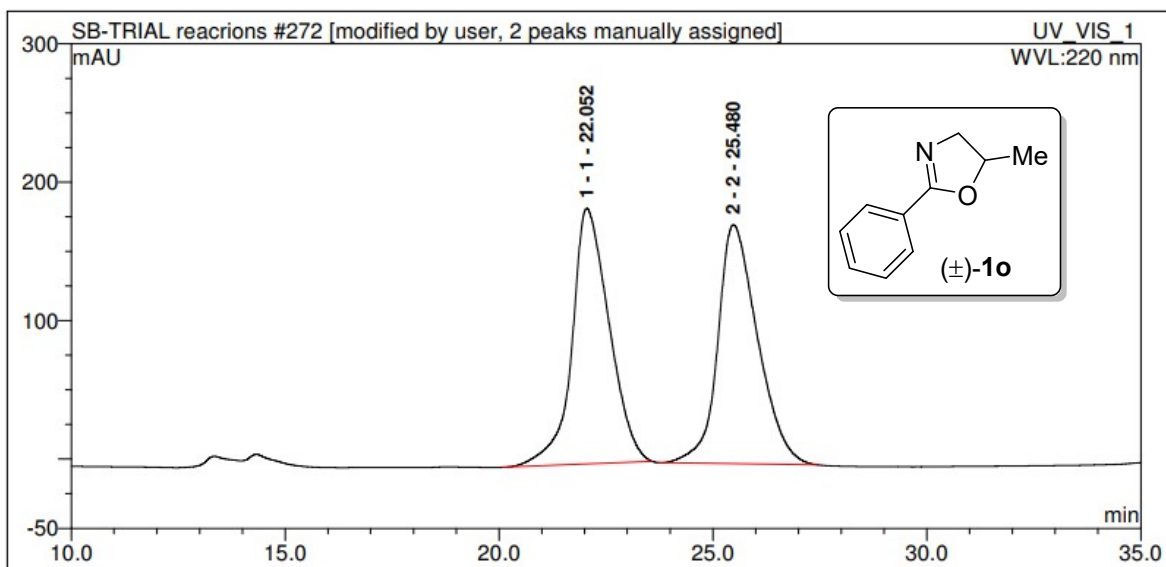

| No. | Peak Name | Ret.Time (detected)<br>min | Area<br>mAU*min | Rel.Area(ident.)<br>% | Height<br>mAU | Amount |
|-----|-----------|----------------------------|-----------------|-----------------------|---------------|--------|
| 1   | 1         | 22.05166667                | 186.4346        | 50.0064691            | 184.5683      | n.a.   |
| 2   | 2         | 25.48                      | 186.3864        | 49.9935309            | 172.5919      | n.a.   |

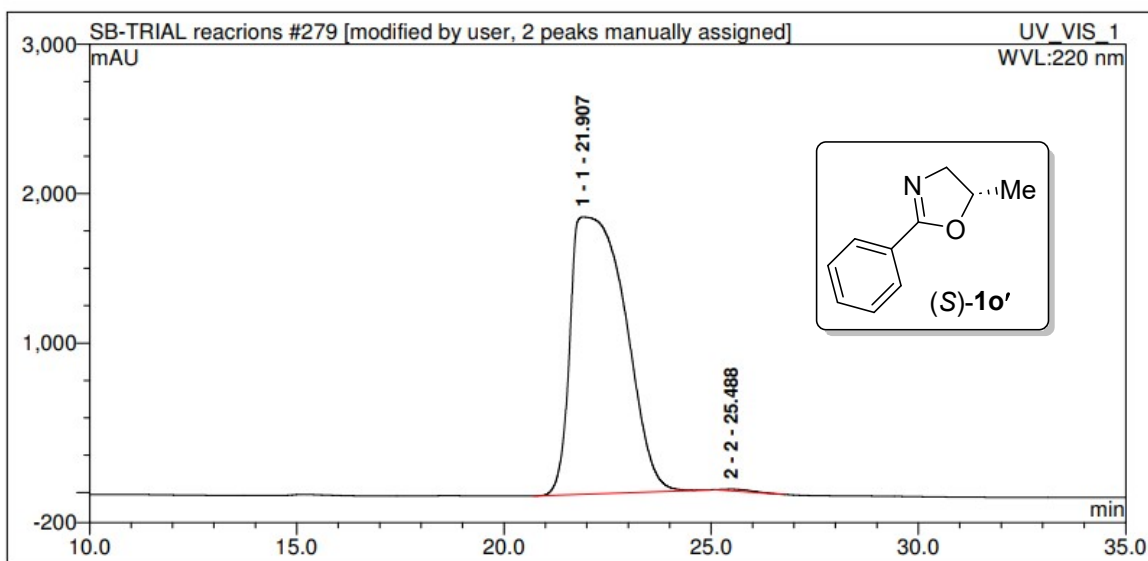

| No. | Peak Name | Ret.Time (detected)<br>min | Area<br>mAU*min | Rel.Area(ident.)<br>% | Height<br>mAU | Amount |
|-----|-----------|----------------------------|-----------------|-----------------------|---------------|--------|
| 1   | 1         | 21.90666667                | 2843.078        | 99.63984724           | 1854.372      | n.a.   |
| 2   | 2         | 25.48833333                | 10.27643        | 0.3601527569          | 11.53414      | n.a.   |

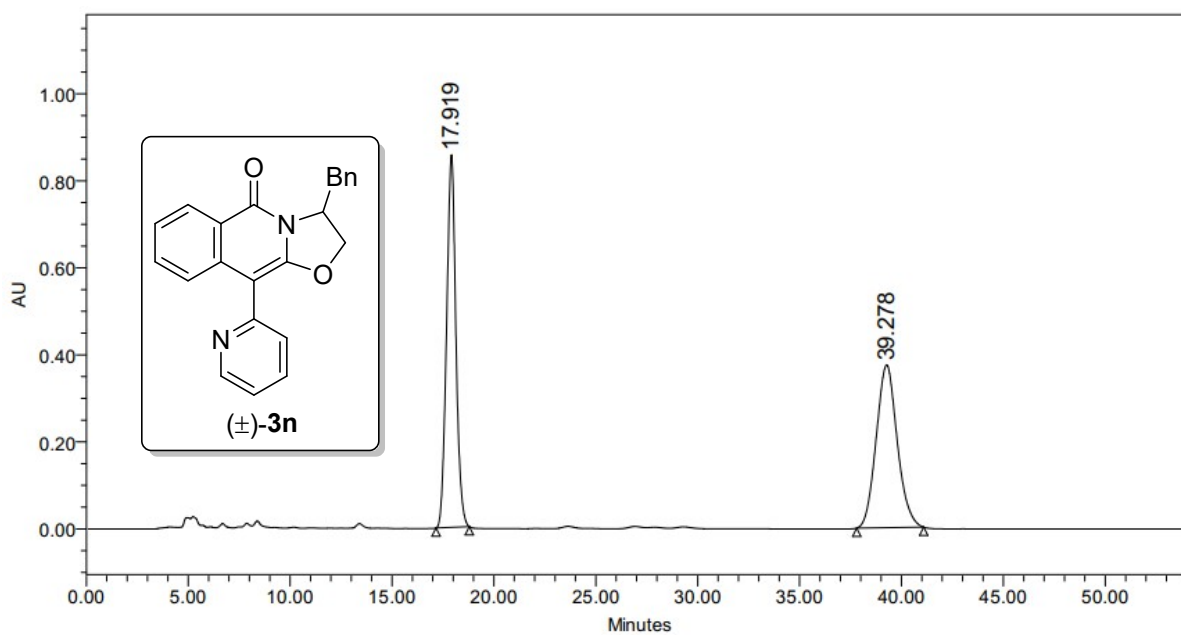

|   | RT     | Area     | % Area | Height |
|---|--------|----------|--------|--------|
| 1 | 17.919 | 27118746 | 50.23  | 856049 |
| 2 | 39.278 | 26871875 | 49.77  | 374223 |

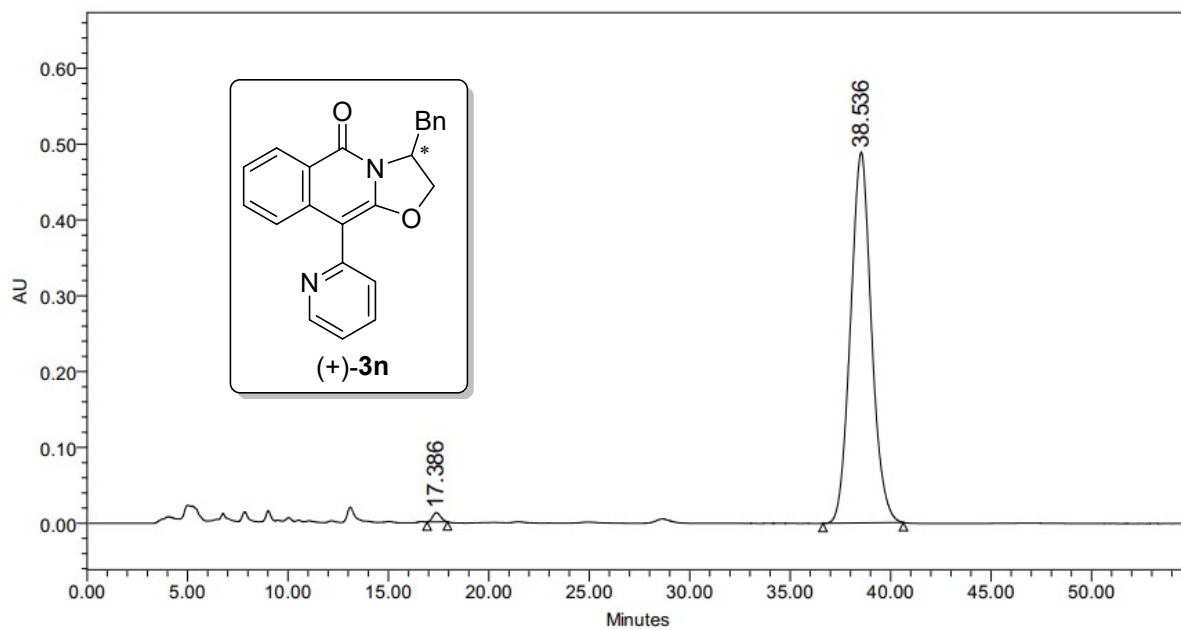

|   | RT     | Area     | % Area | Height |
|---|--------|----------|--------|--------|
| 1 | 17.386 | 337003   | 0.94   | 12233  |
| 2 | 38.536 | 35420037 | 99.06  | 489286 |

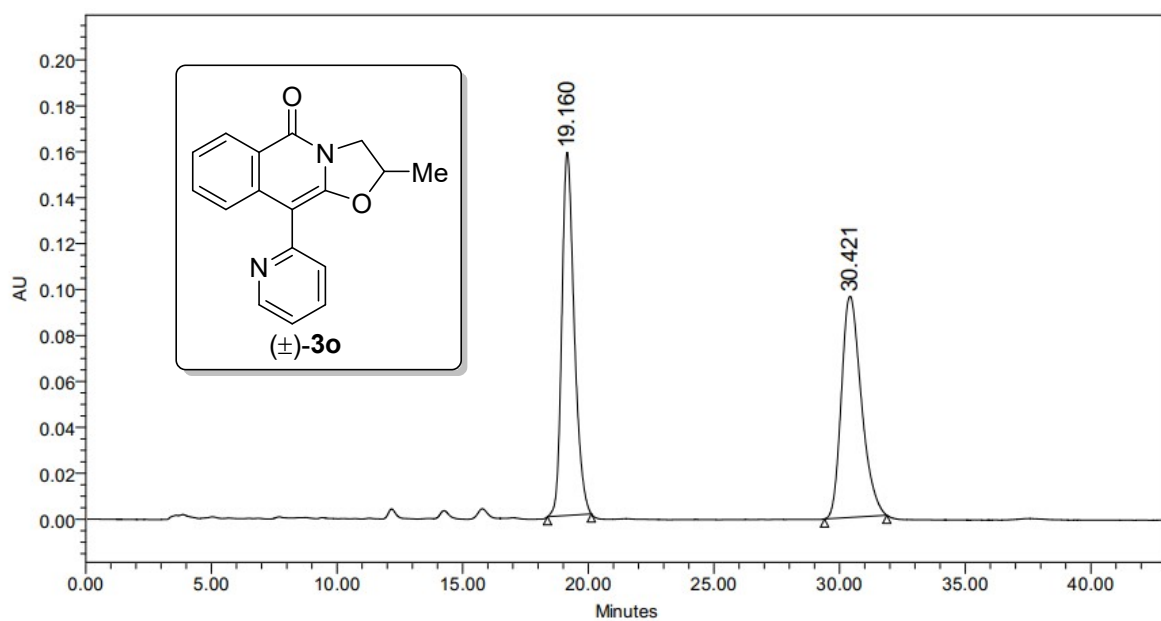

|   | RT     | Area    | % Area | Height |
|---|--------|---------|--------|--------|
| 1 | 19.160 | 5433569 | 50.55  | 158077 |
| 2 | 30.421 | 5314729 | 49.45  | 96289  |

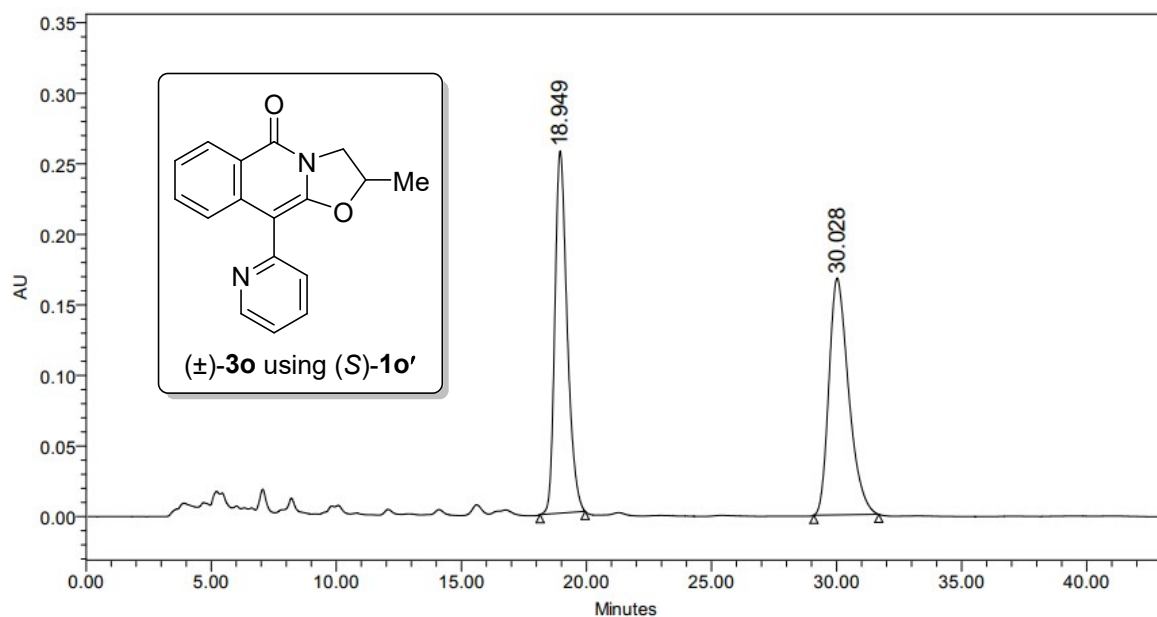

|   | RT     | Area    | % Area | Height |
|---|--------|---------|--------|--------|
| 1 | 18.949 | 8778292 | 48.84  | 256668 |
| 2 | 30.028 | 9196816 | 51.16  | 167797 |

### Characterization Data of 2-Aryloxazolines

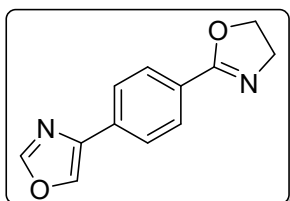

**4-(4-(4,5-Dihydrooxazol-2-yl)phenyl)oxazole 1l.** Analytical TLC on silica gel, 1:3 ethyl acetate/hexane  $R_f = 0.45$ ; light yellow solid; mp 150-151 °C; yield 72% (462 mg);  $^1\text{H NMR}$  (600 MHz,  $\text{CDCl}_3$ )  $\delta$  8.00 (d,  $J = 7.8$  Hz, 2H), 7.95 (s, 1H), 7.71 (d,  $J = 8.4$  Hz, 2H), 7.44 (s, 1H), 4.45 (t,  $J = 9.6$  Hz, 2H), 4.08 (t,  $J = 9.6$  Hz, 2H);  $^{13}\text{C NMR}$  (150 MHz,  $\text{CDCl}_3$ )  $\delta$  164.2, 151.0, 150.9, 130.3, 128.9, 127.8, 124.2, 122.9, 67.8, 55.0; FT-IR (KBr) 2924, 1645, 1484, 1412, 1357, 1317, 1261, 1071, 940, 830  $\text{cm}^{-1}$ ; HRMS (ESI)  $m/z$   $[\text{M}+\text{H}]^+$  calcd for  $\text{C}_{12}\text{H}_{11}\text{N}_2\text{O}_2$ : 215.0815, found 215.0818.

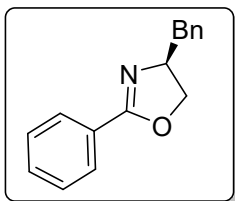

**(S)-4-Benzyl-2-phenyl-4,5-dihydrooxazole 1n'**.<sup>1a</sup> Analytical TLC on silica gel, 1:4 ethyl acetate/hexane  $R_f = 0.48$ ; colorless liquid; yield 75% (533 mg);  $^1\text{H NMR}$  (600 MHz,  $\text{CDCl}_3$ )  $\delta$  8.00 (d,  $J = 7.8$  Hz, 2H), 7.52 (t,  $J = 7.8$  Hz, 1H), 7.45 (t,  $J = 7.8$  Hz, 2H), 7.35 (t,  $J = 7.8$  Hz, 2H), 7.30-7.27 (m, 3H), 4.65-4.60 (m, 1H), 4.39 (t,  $J = 9.0$  Hz, 1H), 4.18 (t,  $J = 7.8$  Hz, 1H), 3.29 (dd,  $J = 13.8, 5.4$  Hz, 1H), 2.78 (dd,  $J = 13.8, 9.0$  Hz, 1H);  $^{13}\text{C NMR}$  (150 MHz,  $\text{CDCl}_3$ )  $\delta$  164.1, 138.1, 131.4, 129.3, 128.6, 128.4, 128.3, 127.9, 126.6, 71.9, 68.0, 41.9;  $[\alpha]_{\text{D}}^{24.7} = +26.72$  ( $c = 1.27$ , MeOH); HPLC: >99% ee [CHIRALPAK ID, hexane/*i*PrOH = 98:2, flow rate: 0.5 mL/min,  $\lambda = 220$  nm,  $t_R = 20.05$  min (major), 21.94 min (minor)].

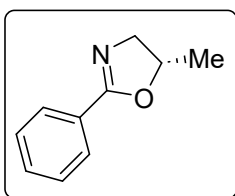

**(S)-5-Methyl-2-phenyl-4,5-dihydrooxazole 1o'**.<sup>1g</sup> Analytical TLC on silica gel, 1:4 ethyl acetate/hexane  $R_f = 0.50$ ; colorless liquid; yield 73% (352 mg);  $^1\text{H NMR}$  (600 MHz,  $\text{CDCl}_3$ )  $\delta$  7.94 (d,  $J = 7.8$  Hz, 2H), 7.45 (t,  $J = 7.8$  Hz, 1H), 7.39 (t,  $J = 7.8$  Hz, 2H), 4.86-4.80 (m, 1H), 4.13 (dd,  $J = 14.4, 9.0$  Hz, 1H), 3.60 (dd,  $J = 14.4, 7.2$  Hz, 1H), 1.41 (d,  $J = 6.0$  Hz, 3H);  $^{13}\text{C NMR}$  (150 MHz,  $\text{CDCl}_3$ )  $\delta$  163.9, 131.2, 128.3, 128.1, 76.3, 61.7, 21.2.  $[\alpha]_{\text{D}}^{24.6} = +25.40$  ( $c = 0.50$ ,  $\text{CHCl}_3$ ); HPLC: >99% ee [CHIRALPAK IC, hexane/*i*PrOH = 96:4, flow rate: 0.5 mL/min,  $\lambda = 220$  nm,  $t_R = 21.90$  min (major), 25.48 min (minor)].

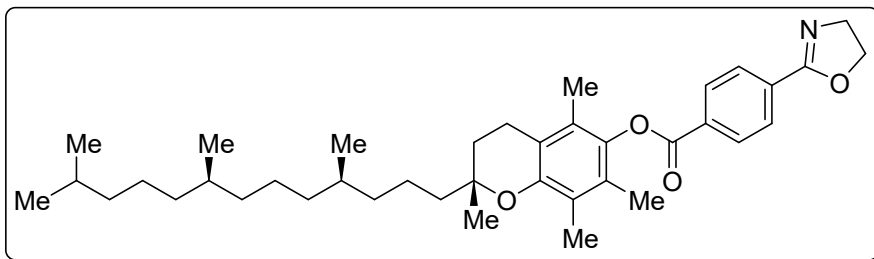

**(R)-2,5,7,8-**

**Tetramethyl-2-((4R,8R)-4,8,12-trimethyltridecyl)chroman-6-yl 4-(4,5-dihydrooxazol-2-yl)benzoate 1r**. Analytical TLC on silica gel, 1:4 ethyl acetate/hexane  $R_f = 0.55$ ; colorless solid; mp 95-96 °C; yield 70% (1.3 g);  $^1\text{H NMR}$  (600 MHz,  $\text{CDCl}_3$ )  $\delta$  8.28 (d,  $J = 8.4$  Hz, 2H), 8.09 (d,  $J = 8.4$  Hz, 2H), 4.49 (t,  $J = 9.6$  Hz, 2H), 4.12 (t,  $J = 9.6$  Hz, 2H), 2.62 (t,  $J = 6.6$  Hz,



2H), 2.12 (s, 3H), 2.05 (s, 3H), 2.01 (s, 3H), 1.86-1.76 (m, 2H), 1.61-1.49 (m, 2H), 1.46-1.35 (m, 3H), 1.31-1.20 (m, 12H), 1.15-1.05 (m, 7H), 0.87-0.84 (m, 12H);  $^{13}\text{C}$  NMR (150 MHz,  $\text{CDCl}_3$ )  $\delta$  164.7, 164.0, 149.7, 140.6, 132.3, 132.0, 130.2, 128.4, 126.9, 125.1, 123.3, 117.6, 75.2, 68.0, 55.2, 39.5, 37.7, 37.6, 37.59, 37.53, 37.4, 32.9, 32.8, 28.1, 24.96, 24.95, 24.5, 22.8, 22.7, 21.1, 20.7, 19.89, 19.83, 19.81, 19.78, 19.74, 13.2, 12.3, 12.0; FT-IR (KBr) 2924, 1734, 1649, 1457, 1235, 1087, 941, 865, 707  $\text{cm}^{-1}$ ; HRMS (ESI)  $m/z$   $[\text{M}+\text{H}]^+$  calcd for  $\text{C}_{39}\text{H}_{58}\text{NO}_4$ : 604.4360, found 604.4365.

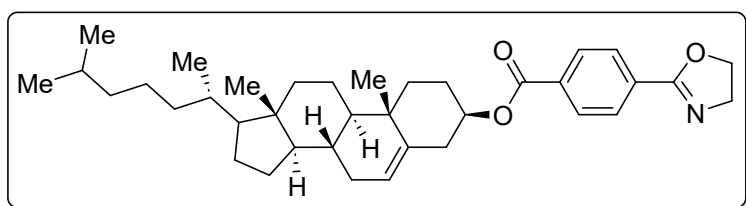

**(3R,8R,9R,10S,13S,14R)-10,13-**

**Dimethyl-17-((S)-6-methylheptan-2-yl)-2,3,4,7,8,9,10,11,12,13,14,15,16,17-**

**tetradecahydro-1H-cyclopenta[a]phenanthren-3-yl 4-(4,5-dihydrooxazol-2-yl)benzoate**

**1s.** Analytical TLC on silica gel, 1:4 ethyl acetate/hexane  $R_f$  = 0.48; colorless solid; mp 184-185  $^{\circ}\text{C}$ ; yield 65% (1.1 g);  $^1\text{H}$  NMR (600 MHz,  $\text{CDCl}_3$ )  $\delta$  8.08 (d,  $J$  = 8.4 Hz, 2H), 8.00 (d,  $J$  = 8.4 Hz, 2H), 5.42-5.41 (m, 1H), 4.89-4.84 (m, 1H), 4.46 (t,  $J$  = 9.6 Hz, 2H), 4.09 (t,  $J$  = 9.6 Hz, 2H), 2.47 (d,  $J$  = 7.8 Hz, 2H), 2.04-1.96 (m, 3H), 1.93-1.90 (m, 1H), 1.86-1.80 (m, 1H), 1.78-1.71 (m, 2H), 1.54-1.44 (m, 6H), 1.39-1.32 (m, 2H), 1.29-1.25 (m, 2H), 1.21-1.09 (m, 6H), 1.06 (s, 3H), 1.03-0.96 (m, 3H), 0.92 (d,  $J$  = 6.6 Hz, 3H), 0.87-0.85 (m, 6H), 0.68 (s, 3H);  $^{13}\text{C}$  NMR (150 MHz,  $\text{CDCl}_3$ )  $\delta$  165.5, 164.1, 139.7, 133.3, 131.6, 129.6, 128.2, 123.0, 75.1, 67.9, 56.8, 56.3, 55.1, 50.2, 42.4, 39.9, 39.6, 38.3, 37.1, 36.8, 36.3, 35.9, 32.09, 32.04, 28.3, 28.1, 28.0, 24.4, 23.9, 22.9, 22.7, 21.2, 19.5, 18.8, 12.0; FT-IR (KBr) 2933, 1713, 1649, 1461, 1366, 1271, 1112, 1069, 945, 708  $\text{cm}^{-1}$ ; HRMS (ESI)  $m/z$   $[\text{M}+\text{H}]^+$  calcd for  $\text{C}_{37}\text{H}_{54}\text{NO}_3$ : 560.4098, found 560.4095.

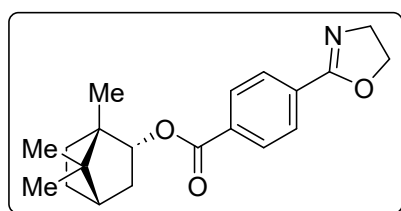

**1,7,7-Trimethylbicyclo[2.2.1]heptan-2-yl 4-(4,5-dihydro-**

**oxazol-2-yl)benzoate 1t.** Analytical TLC on silica gel, 1:4 ethyl acetate/hexane  $R_f$  = 0.45; brown solid; mp 106-107  $^{\circ}\text{C}$ ; yield 75% (736 mg);  $^1\text{H}$  NMR (600 MHz,  $\text{CDCl}_3$ )  $\delta$  8.08 (d,  $J$  = 7.8 Hz, 2H), 8.02 (d,  $J$  = 8.4 Hz, 2H), 5.13-5.11 (m, 1H), 4.47 (t,  $J$  = 9.6 Hz, 2H), 4.09 (t,  $J$  =

9.6 Hz, 2H), 2.50-2.45 (m, 1H), 2.14-2.10 (m, 1H), 1.83-1.78 (m, 1H), 1.75-1.73 (m, 1H), 1.44-1.39 (m, 1H), 1.34-1.27 (m, 1H), 1.14-1.11 (m, 1H), 0.96 (s, 3H), 0.91 (s, 6H);  $^{13}\text{C}$  NMR (150 MHz,  $\text{CDCl}_3$ )  $\delta$  166.3, 164.1, 133.3, 131.7, 129.6, 128.2, 81.1, 67.9, 55.2, 49.2, 48.0, 45.1, 37.0, 28.2, 27.5, 19.8, 19.0, 13.7; FT-IR (KBr) 2951, 1714, 1668, 1455, 1364, 1268, 1111, 1017, 867, 708  $\text{cm}^{-1}$ ; HRMS (ESI)  $m/z$   $[\text{M}+\text{H}]^+$  calcd for  $\text{C}_{20}\text{H}_{26}\text{NO}_3$ : 328.1907, found 328.1910.

### Characterization Data of Pyridotriazoles

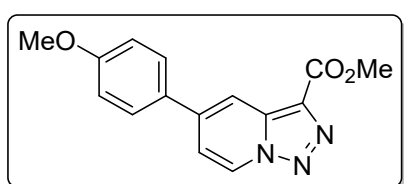

**Methyl 5-(4-methoxyphenyl)-[1,2,3]triazolo[1,5-a]pyridine-3-carboxylate 2c.** Analytical TLC on silica gel, 1:2 ethyl acetate/hexane  $R_f$  = 0.35; colorless solid; mp 155-156  $^{\circ}\text{C}$ ; yield 85% (240 mg);  $^1\text{H}$  NMR (400 MHz,  $\text{CDCl}_3$ )  $\delta$  8.83-8.81 (m, 1H), 8.37-8.36 (m, 1H), 7.68 (d,  $J$  = 8.8 Hz, 2H), 7.40-7.37 (m, 1H), 7.06 (d,  $J$  = 8.8 Hz, 2H), 4.06 (s, 3H), 3.89 (s, 3H);  $^{13}\text{C}$  NMR (150 MHz,  $\text{CDCl}_3$ )  $\delta$  162.1, 161.0, 142.4, 135.9, 129.4, 129.2, 128.6, 125.8, 116.3, 114.9, 114.4, 55.6, 52.2; FT-IR (KBr) 2948, 1720, 1606, 1526, 1450, 1255, 1201, 1070, 804  $\text{cm}^{-1}$ ; HRMS (ESI)  $m/z$   $[\text{M}+\text{H}]^+$  calcd for  $\text{C}_{15}\text{H}_{14}\text{N}_3\text{O}_3$ : 284.1030, found 284.1034.

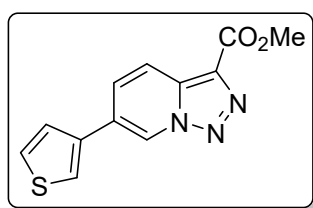

**Methyl 6-(thiophen-3-yl)-[1,2,3]triazolo[1,5-a]pyridine-3-carboxylate 2f.** Analytical TLC on silica gel, 1:2 ethyl acetate/hexane  $R_f$  = 0.53; colorless solid; mp 190-191  $^{\circ}\text{C}$ ; yield 73% (189 mg);  $^1\text{H}$  NMR (600 MHz,  $\text{CDCl}_3$ )  $\delta$  9.00 (s, 1H), 8.29 (d,  $J$  = 9.0 Hz, 1H), 7.81-7.79 (m, 1H), 7.638-7.631 (m, 1H), 7.53-7.52 (m, 1H), 7.42-7.41 (m, 1H), 4.05 (s, 3H);  $^{13}\text{C}$  NMR (150 MHz,  $\text{CDCl}_3$ )  $\delta$  161.9, 136.2, 134.1, 129.6, 129.4, 128.1, 126.1, 125.6, 123.1, 122.1, 119.1, 52.2; FT-IR (KBr) 2923, 1728, 1511, 1441, 1309, 1182, 722  $\text{cm}^{-1}$ ; HRMS (ESI)  $m/z$   $[\text{M}+\text{H}]^+$  calcd for  $\text{C}_{12}\text{H}_{10}\text{N}_3\text{O}_2\text{S}$ : 260.0488, found 260.0483.

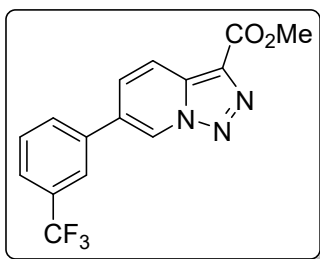

**Methyl 6-(3-(trifluoromethyl)phenyl)-[1,2,3]triazolo[1,5-*a*]pyridine-3-carboxylate 2g.** Analytical TLC on silica gel, 1:2 ethyl acetate/hexane  $R_f = 0.50$ ; colorless solid; mp 197-198 °C; yield 70% (225 mg);  $^1\text{H NMR}$  (600 MHz,  $\text{CDCl}_3$ )  $\delta$  9.02 (s, 1H), 8.38 (d,  $J = 9.0$  Hz, 1H), 7.88 (s, 1H), 7.83-7.79 (m, 2H), 7.77 (d,  $J = 7.8$  Hz, 1H), 7.69 (t,  $J = 7.8$  Hz, 1H), 4.07 (s, 3H);  $^{13}\text{C NMR}$  (150 MHz,  $\text{CDCl}_3$ )  $\delta$  161.8, 136.4, 134.4, 132.3 ( $J_{\text{C-F}} = 32.4$  Hz), 130.6, 130.3, 129.8, 129.7, 129.5, 126.0 ( $J_{\text{C-F}} = 3.4$  Hz), 124.7 ( $J_{\text{C-F}} = 271.0$  Hz), 124.3 ( $J_{\text{C-F}} = 3.7$  Hz), 123.3, 119.6, 52.3;  $^{19}\text{F NMR}$  (565 MHz,  $\text{CDCl}_3$ )  $\delta$  -62.74; FT-IR (KBr) 2922, 1703, 1457, 1334, 1269, 1175, 1110, 1075, 801  $\text{cm}^{-1}$ ; HRMS (ESI)  $m/z$   $[\text{M}+\text{H}]^+$  calcd for  $\text{C}_{15}\text{H}_{11}\text{F}_3\text{N}_3\text{O}_2$ : 322.0798, found 322.0799.

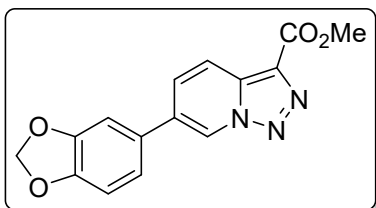

**Methyl 6-(benzo[*d*][1,3]dioxol-5-yl)-[1,2,3]triazolo[1,5-*a*]pyridine-3-carboxylate 2k.** Analytical TLC on silica gel, 1:2 ethyl acetate/hexane  $R_f = 0.40$ ; brown solid; mp 194-195 °C; yield 63% (187 mg);  $^1\text{H NMR}$  (600 MHz,  $\text{CDCl}_3$ )  $\delta$  8.90 (s, 1H), 8.29 (d,  $J = 9.0$  Hz, 1H), 7.74 (d,  $J = 9.0$  Hz, 1H), 7.10-7.08 (m, 2H), 6.96 (d,  $J = 7.8$  Hz, 1H), 6.06 (s, 2H), 4.06 (s, 3H);  $^{13}\text{C NMR}$  (150 MHz,  $\text{CDCl}_3$ )  $\delta$  161.9, 148.9, 148.8, 134.1, 131.0, 130.2, 129.4, 129.2, 122.3, 121.3, 119.0, 109.3, 107.6, 101.8, 52.3; FT-IR (KBr) 2922, 1722, 1481, 1237, 1037, 932, 809, 749  $\text{cm}^{-1}$ ; HRMS (ESI)  $m/z$   $[\text{M}+\text{H}]^+$  calcd for  $\text{C}_{15}\text{H}_{12}\text{N}_3\text{O}_4$ : 298.0822, found 298.0825.

## Characterization Data of the Products

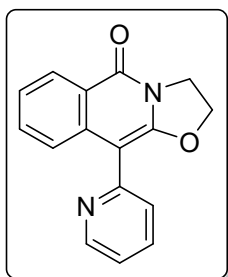

### 10-(Pyridin-2-yl)-2,3-dihydro-5H-oxazolo[3,2-b]isoquinolin-5-one **3a**.

Analytical TLC on silica gel, 1:5 acetone/CH<sub>2</sub>Cl<sub>2</sub> R<sub>f</sub> = 0.50; light yellow solid; mp 180-181 °C; yield 82% (43.2 mg); <sup>1</sup>H NMR (600 MHz, CDCl<sub>3</sub>) δ 8.76 (d, *J* = 4.2 Hz, 1H), 8.37 (d, *J* = 8.4 Hz, 1H), 7.80-7.77 (m, 1H), 7.64 (d, *J* = 8.4 Hz, 1H), 7.54-7.52 (m, 1H), 7.50 (d, *J* = 7.8 Hz, 1H), 7.33-7.30 (m, 1H), 7.28-7.27 (m, 1H), 4.70 (t, *J* = 8.4 Hz, 2H), 4.41 (t, *J* = 7.8 Hz, 2H); <sup>13</sup>C NMR (150 MHz, CDCl<sub>3</sub>) δ 160.2, 153.1, 150.1, 149.8, 138.3, 136.6, 132.9, 127.6, 126.4, 124.3, 123.6, 122.3, 122.0, 94.8, 68.2, 43.8; FT-IR (KBr) 2922, 2853, 1665, 1602, 1586, 1486, 1341, 1088, 1016, 983, 786, 764 cm<sup>-1</sup>; HRMS (ESI) *m/z* [M+H]<sup>+</sup> calcd for C<sub>16</sub>H<sub>13</sub>N<sub>2</sub>O<sub>2</sub>: 265.0972, found 265.0971.

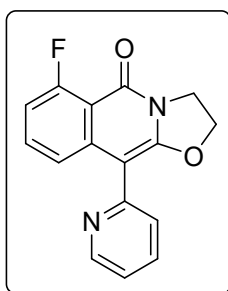

### 6-Fluoro-10-(pyridin-2-yl)-2,3-dihydro-5H-oxazolo[3,2-b]isoquinolin-5-one **3b**.

Analytical TLC on silica gel, 1:5 acetone/CH<sub>2</sub>Cl<sub>2</sub> R<sub>f</sub> = 0.47; brown solid; mp 200-201 °C; yield 70% (39 mg); <sup>1</sup>H NMR (600 MHz, CDCl<sub>3</sub>) δ 8.75 (d, *J* = 4.2 Hz, 1H), 7.79 (t, *J* = 7.8 Hz, 1H), 7.47 (d, *J* = 7.8 Hz, 1H), 7.44-7.40 (m, 1H), 7.33 (d, *J* = 7.8 Hz, 1H), 7.29-7.27 (m, 1H), 6.95-6.91 (m, 1H), 4.70 (t, *J* = 9.6 Hz, 2H), 4.38 (t, *J* = 8.4 Hz, 2H); <sup>13</sup>C NMR (150 MHz, CDCl<sub>3</sub>) δ 163.9 (*J*<sub>C-F</sub> = 261.1 Hz), 157.5 (*J*<sub>C-F</sub> = 3.9 Hz), 152.9, 150.8, 149.9, 141.3, 136.7, 133.6 (*J*<sub>C-F</sub> = 10.3 Hz), 126.5, 122.3, 119.3 (*J*<sub>C-F</sub> = 4.2 Hz), 111.6 (*J*<sub>C-F</sub> = 6.3 Hz), 111.0 (*J*<sub>C-F</sub> = 21.1 Hz), 94.2, 68.3, 43.8; <sup>19</sup>F NMR (565 MHz, CDCl<sub>3</sub>) δ -111.52; FT-IR (KBr) 2923, 2853, 1669, 1628, 1585, 1547, 1487, 1246, 1111, 1061, 808, 751 cm<sup>-1</sup>; HRMS (ESI) *m/z* [M+H]<sup>+</sup> calcd for C<sub>16</sub>H<sub>12</sub>FN<sub>2</sub>O<sub>2</sub>: 283.0877, found 283.0870.

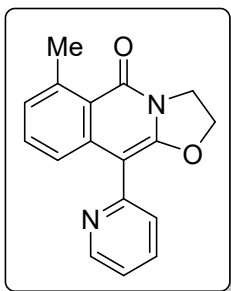

**6-Methyl-10-(pyridin-2-yl)-2,3-dihydro-5H-oxazolo[3,2-*b*]isoquinolin-**

**5-one 3c.** Analytical TLC on silica gel, 1:5 acetone/CH<sub>2</sub>Cl<sub>2</sub>  $R_f = 0.55$ ; light yellow solid; mp 160-161 °C; yield 81% (45 mg); <sup>1</sup>H NMR (600 MHz, CDCl<sub>3</sub>) δ 8.75 (d,  $J = 4.2$  Hz, 1H), 7.78 (t,  $J = 7.8$  Hz, 1H), 7.46 (d,  $J = 7.8$  Hz, 1H), 7.36-7.32 (m, 2H), 7.28-7.27 (m, 1H), 7.06 (d,  $J = 6.6$  Hz, 1H), 4.67 (t,  $J = 8.4$  Hz, 2H), 4.36 (t,  $J = 8.4$  Hz, 2H), 2.92 (s, 3H); <sup>13</sup>C NMR (150 MHz, CDCl<sub>3</sub>) δ 161.1, 153.7, 149.9, 149.7, 141.9, 140.3, 136.6, 131.9, 127.5, 126.6, 122.0, 121.7, 120.8, 94.7, 68.1, 43.9, 23.9; FT-IR (KBr) 2919, 2851, 1731, 1667, 1601, 1586, 1483, 1376, 1405, 1109, 1059, 802 cm<sup>-1</sup>; HRMS (ESI)  $m/z$  [M+H]<sup>+</sup> calcd for C<sub>17</sub>H<sub>15</sub>N<sub>2</sub>O<sub>2</sub>: 279.1128, found 279.1132.

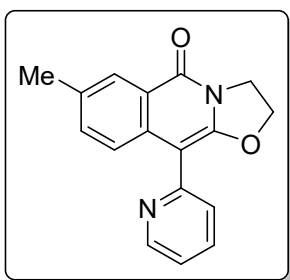

**7-Methyl-10-(pyridin-2-yl)-2,3-dihydro-5H-oxazolo[3,2-*b*]isoquinolin-5-one 3d.**

Analytical TLC on silica gel, 1:5 acetone/CH<sub>2</sub>Cl<sub>2</sub>  $R_f = 0.54$ ; colorless solid; mp 156-157 °C; yield 79% (43.9 mg); <sup>1</sup>H NMR (600 MHz, CDCl<sub>3</sub>) δ 8.76-8.74 (m, 1H), 8.17 (s, 1H), 7.78 (t,  $J = 7.8$  Hz, 1H), 7.56 (d,  $J = 7.8$  Hz, 1H), 7.50 (d,  $J = 7.8$  Hz, 1H), 7.37 (d,  $J = 8.4$  Hz, 1H), 7.27-7.25 (m, 1H), 4.69 (t,  $J = 7.8$  Hz, 2H), 4.41 (t,  $J = 7.8$  Hz, 2H), 2.43 (s, 3H); <sup>13</sup>C NMR (150 MHz, CDCl<sub>3</sub>) δ 160.2, 153.3, 149.7, 149.4, 136.5, 135.9, 134.4, 134.1, 127.1, 126.3, 123.5, 122.2, 121.9, 94.7, 68.1, 43.8, 21.1; FT-IR (KBr) 2921, 1662, 1629, 1586, 1499, 1468, 1434, 1348, 1104, 1017, 824, 609 cm<sup>-1</sup>; HRMS (ESI)  $m/z$  [M+H]<sup>+</sup> calcd for C<sub>17</sub>H<sub>15</sub>N<sub>2</sub>O<sub>2</sub>: 279.1128, found 279.1130.

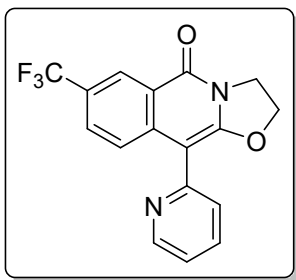

**10-(Pyridin-2-yl)-7-(trifluoromethyl)-2,3-dihydro-5H-oxazolo[3,2-*b*]isoquinolin-5-one 3e.** Analytical TLC on silica gel, 1:6 acetone/CH<sub>2</sub>Cl<sub>2</sub> *R<sub>f</sub>* = 0.56; colorless solid; mp 176-177 °C; yield 61% (40 mg); <sup>1</sup>H NMR (600 MHz, CDCl<sub>3</sub>) δ 8.77 (d, *J* = 4.8 Hz, 1H), 8.64 (s, 1H), 7.83-7.78 (m, 2H), 7.71-7.69 (m, 1H), 7.51 (d, *J* = 7.8 Hz, 1H), 7.31-7.29 (m, 1H), 4.76 (t, *J* = 8.4 Hz, 2H), 4.45 (t, *J* = 8.4 Hz, 2H); <sup>13</sup>C NMR (150 MHz, CDCl<sub>3</sub>) δ 159.6, 152.4, 151.8, 149.9, 141.0, 136.8, 128.9 (*J*<sub>C-F</sub> = 3.4 Hz), 126.4 (*J*<sub>C-F</sub> = 277.2 Hz), 126.1, 125.4 (*J*<sub>C-F</sub> = 4.3 Hz), 122.3, 121.9, 94.7, 68.6, 43.8; <sup>19</sup>F NMR (565 MHz, CDCl<sub>3</sub>) δ -62.22; FT-IR (KBr) 2922, 1670, 1626, 1586, 1507, 1469, 1435, 1325, 1166, 1121, 1017, 952 cm<sup>-1</sup>; HRMS (ESI) *m/z* [M+H]<sup>+</sup> calcd for C<sub>17</sub>H<sub>12</sub>F<sub>3</sub>N<sub>2</sub>O<sub>2</sub>: 333.0845, found 333.0848.

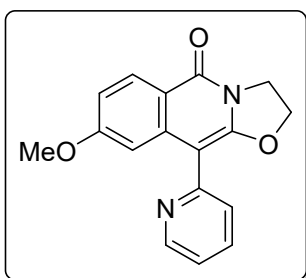

**8-Methoxy-10-(pyridin-2-yl)-2,3-dihydro-5H-oxazolo[3,2-*b*]isoquinolin-5-one 3f.** Analytical TLC on silica gel, 1:5 acetone/CH<sub>2</sub>Cl<sub>2</sub> *R<sub>f</sub>* = 0.42; colorless solid; mp 196-197 °C; yield 80% (47 mg); <sup>1</sup>H NMR (600 MHz, CDCl<sub>3</sub>) δ 8.76 (d, *J* = 4.2 Hz, 1H), 8.29 (d, *J* = 8.4 Hz, 1H), 7.80-7.77 (m, 1H), 7.51 (d, *J* = 7.8 Hz, 1H), 7.28-7.26 (m, 1H), 7.08-7.07 (m, 1H), 6.91 (dd, *J* = 9.0, 2.4 Hz, 1H), 4.69 (t, *J* = 8.4 Hz, 2H), 4.39 (t, *J* = 8.4 Hz, 2H), 3.77 (s, 3H); <sup>13</sup>C NMR (150 MHz, CDCl<sub>3</sub>) δ 163.4, 159.8, 153.3, 150.7, 149.7, 140.5, 136.6, 129.7, 126.4, 122.0, 116.2, 113.2, 105.6, 94.5, 68.3, 55.4, 43.7; FT-IR (KBr) 2923, 1661, 1606, 1489, 1469, 1434, 1339, 1235, 1111, 1021, 774, 683 cm<sup>-1</sup>; HRMS (ESI) *m/z* [M+H]<sup>+</sup> calcd for C<sub>17</sub>H<sub>15</sub>N<sub>2</sub>O<sub>3</sub>: 295.1077, found 295.1072.

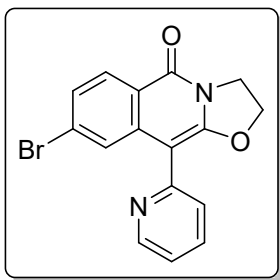

**8-Bromo-10-(pyridin-2-yl)-2,3-dihydro-5H-oxazolo[3,2-b]isoquinolin-5-one 3g.** Analytical TLC on silica gel, 1:5 acetone/CH<sub>2</sub>Cl<sub>2</sub> R<sub>f</sub> = 0.55; light yellow solid; mp 190-191 °C; yield 72% (49.2 mg); <sup>1</sup>H NMR (600 MHz, CDCl<sub>3</sub>) δ 8.77 (d, *J* = 4.8 Hz, 1H), 8.21 (d, *J* = 8.4 Hz, 1H), 7.81-7.79 (m, 2H), 7.49 (d, *J* = 7.8 Hz, 1H), 7.42 (d, *J* = 8.4 Hz, 1H), 7.30-7.28 (m, 1H), 4.72 (t, *J* = 8.4 Hz, 2H), 4.40 (t, *J* = 8.4 Hz, 2H); <sup>13</sup>C NMR (150 MHz, CDCl<sub>3</sub>) δ 159.7, 152.4, 151.0, 149.9, 139.8, 136.8, 129.3, 128.6, 127.6, 126.3, 126.2, 122.3, 120.9, 94.1, 68.4, 43.8; FT-IR (KBr) 2922, 1660, 1627, 1588, 1536, 1478, 1433, 1334, 1296, 1207, 1099, 865 cm<sup>-1</sup>; HRMS (ESI) *m/z* [M+H]<sup>+</sup> calcd for C<sub>16</sub>H<sub>12</sub>BrN<sub>2</sub>O<sub>2</sub>: 343.0077, found 343.0072.

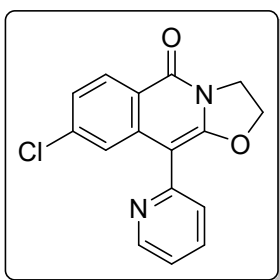

**8-Chloro-10-(pyridin-2-yl)-2,3-dihydro-5H-oxazolo[3,2-b]isoquinolin-5-one 3h.** Analytical TLC on silica gel, 1:5 acetone/CH<sub>2</sub>Cl<sub>2</sub> R<sub>f</sub> = 0.53; colorless solid; mp 195-196 °C; yield 70% (41.7 mg); <sup>1</sup>H NMR (600 MHz, CDCl<sub>3</sub>) δ 8.77 (d, *J* = 4.2 Hz, 1H), 8.29 (d, *J* = 8.4 Hz, 1H), 7.82-7.79 (m, 1H), 7.65 (s, 1H), 7.50 (d, *J* = 7.8 Hz, 1H), 7.30-7.27 (m, 2H), 4.72 (t, *J* = 8.4 Hz, 2H), 4.41 (t, *J* = 7.8 Hz, 2H); <sup>13</sup>C NMR (150 MHz, CDCl<sub>3</sub>) δ 159.6, 152.5, 151.1, 149.9, 139.75, 139.73, 136.8, 129.3, 126.3, 124.9, 123.2, 122.2, 120.6, 94.2, 68.4, 43.8; FT-IR (KBr) 2921, 1664, 1627, 1597, 1482, 1434, 1208, 1100, 948, 869 cm<sup>-1</sup>; HRMS (ESI) *m/z* [M+H]<sup>+</sup> calcd for C<sub>16</sub>H<sub>12</sub>ClN<sub>2</sub>O<sub>2</sub>: 299.0582, found 299.0586.

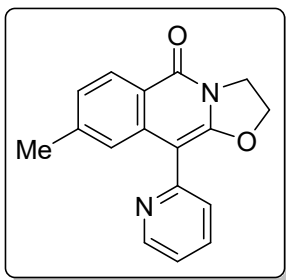

**8-Methyl-10-(pyridin-2-yl)-2,3-dihydro-5H-oxazolo[3,2-*b*]isoquinolin-5-one 3i.** Analytical TLC on silica gel, 1:5 acetone/CH<sub>2</sub>Cl<sub>2</sub> R<sub>f</sub> = 0.56; yellow solid; mp 150-151 °C; yield 77% (42.8 mg); <sup>1</sup>H NMR (600 MHz, CDCl<sub>3</sub>) δ 8.76 (d, *J* = 4.2 Hz, 1H), 8.25 (d, *J* = 7.8 Hz, 1H), 7.79 (t, *J* = 7.8 Hz, 1H), 7.49 (d, *J* = 7.8 Hz, 1H), 7.37 (s, 1H), 7.29-7.27 (m, 1H), 7.14 (d, *J* = 8.4 Hz, 1H), 4.68 (t, *J* = 8.4 Hz, 2H), 4.39 (t, *J* = 8.4 Hz, 2H), 2.35 (s, 3H); <sup>13</sup>C NMR (150 MHz, CDCl<sub>3</sub>) δ 160.2, 153.2, 150.1, 149.7, 143.6, 138.4, 136.6, 127.6, 126.5, 126.0, 123.2, 122.0, 120.0, 94.6, 68.2, 43.7, 22.2; FT-IR (KBr) 2920, 2848, 1662, 1626, 1586, 1486, 1276, 1102, 750 cm<sup>-1</sup>; HRMS (ESI) *m/z* [M+H]<sup>+</sup> calcd for C<sub>17</sub>H<sub>15</sub>N<sub>2</sub>O<sub>2</sub>: 279.1128, found 279.1132.

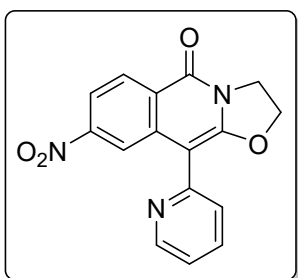

**8-Nitro-10-(pyridin-2-yl)-2,3-dihydro-5H-oxazolo[3,2-*b*]isoquinolin-5-one 3j.** Analytical TLC on silica gel, 1:5 acetone/CH<sub>2</sub>Cl<sub>2</sub> R<sub>f</sub> = 0.44; orange solid; mp 245-246 °C; yield 55% (34 mg); <sup>1</sup>H NMR (600 MHz, CDCl<sub>3</sub>) δ 8.79 (d, *J* = 4.2 Hz, 1H), 8.66 (s, 1H), 8.51 (d, *J* = 9.0 Hz, 1H), 8.06 (d, *J* = 9.0 Hz, 1H), 7.84 (t, *J* = 7.8 Hz, 1H), 7.55 (d, *J* = 7.8 Hz, 1H), 7.34-7.32 (m, 1H), 4.79 (t, *J* = 8.4 Hz, 2H), 4.46 (t, *J* = 7.8 Hz, 2H); <sup>13</sup>C NMR (150 MHz, CDCl<sub>3</sub>) δ 159.0, 151.9, 151.8, 150.9, 150.0, 139.2, 137.0, 129.5, 126.2, 125.8, 122.5, 119.8, 117.9, 95.0, 68.7, 44.0; FT-IR (KBr) 2922, 2854, 1665, 1619, 1585, 1523, 1483, 1346, 1083, 1021, 835, 786 cm<sup>-1</sup>; HRMS (ESI) *m/z* [M+H]<sup>+</sup> calcd for C<sub>16</sub>H<sub>12</sub>N<sub>3</sub>O<sub>4</sub>: 310.0822, found 310.0823.



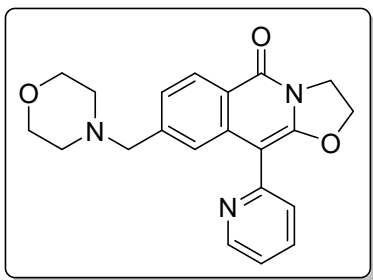

**8-(Morpholinomethyl)-10-(pyridin-2-yl)-2,3-dihydro-5H-oxazolo[3,2-*b*]isoquinolin-5-one 3k.** Analytical TLC on silica gel, 1:2 acetone/CH<sub>2</sub>Cl<sub>2</sub>  $R_f$  = 0.35; brown solid; mp 146-147 °C; yield 75% (54.4 mg); <sup>1</sup>H NMR (600 MHz, CDCl<sub>3</sub>) δ 8.76 (d,  $J$  = 4.8 Hz, 1H), 8.31 (d,  $J$  = 7.8 Hz, 1H), 7.79 (t,  $J$  = 7.8 Hz, 1H), 7.55 (s, 1H), 7.49 (d,  $J$  = 7.8 Hz, 1H), 7.35 (d,  $J$  = 8.4 Hz, 1H), 7.29-7.27 (m, 1H), 4.69 (t,  $J$  = 8.4 Hz, 2H), 4.40 (t,  $J$  = 7.8 Hz, 2H), 3.67-3.66 (m, 4H), 3.51 (s, 2H), 2.42-2.41 (m, 4H); <sup>13</sup>C NMR (150 MHz, CDCl<sub>3</sub>) δ 160.0, 153.1, 150.3, 149.7, 143.2, 138.3, 136.6, 127.7, 126.4, 125.2, 123.5, 122.0, 121.4, 94.7, 68.2, 67.0, 63.3, 53.7, 43.7; FT-IR (KBr) 2921, 2853, 1662, 1628, 1586, 1549, 1348, 1172, 1115, 914, 864, 782 cm<sup>-1</sup>; HRMS (ESI)  $m/z$  [M+H]<sup>+</sup> calcd for C<sub>21</sub>H<sub>22</sub>N<sub>3</sub>O<sub>3</sub>: 364.1656, found 364.1654.

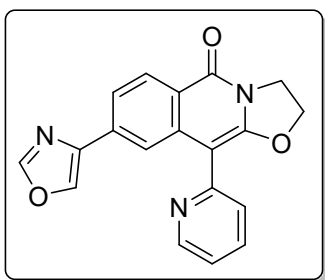

**8-(Oxazol-4-yl)-10-(pyridin-2-yl)-2,3-dihydro-5H-oxazolo[3,2-*b*]isoquinolin-5-one 3l.** Analytical TLC on silica gel, 1:4 acetone/CH<sub>2</sub>Cl<sub>2</sub>  $R_f$  = 0.38; brown solid; mp 178-179 °C; yield 73% (48.3 mg); <sup>1</sup>H NMR (600 MHz, CDCl<sub>3</sub>) δ 8.80 (d,  $J$  = 4.2 Hz, 1H), 8.41 (d,  $J$  = 8.4 Hz, 1H), 7.97 (s, 1H), 7.90 (s, 1H), 7.83 (t,  $J$  = 7.8 Hz, 1H), 7.58 (d,  $J$  = 8.4 Hz, 1H), 7.55 (d,  $J$  = 7.8 Hz, 1H), 7.40 (s, 1H), 7.33-7.31 (m, 1H), 4.73 (t,  $J$  = 7.8 Hz, 2H), 4.43 (t,  $J$  = 7.8 Hz, 2H); <sup>13</sup>C NMR (150 MHz, CDCl<sub>3</sub>) δ 159.7, 152.8, 151.2, 151.1, 150.8, 149.9, 138.9, 136.7, 131.6, 128.6, 126.4, 123.5, 122.2, 121.9, 120.2, 119.1, 94.7, 68.3, 43.8; FT-IR (KBr) 2920, 2852, 1661, 1626, 1585, 1549, 1489, 1341, 1199, 1104, 1020, 867 cm<sup>-1</sup>; HRMS (ESI)  $m/z$  [M+H]<sup>+</sup> calcd for C<sub>19</sub>H<sub>14</sub>N<sub>3</sub>O<sub>3</sub>: 332.1030, found 332.1022.

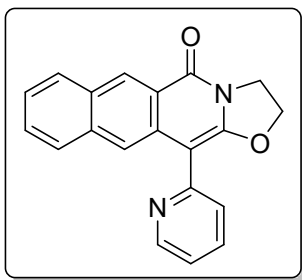

**12-(Pyridin-2-yl)-2,3-dihydro-5H-benzo[g]oxazolo[3,2-b]isoquinolin-5-one 3m.** Analytical TLC on silica gel, 1:5 acetone/CH<sub>2</sub>Cl<sub>2</sub>  $R_f$  = 0.51; yellow solid; mp 210-211 °C; yield 68% (42.7 mg); <sup>1</sup>H NMR (400 MHz, CDCl<sub>3</sub>) δ 8.98 (s, 1H), 8.82 (d,  $J$  = 4.8 Hz, 1H), 8.02 (s, 1H), 8.00 (d,  $J$  = 8.4 Hz, 1H), 7.85-7.81 (m, 1H), 7.75 (d,  $J$  = 8.0 Hz, 1H), 7.58 (d,  $J$  = 8.0 Hz, 1H), 7.50-7.46 (m, 1H), 7.43-7.39 (m, 1H), 7.33-7.30 (m, 1H), 4.69 (t,  $J$  = 8.0 Hz, 2H), 4.41 (t,  $J$  = 8.0 Hz, 2H); <sup>13</sup>C NMR (150 MHz, CDCl<sub>3</sub>) δ 160.9, 153.5, 149.8, 149.3, 136.7, 136.0, 133.8, 130.2, 129.4, 129.1, 128.2, 127.7, 126.6, 125.3, 122.1, 121.9, 121.4, 93.9, 68.2, 43.6; FT-IR (KBr) 2923, 1663, 1586, 1497, 1469, 1432, 1358, 1183, 1017, 896, 780 cm<sup>-1</sup>; HRMS (ESI)  $m/z$  [M+H]<sup>+</sup> calcd for C<sub>20</sub>H<sub>15</sub>N<sub>2</sub>O<sub>2</sub>: 315.1128, found 315.1127.

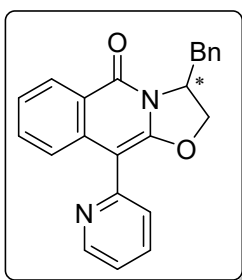

**3-Benzyl-10-(pyridin-2-yl)-2,3-dihydro-5H-oxazolo[3,2-b]isoquinolin-5-one (+)-3n.** Analytical TLC on silica gel, 1:6 acetone/CH<sub>2</sub>Cl<sub>2</sub>  $R_f$  = 0.52; brown solid; mp 140-141 °C; yield 77% (54 mg); <sup>1</sup>H NMR (600 MHz, CDCl<sub>3</sub>) δ 8.73 (d,  $J$  = 4.8 Hz, 1H), 8.41 (d,  $J$  = 7.8 Hz, 1H), 7.73 (t,  $J$  = 7.8 Hz, 1H), 7.65 (d,  $J$  = 7.8 Hz, 1H), 7.53 (t,  $J$  = 7.8 Hz, 1H), 7.35-7.28 (m, 4H), 7.24-7.22 (m, 4H), 5.12-5.09 (m, 1H), 4.48-4.46 (m, 1H), 4.41 (t,  $J$  = 8.4 Hz, 1H), 3.61-3.59 (m, 1H), 2.97-2.94 (m, 1H); <sup>13</sup>C NMR (150 MHz, CDCl<sub>3</sub>) δ 160.1, 153.2, 150.1, 149.7, 138.3, 136.5, 136.0, 132.9, 129.6, 129.0, 127.7, 127.3, 126.5, 124.3, 123.7, 122.6, 121.9, 94.7, 71.8, 57.3, 37.0; FT-IR (KBr) 2919, 2851, 1665, 1629, 1585, 1549, 1485, 1434, 1334, 1086, 994, 749 cm<sup>-1</sup>; HRMS (ESI)  $m/z$  [M+H]<sup>+</sup> calcd for C<sub>23</sub>H<sub>19</sub>N<sub>2</sub>O<sub>2</sub>: 355.1441, found 355.1443; [ $\alpha$ ]<sub>D</sub><sup>23.4</sup> = + 44.62 (c = 0.13, CHCl<sub>3</sub>); HPLC: >99% ee [CHIRALCEL AD-H, hexane/<sup>i</sup>PrOH = 70:30, flow rate: 1 mL/min,  $\lambda$  = 254 nm,  $t_R$  = 17.38 min (minor), 38.53 min (major)].

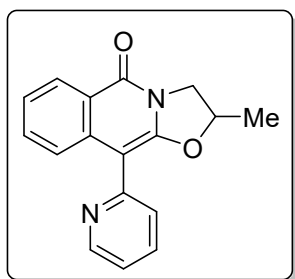

**2-Methyl-10-(pyridin-2-yl)-2,3-dihydro-5H-oxazolo[3,2-*b*]isoquinolin-5-one (±)-3o.** Analytical TLC on silica gel, 1:6 acetone/CH<sub>2</sub>Cl<sub>2</sub>  $R_f = 0.55$ ; colorless solid; mp 149-150 °C; yield 59% (32 mg); <sup>1</sup>H NMR (600 MHz, CDCl<sub>3</sub>) δ 8.79 (d,  $J = 4.2$  Hz, 1H), 8.40 (d,  $J = 8.4$  Hz, 1H), 7.81 (t,  $J = 7.8$  Hz, 1H), 7.70 (d,  $J = 8.4$  Hz, 1H), 7.57-7.52 (m, 2H), 7.34 (t,  $J = 7.8$  Hz, 1H), 7.30-7.29 (m, 1H), 5.11-5.05 (m, 1H), 4.57-4.54 (m, 1H), 3.98-3.95 (m, 1H), 1.60 (d,  $J = 6.0$  Hz, 3H); <sup>13</sup>C NMR (150 MHz, CDCl<sub>3</sub>) δ 160.3, 153.3, 150.0, 149.7, 138.4, 136.6, 132.9, 127.6, 126.5, 124.2, 123.6, 122.2, 121.9, 94.5, 77.4, 50.0, 20.1; FT-IR (KBr) 2921, 2853, 1666, 1630, 1586, 1486, 1377, 1049, 823, 787, 695 cm<sup>-1</sup>; HRMS (ESI)  $m/z$  [M+H]<sup>+</sup> calcd for C<sub>17</sub>H<sub>15</sub>N<sub>2</sub>O<sub>2</sub>: 279.1128, found 279.1135; HPLC: [CHIRALCEL AD-H, hexane/<sup>*i*</sup>PrOH = 70:30, flow rate: 1 mL/min, λ = 254 nm,  $t_R = 18.94$  min, 30.02 min].

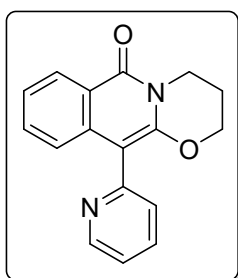

**11-(Pyridin-2-yl)-3,4-dihydro-2H,6H-[1,3]oxazino[3,2-*b*]isoquinolin-6-one 3p.** Analytical TLC on silica gel, 1:6 acetone/CH<sub>2</sub>Cl<sub>2</sub>  $R_f = 0.53$ ; light yellow solid; mp 190-191 °C; yield 54% (30 mg); <sup>1</sup>H NMR (600 MHz, CDCl<sub>3</sub>) δ 8.77 (d,  $J = 4.8$  Hz, 1H), 8.37 (d,  $J = 7.8$  Hz, 1H), 7.79 (t,  $J = 7.8$  Hz, 1H), 7.47 (t,  $J = 7.8$  Hz, 1H), 7.41 (d,  $J = 7.8$  Hz, 1H), 7.30-7.27 (m, 2H), 7.20 (d,  $J = 7.8$  Hz, 1H), 4.24-4.19 (m, 4H), 2.28-2.24 (m, 2H); <sup>13</sup>C NMR (150 MHz, CDCl<sub>3</sub>) δ 162.2, 154.3, 149.8, 147.4, 137.6, 136.5, 132.7, 127.9, 127.3, 124.2, 123.2, 122.0, 121.0, 97.3, 65.5, 39.8, 22.1; FT-IR (KBr) 2922, 1654, 1610, 1586, 1549, 1492, 1337, 1143, 700 cm<sup>-1</sup>; HRMS (ESI)  $m/z$  [M+H]<sup>+</sup> calcd for C<sub>17</sub>H<sub>15</sub>N<sub>2</sub>O<sub>2</sub>: 279.1128, found 279.1125.

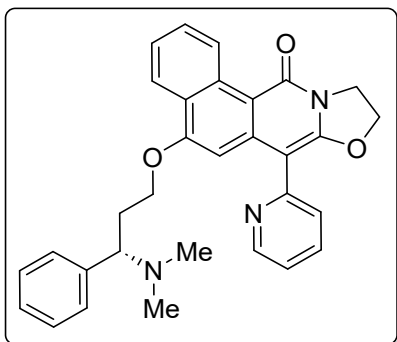

**5-(3-(Dimethylamino)-3-phenylpropoxy)-7-(pyridin-2-yl)-**

**9,10-dihydro-12H-benzo[*h*]oxazolo[3,2-*b*]isoquinolin-12-one 3q.** Analytical TLC on silica gel, 1:1 acetone/CH<sub>2</sub>Cl<sub>2</sub> R<sub>f</sub> = 0.35; brown solid; mp 126-127 °C; yield 73% (71.6 mg); <sup>1</sup>H NMR (600 MHz, CDCl<sub>3</sub>) δ 10.08 (d, *J* = 9.0 Hz, 1H), 8.72 (d, *J* = 4.8 Hz, 1H), 8.24 (d, *J* = 7.8 Hz, 1H), 7.77 (t, *J* = 7.8 Hz, 1H), 7.70 (t, *J* = 8.4 Hz, 1H), 7.52 (t, *J* = 7.8 Hz, 1H), 7.46 (d, *J* = 7.8 Hz, 1H), 7.30-7.25 (m, 4H), 7.21 (d, *J* = 7.2 Hz, 2H), 6.77 (s, 1H), 4.71 (t, *J* = 7.8 Hz, 2H), 4.49 (t, *J* = 8.4 Hz, 2H), 3.94-3.90 (m, 1H), 3.74-3.70 (m, 1H), 3.50-3.48 (m, 1H), 2.58-2.52 (m, 1H), 2.20 (s, 6H), 2.18-2.16 (m, 1H); <sup>13</sup>C NMR (150 MHz, CDCl<sub>3</sub>) δ 159.8, 157.9, 153.5, 151.2, 149.8, 142.4, 139.6, 136.6, 133.6, 128.8, 128.5, 128.3, 127.4, 126.7, 126.2, 125.0, 124.3, 122.0, 121.8, 109.0, 99.7, 95.7, 68.3, 67.8, 65.6, 44.4, 43.0, 32.8; FT-IR (KBr) 2923, 1756, 1661, 1589, 1544, 1468, 1439, 1241, 1154, 1089, 914, 772 cm<sup>-1</sup>; HRMS (ESI) *m/z* [M+H]<sup>+</sup> calcd for C<sub>31</sub>H<sub>30</sub>N<sub>3</sub>O<sub>3</sub>: 492.2282, found 492.2286.

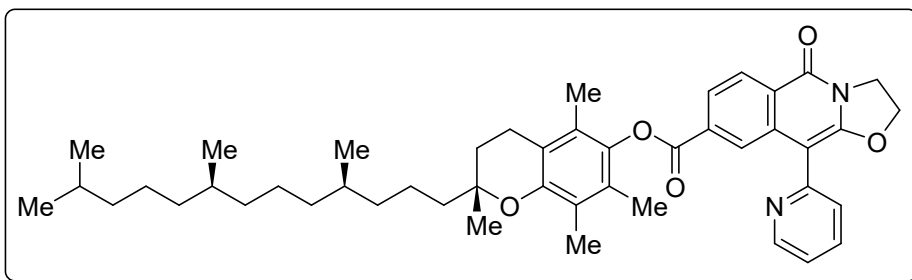

**(*R*)-2,5,7,8-**

**Tetramethyl-2-(((4*R*,8*R*)-4,8,12-trimethyltridecyl)chroman-6-yl) 5-oxo-10-(pyridin-2-yl)-2,3-dihydro-5*H*-oxazolo[3,2-*b*]isoquinoline-8-carboxylate 3r.** Analytical TLC on silica gel, 1:6 acetone/CH<sub>2</sub>Cl<sub>2</sub> R<sub>f</sub> = 0.54; yellow solid; mp 153-154 °C; yield 77% (111 mg); <sup>1</sup>H NMR (600 MHz, CDCl<sub>3</sub>) δ 8.75 (d, *J* = 4.2 Hz, 1H), 8.59 (s, 1H), 8.50 (d, *J* = 8.4 Hz, 1H), 8.12 (d, *J* = 8.4 Hz, 1H), 7.79 (t, *J* = 7.8 Hz, 1H), 7.54 (d, *J* = 7.8 Hz, 1H), 7.28-7.27 (m, 1H), 4.75 (t, *J* = 8.4 Hz, 2H), 4.46 (t, *J* = 8.4 Hz, 2H), 2.59 (t, *J* = 6.6 Hz, 2H), 2.10 (s, 3H), 2.02 (s, 3H), 1.98 (s, 3H), 1.84-1.73 (m, 2H), 1.55-1.49 (m, 2H), 1.46-1.36 (m, 3H), 1.31-1.21 (m, 12H), 1.15-1.03 (m, 7H), 0.86-0.83 (m, 12H); <sup>13</sup>C NMR (150 MHz, CDCl<sub>3</sub>) δ 164.9, 159.7, 152.5, 150.8, 149.9, 149.6, 140.7, 138.4, 136.7, 133.4, 128.2, 126.9, 126.5, 126.3, 125.3, 125.2, 124.7, 123.3,

122.3, 117.6, 95.1, 75.2, 68.4, 43.9, 39.5, 37.69, 37.67, 37.58, 37.52, 37.4, 32.9, 32.8, 28.1, 24.95, 24.93, 24.5, 22.8, 22.7, 21.1, 20.7, 19.89, 19.82, 19.7, 13.2, 12.3, 11.9; FT-IR (KBr) 2923, 1734, 1665, 1585, 1549, 1465, 1376, 1230, 1199, 1093, 958, 751  $\text{cm}^{-1}$ ; HRMS (ESI)  $m/z$   $[M+H]^+$  calcd for  $\text{C}_{46}\text{H}_{61}\text{N}_2\text{O}_5$ : 721.4575, found 721.4568.

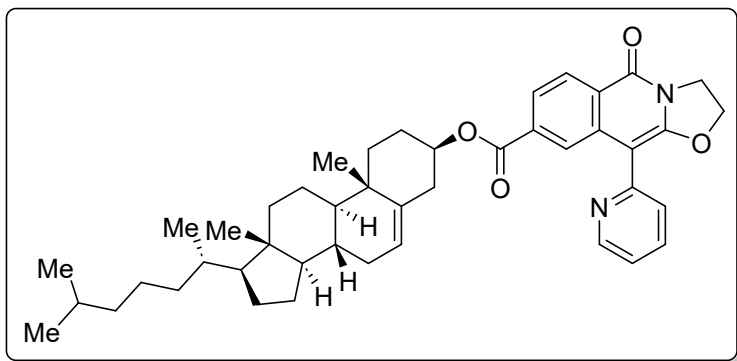

**(3*R*,8*R*,9*R*,10*S*,13*S*,14*R*,17*S*)-**

**10,13-Dimethyl-17-((*S*)-6-methylheptan-2-yl)-2,3,4,7,8,9,10,11,12,13,14,15,16,17-tetradecahydro-1*H*-cyclopenta[*a*]phenanthren-3-yl 5-oxo-10-(pyridin-2-yl)-2,3-dihydro-5*H*-oxazolo[3,2-*b*]isoquinoline-8-carboxylate **3s**.** Analytical TLC on silica gel, 1:6 acetone/ $\text{CH}_2\text{Cl}_2$   $R_f$  = 0.51; light yellow solid; mp 230-231  $^\circ\text{C}$ ; yield 75% (101 mg);  $^1\text{H}$  NMR (600 MHz,  $\text{CDCl}_3$ )  $\delta$  8.77 (d,  $J$  = 4.2 Hz, 1H), 8.41 (d,  $J$  = 8.4 Hz, 1H), 8.38 (s, 1H), 7.90-7.89 (m, 1H), 7.82-7.79 (m, 1H), 7.52 (d,  $J$  = 7.8 Hz, 1H), 7.30-7.28 (m, 1H), 5.40-5.39 (m, 1H), 4.83-4.77 (m, 1H), 4.73 (t,  $J$  = 8.4 Hz, 2H), 4.43 (t,  $J$  = 8.4 Hz, 2H), 2.43-2.41 (m, 2H), 2.02-1.95 (m, 3H), 1.91-1.87 (m, 1H), 1.85-1.79 (m, 1H), 1.72-1.66 (m, 2H), 1.60-1.54 (m, 2H), 1.53-1.48 (m, 2H), 1.47-1.42 (m, 2H), 1.37-1.30 (m, 2H), 1.28-1.24 (m, 2H), 1.20-1.07 (m, 6H), 1.04 (s, 3H), 1.02-0.95 (m, 3H), 0.91-0.90 (m, 3H), 0.86-0.85 (m, 6H), 0.67 (s, 3H);  $^{13}\text{C}$  NMR (150 MHz,  $\text{CDCl}_3$ )  $\delta$  165.7, 159.7, 152.6, 150.6, 149.9, 139.7, 138.2, 136.7, 134.6, 127.9, 126.3, 125.8, 124.8, 124.2, 122.9, 122.2, 95.1, 75.3, 68.3, 56.8, 56.2, 50.1, 43.9, 42.4, 39.8, 39.6, 38.2, 37.1, 36.7, 36.3, 35.9, 32.06, 32.00, 28.3, 28.1, 27.8, 24.4, 23.9, 22.9, 22.7, 21.1, 19.5, 18.8, 12.0; FT-IR (KBr) 2926, 1716, 1664, 1630, 1585, 1550, 1468, 1252, 1204, 1107, 962, 756  $\text{cm}^{-1}$ ; HRMS (ESI)  $m/z$   $[M+H]^+$  calcd for  $\text{C}_{44}\text{H}_{57}\text{N}_2\text{O}_4$ : 677.4313, found 677.4306.

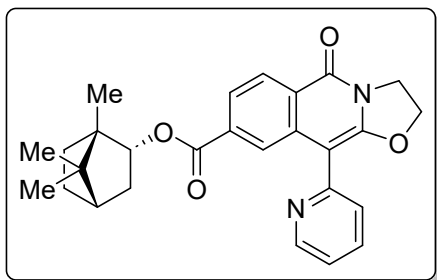

**1,7,7-Trimethylbicyclo[2.2.1]heptan-2-yl 5-oxo-10-**

**(pyridin-2-yl)-2,3-dihydro-5H-oxazolo[3,2-*b*]isoquinoline-8-carboxylate 3t.** Analytical TLC on silica gel, 1:6 acetone/CH<sub>2</sub>Cl<sub>2</sub> *R<sub>f</sub>* = 0.45; light yellow solid; mp 192-193 °C; yield 79% (70 mg); <sup>1</sup>H NMR (600 MHz, CDCl<sub>3</sub>) δ 8.76-8.75 (m, 1H), 8.464-8.462 (m, 1H), 8.42 (d, *J* = 7.8 Hz, 1H), 7.92-7.90 (m, 1H), 7.80-7.78 (m, 1H), 7.53 (d, *J* = 7.8 Hz, 1H), 7.28-7.26 (m, 1H), 5.07-5.04 (m, 1H), 4.74 (t, *J* = 8.4 Hz, 2H), 4.44 (t, *J* = 8.4 Hz, 2H), 2.45-2.40 (m, 1H), 2.03-1.98 (m, 1H), 1.80-1.74 (m, 1H), 1.72-1.70 (m, 1H), 1.37-1.32 (m, 1H), 1.26-1.22 (m, 1H), 1.09-1.06 (m, 1H), 0.93 (s, 3H), 0.89 (s, 3H), 0.86 (s, 3H); <sup>13</sup>C NMR (150 MHz, CDCl<sub>3</sub>) δ 166.5, 159.7, 152.6, 150.6, 149.8, 138.2, 136.6, 134.5, 127.9, 126.3, 125.9, 124.8, 124.1, 122.1, 95.0, 81.0, 68.4, 49.2, 47.9, 45.0, 43.8, 36.9, 28.1, 27.3, 19.8, 19.0, 13.6; FT-IR (KBr) 2923, 1715, 1664, 1630, 1585, 1551, 1485, 1255, 1203, 1108, 1016, 755 cm<sup>-1</sup>; HRMS (ESI) *m/z* [M+H]<sup>+</sup> calcd for C<sub>27</sub>H<sub>29</sub>N<sub>2</sub>O<sub>4</sub>: 445.2122, found 445.2126.

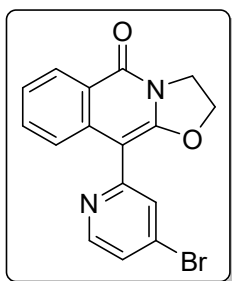

**10-(4-Bromopyridin-2-yl)-2,3-dihydro-5H-oxazolo[3,2-*b*]isoquinolin-**

**5-one 3u.** Analytical TLC on silica gel, 1:5 acetone/CH<sub>2</sub>Cl<sub>2</sub> *R<sub>f</sub>* = 0.48; colorless solid; mp 164-165 °C; yield 70% (47.8 mg); <sup>1</sup>H NMR (600 MHz, CDCl<sub>3</sub>) δ 8.56 (d, *J* = 4.8 Hz, 1H), 8.36 (d, *J* = 8.4 Hz, 1H), 7.70-7.67 (m, 2H), 7.56-7.54 (m, 1H), 7.44-7.43 (m, 1H), 7.34-7.32 (m, 1H), 4.72 (t, *J* = 7.8 Hz, 2H), 4.41 (t, *J* = 8.4 Hz, 2H); <sup>13</sup>C NMR (150 MHz, CDCl<sub>3</sub>) δ 160.2, 154.6, 150.5, 150.2, 137.8, 133.14, 133.12, 129.5, 127.7, 125.2, 124.5, 123.4, 122.2, 93.6, 68.4, 43.8; FT-IR (KBr) 2921, 1664, 1564, 1486, 1421, 1339, 1124, 1087, 1017, 984, 767 cm<sup>-1</sup>; HRMS (ESI) *m/z* [M+H]<sup>+</sup> calcd for C<sub>16</sub>H<sub>12</sub>BrN<sub>2</sub>O<sub>2</sub>: 343.0077, found 343.0074.

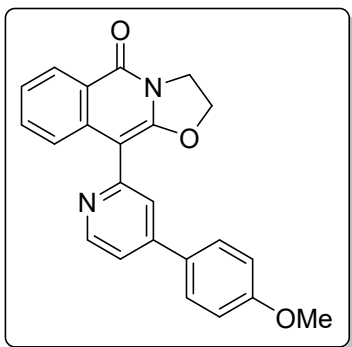

**10-(4-(4-Methoxyphenyl)pyridin-2-yl)-2,3-dihydro-5H-oxazolo[3,2-*b*]isoquinolin-5-one 3v.** Analytical TLC on silica gel, 1:5 acetone/CH<sub>2</sub>Cl<sub>2</sub> R<sub>f</sub> = 0.40; brown solid; mp 222-223 °C; yield 75% (55.5 mg); <sup>1</sup>H NMR (600 MHz, CDCl<sub>3</sub>) 8.75 (d, *J* = 4.8 Hz, 1H), 8.38 (d, *J* = 7.8 Hz, 1H), 7.68-7.67 (m, 2H), 7.64 (d, *J* = 8.4 Hz, 2H), 7.55-7.52 (m, 1H), 7.46-7.45 (m, 1H), 7.34-7.31 (m, 1H), 7.02 (d, *J* = 9.0 Hz, 2H), 4.70 (t, *J* = 8.4 Hz, 2H), 4.42 (t, *J* = 7.8 Hz, 2H), 3.86 (s, 3H); <sup>13</sup>C NMR (150 MHz, CDCl<sub>3</sub>) δ 160.7, 160.2, 153.5, 150.2, 150.1, 148.6, 138.4, 132.9, 130.4, 128.3, 127.7, 124.3, 123.8, 123.6, 122.3, 119.5, 114.6, 94.9, 68.2, 55.5, 43.8; FT-IR (KBr) 2922, 1666, 1596, 1546, 1515, 1487, 1250, 1182, 1022, 826 cm<sup>-1</sup>; HRMS (ESI) *m/z* [M+H]<sup>+</sup> calcd for C<sub>23</sub>H<sub>19</sub>N<sub>2</sub>O<sub>3</sub>: 371.1390, found 371.1395.

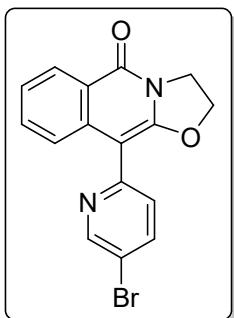

**10-(5-Bromopyridin-2-yl)-2,3-dihydro-5H-oxazolo[3,2-*b*]isoquinolin-5-one 3w.** Analytical TLC on silica gel, 1:5 acetone/CH<sub>2</sub>Cl<sub>2</sub> R<sub>f</sub> = 0.47; light brown solid; mp 154-155 °C; yield 73% (50 mg); <sup>1</sup>H NMR (600 MHz, CDCl<sub>3</sub>) δ 8.80-8.79 (m, 1H), 8.37-8.35 (m, 1H), 7.90 (dd, *J* = 8.4, 2.4 Hz, 1H), 7.67 (d, *J* = 7.8 Hz, 1H), 7.56-7.53 (m, 1H), 7.42 (d, *J* = 8.4 Hz, 1H), 7.34-7.32 (m, 1H), 4.71 (t, *J* = 8.4 Hz, 2H), 4.41 (t, *J* = 8.4 Hz, 2H); <sup>13</sup>C NMR (150 MHz, CDCl<sub>3</sub>) δ 160.1, 151.6, 150.7, 150.2, 139.2, 137.8, 133.0, 127.7, 127.6, 124.5, 123.4, 122.3, 118.9, 93.6, 68.3, 43.8; FT-IR (KBr) 2922, 1663, 1568, 1547, 1485, 1462, 1367, 1341, 1090, 1013, 864, 769 cm<sup>-1</sup>; HRMS (ESI) *m/z* [M+H]<sup>+</sup> calcd for C<sub>16</sub>H<sub>12</sub>BrN<sub>2</sub>O<sub>2</sub>: 343.0077, found 343.0083.

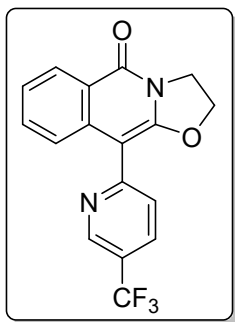

**10-(5-(Trifluoromethyl)pyridin-2-yl)-2,3-dihydro-5H-oxazolo[3,2-b]isoquinolin-5-one 3x.** Analytical TLC on silica gel, 1:6 acetone/CH<sub>2</sub>Cl<sub>2</sub> R<sub>f</sub> = 0.54; light yellow solid; mp 183-184 °C; yield 66% (43.8 mg); <sup>1</sup>H NMR (600 MHz, CDCl<sub>3</sub>) δ 8.99-8.98 (m, 1H), 8.37 (d, *J* = 7.2 Hz, 1H), 8.00-7.98 (m, 1H), 7.75 (d, *J* = 7.8 Hz, 1H), 7.66 (d, *J* = 7.8 Hz, 1H), 7.57-7.54 (m, 1H), 7.35-7.32 (m, 1H), 4.71 (t, *J* = 8.4 Hz, 2H), 4.41 (t, *J* = 8.4 Hz, 2H); <sup>13</sup>C NMR (150 MHz, CDCl<sub>3</sub>) δ 160.1, 157.0, 150.8, 146.4 (*J*<sub>C-F</sub> = 4.0 Hz), 137.5, 133.6 (*J*<sub>C-F</sub> = 3.3 Hz), 133.1, 127.7 (*J*<sub>C-F</sub> = 270.4 Hz), 124.6, 124.5 (*J*<sub>C-F</sub> = 33.0 Hz), 123.4, 122.8, 122.3, 93.7, 68.4, 43.7; <sup>19</sup>F NMR (565 MHz, CDCl<sub>3</sub>) δ -62.26; FT-IR (KBr) 2923, 1662, 1603, 1488, 1329, 1125, 1081, 1017, 866, 762 cm<sup>-1</sup>; HRMS (ESI) *m/z* [M+H]<sup>+</sup> calcd for C<sub>17</sub>H<sub>12</sub>F<sub>3</sub>N<sub>2</sub>O<sub>2</sub>: 333.0845, found 333.0847.

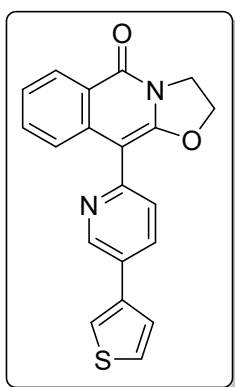

**10-(5-(Thiophen-3-yl)pyridin-2-yl)-2,3-dihydro-5H-oxazolo[3,2-b]isoquinolin-5-one 3y.** Analytical TLC on silica gel, 1:5 acetone/CH<sub>2</sub>Cl<sub>2</sub> R<sub>f</sub> = 0.41; yellow solid; mp 209-210 °C; yield 69% (47.7 mg); <sup>1</sup>H NMR (600 MHz, CDCl<sub>3</sub>) δ 9.01 (s, 1H), 8.39 (d, *J* = 8.4 Hz, 1H), 7.98 (d, *J* = 7.8 Hz, 1H), 7.72 (d, *J* = 7.8 Hz, 1H), 7.58 (s, 1H), 7.57-7.54 (m, 2H), 7.47-7.45 (m, 2H), 7.34 (t, *J* = 7.8 Hz, 1H), 4.73 (t, *J* = 7.8 Hz, 2H), 4.43 (t, *J* = 7.8 Hz, 2H); <sup>13</sup>C NMR (150 MHz, CDCl<sub>3</sub>) δ 160.2, 151.5, 150.2, 147.5, 138.7, 138.3, 134.1, 133.0, 129.8, 127.7, 127.2, 126.3, 126.0, 124.4, 123.6, 122.3, 121.6, 94.5, 68.3, 43.8; FT-IR (KBr) 2923, 2855, 1663, 1629, 1549, 1486, 1334, 1089, 1017, 864, 787, 760 cm<sup>-1</sup>; HRMS (ESI) *m/z* [M+H]<sup>+</sup> calcd for C<sub>20</sub>H<sub>15</sub>N<sub>2</sub>O<sub>2</sub>S: 347.0849, found 347.0850.



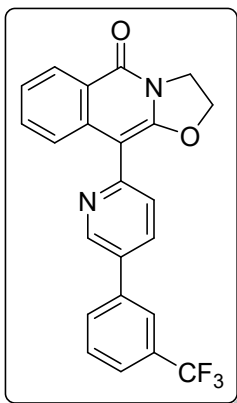

**10-(5-(3-(Trifluoromethyl)phenyl)pyridin-2-yl)-2,3-dihydro-5H-oxazolo[3,2-*b*]isoquinolin-5-one **3z**.** Analytical TLC on silica gel, 1:5 acetone/CH<sub>2</sub>Cl<sub>2</sub> *R<sub>f</sub>* = 0.48; light yellow solid; mp 217-218 °C; yield 68% (55.4 mg); <sup>1</sup>H NMR (600 MHz, CDCl<sub>3</sub>) δ 8.99 (s, 1H), 8.40 (d, *J* = 7.8 Hz, 1H), 8.01 (d, *J* = 8.4 Hz, 1H), 7.89 (s, 1H), 7.85 (d, *J* = 7.8 Hz, 1H), 7.76 (d, *J* = 8.4 Hz, 1H), 7.69-7.68 (m, 1H), 7.64 (t, *J* = 8.4 Hz, 2H), 7.57 (t, *J* = 7.8 Hz, 1H), 7.35 (t, *J* = 7.8 Hz, 1H), 4.74 (t, *J* = 8.4 Hz, 2H), 4.44 (t, *J* = 8.4 Hz, 2H); <sup>13</sup>C NMR (150 MHz, CDCl<sub>3</sub>) δ 160.2, 152.9, 150.4, 148.1, 138.6, 138.1, 135.0, 133.4, 133.0, 131.9 (*J*<sub>C-F</sub> = 32.1 Hz), 130.4, 129.8, 127.8 (*J*<sub>C-F</sub> = 210.4 Hz), 125.0, 124.9 (*J*<sub>C-F</sub> = 3.9 Hz), 124.5, 124.1 (*J*<sub>C-F</sub> = 3.7 Hz), 123.6, 123.2, 122.4, 94.3, 68.3, 43.8; <sup>19</sup>F NMR (565 MHz, CDCl<sub>3</sub>) δ -62.65; FT-IR (KBr) 2919, 2851, 1729, 1664, 1550, 1486, 1335, 1266, 1166, 1124, 1016, 763 cm<sup>-1</sup>; HRMS (ESI) *m/z* [M+H]<sup>+</sup> calcd for C<sub>23</sub>H<sub>16</sub>F<sub>3</sub>N<sub>2</sub>O<sub>2</sub>: 409.1158, found 409.1162.

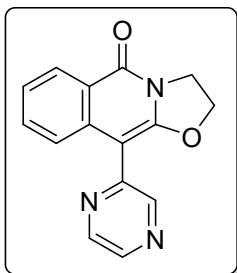

**10-(Pyrazin-2-yl)-2,3-dihydro-5H-oxazolo[3,2-*b*]isoquinolin-5-one **3aa**.** Analytical TLC on silica gel, 1:5 acetone/CH<sub>2</sub>Cl<sub>2</sub> *R<sub>f</sub>* = 0.42; light yellow solid; mp 247-248 °C; yield 77% (40.8 mg); <sup>1</sup>H NMR (600 MHz, CDCl<sub>3</sub>) δ 8.80 (s, 1H), 8.70 (s, 1H), 8.50 (s, 1H), 8.38 (d, *J* = 8.4 Hz, 1H), 7.75 (d, *J* = 8.4 Hz, 1H), 7.57 (t, *J* = 7.8 Hz, 1H), 7.35 (t, *J* = 7.8 Hz, 1H), 4.74 (t, *J* = 8.4 Hz, 2H), 4.43 (t, *J* = 7.8 Hz, 2H); <sup>13</sup>C NMR (150 MHz, CDCl<sub>3</sub>) δ 160.2, 151.0, 149.6, 147.4, 144.1, 142.2, 137.5, 133.2, 127.9, 124.7, 123.1, 122.4, 91.3, 68.4, 43.8; FT-IR (KBr) 2922, 1668, 1626, 1548, 1486, 1423, 1341, 1121, 1092, 1015, 866, 761 cm<sup>-1</sup>; HRMS (ESI) *m/z* [M+H]<sup>+</sup> calcd for C<sub>15</sub>H<sub>12</sub>N<sub>3</sub>O<sub>2</sub>: 266.0924, found 266.0928.

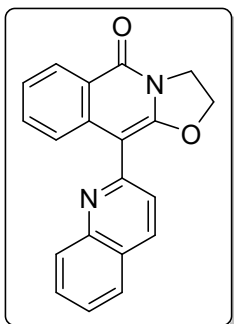

**10-(Quinolin-2-yl)-2,3-dihydro-5H-oxazolo[3,2-b]isoquinolin-5-one**

**3ab.** Analytical TLC on silica gel, 1:5 acetone/CH<sub>2</sub>Cl<sub>2</sub> R<sub>f</sub> = 0.43; light brown solid; mp 225-226 °C; yield 66% (41.4 mg); <sup>1</sup>H NMR (600 MHz, CDCl<sub>3</sub>) δ 8.40 (d, *J* = 7.8 Hz, 1H), 8.25 (d, *J* = 8.4 Hz, 1H), 8.16 (d, *J* = 8.4 Hz, 1H), 7.88 (d, *J* = 7.8 Hz, 1H), 7.76-7.73 (m, 2H), 7.62 (d, *J* = 8.4 Hz, 1H), 7.58 (t, *J* = 7.8 Hz, 1H), 7.54 (t, *J* = 7.8 Hz, 1H), 7.34 (t, *J* = 7.8 Hz, 1H), 4.72 (t, *J* = 8.4 Hz, 2H), 4.44 (t, *J* = 8.4 Hz, 2H). <sup>13</sup>C NMR (150 MHz, CDCl<sub>3</sub>) δ 160.3, 153.6, 150.6, 148.3, 138.3, 136.4, 133.0, 129.8, 129.5, 127.7, 127.6, 127.0, 126.7, 124.4, 124.3, 123.8, 122.4, 95.1, 68.3, 43.8; FT-IR (KBr) 2919, 2850, 1736, 1664, 1596, 1486, 1459, 1089, 1019 cm<sup>-1</sup>; HRMS (ESI) *m/z* [M+H]<sup>+</sup> calcd for C<sub>20</sub>H<sub>15</sub>N<sub>2</sub>O<sub>2</sub>: 315.1128, found 315.1133.

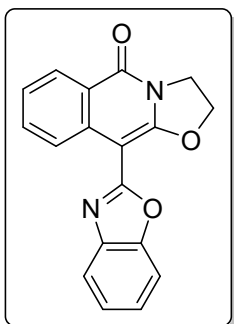

**10-(Benzo[d]oxazol-2-yl)-2,3-dihydro-5H-oxazolo[3,2-b]isoquinolin-5-one**

**3ac.** Analytical TLC on silica gel, 1:7 acetone/CH<sub>2</sub>Cl<sub>2</sub> R<sub>f</sub> = 0.49; brown solid; mp 230-231 °C; yield 70% (42.5 mg); <sup>1</sup>H NMR (400 MHz, CDCl<sub>3</sub>) δ 8.74 (d, *J* = 8.4 Hz, 1H), 8.40 (d, *J* = 8.0 Hz, 1H), 7.82-7.80 (m, 1H), 7.74-7.70 (m, 1H), 7.61-7.59 (m, 1H), 7.41 (t, *J* = 7.6 Hz, 1H), 7.37-7.33 (m, 2H), 4.91 (t, *J* = 8.4 Hz, 2H), 4.46 (t, *J* = 8.4 Hz, 2H); <sup>13</sup>C NMR (150 MHz, CDCl<sub>3</sub>) δ 160.0, 159.5, 154.3, 149.9, 141.7, 135.9, 133.7, 127.7, 125.1, 124.8, 124.7, 124.4, 121.9, 119.7, 110.4, 83.6, 69.1, 43.7; FT-IR (KBr) 2921, 1664, 1624, 1534, 1488, 1454, 1337, 1246, 1092, 957, 690 cm<sup>-1</sup>; HRMS (ESI) *m/z* [M+H]<sup>+</sup> calcd for C<sub>18</sub>H<sub>13</sub>N<sub>2</sub>O<sub>3</sub>: 305.0921, found 305.0925.

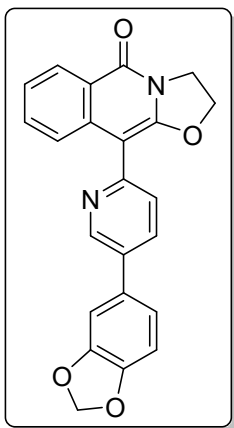

**10-(5-(Benzo[*d*][1,3]dioxol-5-yl)pyridin-2-yl)-2,3-dihydro-5*H*-oxazolo[3,2-*b*]isoquinolin-5-one 3ad.** Analytical TLC on silica gel, 1:5 acetone/CH<sub>2</sub>Cl<sub>2</sub> *R<sub>f</sub>* = 0.36; light brown solid; mp 235-236 °C; yield 68% (52.2 mg); <sup>1</sup>H NMR (600 MHz, CDCl<sub>3</sub>) δ 8.92 (d, *J* = 2.4 Hz, 1H), 8.39 (d, *J* = 7.8 Hz, 1H), 7.91 (dd, *J* = 7.8, 2.4 Hz, 1H), 7.72 (d, *J* = 8.4 Hz, 1H), 7.57-7.54 (m, 2H), 7.34 (t, *J* = 7.8 Hz, 1H), 7.13-7.12 (m, 2H), 6.95 (d, *J* = 8.4 Hz, 1H), 6.04 (s, 2H), 4.73 (t, *J* = 7.8 Hz, 2H), 4.44 (t, *J* = 8.4 Hz, 2H); <sup>13</sup>C NMR (150 MHz, CDCl<sub>3</sub>) δ 160.3, 151.5, 150.2, 148.6, 147.99, 147.91, 138.3, 134.67, 134.65, 133.0, 131.9, 127.7, 126.2, 124.4, 123.7, 122.3, 120.9, 109.1, 107.5, 101.5, 94.4, 68.3, 43.8; FT-IR (KBr) 2922, 1724, 1663, 1631, 1548, 1475, 1230, 1089, 1038, 862, 811 cm<sup>-1</sup>; HRMS (ESI) *m/z* [M+H]<sup>+</sup> calcd for C<sub>23</sub>H<sub>17</sub>N<sub>2</sub>O<sub>4</sub>: 385.1183, found 385.1177.

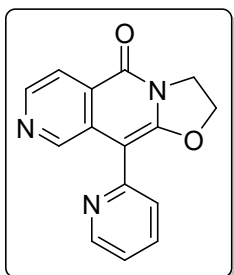

**10-(Pyridin-2-yl)-2,3-dihydro-5*H*-oxazolo[3,2-*b*][2,6]naphthyridin-5-one 3A.** Analytical TLC on silica gel, 1:1 acetone/CH<sub>2</sub>Cl<sub>2</sub> *R<sub>f</sub>* = 0.40; brown solid; mp 197-198 °C; yield 70% (37 mg); <sup>1</sup>H NMR (600 MHz, CDCl<sub>3</sub>) δ 9.17 (s, 1H), 8.77 (d, *J* = 4.2 Hz, 1H), 8.54 (d, *J* = 4.8 Hz, 1H), 8.10 (d, *J* = 5.4 Hz, 1H), 7.81 (t, *J* = 7.8 Hz, 1H), 7.55 (d, *J* = 7.8 Hz, 1H), 7.31-7.29 (m, 1H), 4.76 (t, *J* = 8.4 Hz, 2H), 4.44 (t, *J* = 8.4 Hz, 2H); <sup>13</sup>C NMR (150 MHz, CDCl<sub>3</sub>) δ 159.2, 151.7, 150.8, 149.9, 148.0, 144.0, 136.8, 132.5, 126.9, 126.1, 122.4, 119.4, 93.3, 68.4, 43.9; FT-IR (KBr) 2921, 1667, 1626, 1586, 1534, 1481, 1092, 1012, 984, 794 cm<sup>-1</sup>; HRMS (ESI) *m/z* [M+H]<sup>+</sup> calcd for C<sub>15</sub>H<sub>12</sub>N<sub>3</sub>O<sub>2</sub>: 266.0924, found 266.0925.

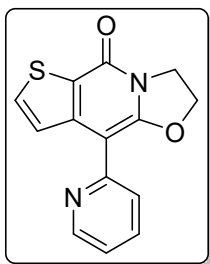

**9-(Pyridin-2-yl)-2,3-dihydro-5H-oxazolo[3,2-a]thieno[3,2-d]pyridin-5-one 3B.** Analytical TLC on silica gel, 1:5 acetone/CH<sub>2</sub>Cl<sub>2</sub> R<sub>f</sub> = 0.42; colorless solid; mp 186-187 °C; yield 68% (36.7 mg); <sup>1</sup>H NMR (600 MHz, CDCl<sub>3</sub>) δ 8.70 (d, *J* = 4.8 Hz, 1H), 7.76-7.72 (m, 2H), 7.68 (d, *J* = 5.4 Hz, 1H), 7.64 (d, *J* = 7.8 Hz, 1H), 7.21-7.19 (m, 1H), 4.81 (t, *J* = 8.4 Hz, 2H), 4.45 (t, *J* = 8.4 Hz, 2H); <sup>13</sup>C NMR (150 MHz, CDCl<sub>3</sub>) δ 155.5, 153.3, 152.5, 149.4, 146.8, 136.4, 133.8, 124.9, 124.5, 123.6, 121.5, 95.6, 69.1, 43.8; FT-IR (KBr) 2921, 2850, 1659, 1586, 1514, 1467, 1059, 967, 852, 797 cm<sup>-1</sup>; HRMS (ESI) *m/z* [M+H]<sup>+</sup> calcd for C<sub>14</sub>H<sub>11</sub>N<sub>2</sub>O<sub>2</sub>S: 271.0536, found 271.0544.

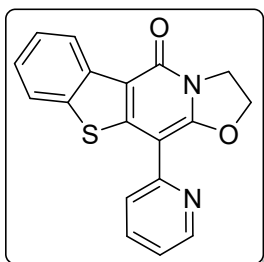

**11-(Pyridin-2-yl)-2,3-dihydro-5H-benzo[4,5]thieno[2,3-d]oxazolo[3,2-a]pyridin-5-one 3C.** Analytical TLC on silica gel, 1:5 acetone/CH<sub>2</sub>Cl<sub>2</sub> R<sub>f</sub> = 0.60; yellow solid; mp 225-226 °C; yield 79% (50.5 mg); <sup>1</sup>H NMR (600 MHz, CDCl<sub>3</sub>) δ 8.93 (d, *J* = 8.4 Hz, 1H), 8.72-8.71 (m, 1H), 7.86 (d, *J* = 7.2 Hz, 1H), 7.75-7.72 (m, 1H), 7.67 (d, *J* = 7.8 Hz, 1H), 7.32-7.27 (m, 2H), 7.14-7.12 (m, 1H), 4.94 (t, *J* = 9.0 Hz, 2H), 4.45 (t, *J* = 9.0 Hz, 2H); <sup>13</sup>C NMR (150 MHz, CDCl<sub>3</sub>) δ 156.9, 153.7, 151.7, 146.4, 140.5, 136.2, 131.8, 129.8, 125.4, 125.1, 122.8, 121.7, 121.6, 120.3, 109.6, 101.2, 70.1, 44.3; FT-IR (KBr) 2923, 1722, 1651, 1584, 1516, 1465, 1257, 1097, 1002, 943, 793, 733 cm<sup>-1</sup>; HRMS (ESI) *m/z* [M+H]<sup>+</sup> calcd for C<sub>18</sub>H<sub>13</sub>N<sub>2</sub>O<sub>2</sub>S: 321.0692, found 321.0690.

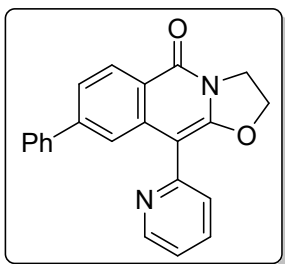

**8-Phenyl-10-(pyridin-2-yl)-2,3-dihydro-5H-oxazolo[3,2-b]isoquinolin-5-one 4.** Analytical TLC on silica gel, 1:5 acetone/CH<sub>2</sub>Cl<sub>2</sub> R<sub>f</sub> = 0.48; colorless solid; mp 238-239 °C; yield 86% (29 mg); <sup>1</sup>H NMR (600 MHz, CDCl<sub>3</sub>) δ 8.78 (d, *J* = 4.8 Hz, 1H), 8.43 (d, *J* = 8.4 Hz, 1H), 7.82-7.78 (m, 2H), 7.57-7.52 (m, 4H), 7.40 (t, *J* = 7.8 Hz, 2H), 7.36-7.33 (m, 1H), 7.29-7.27 (m, 1H), 4.71 (t, *J* = 8.4 Hz, 2H), 4.43 (t, *J* = 8.4 Hz, 2H); <sup>13</sup>C NMR (150 MHz, CDCl<sub>3</sub>) δ 160.1, 153.1, 150.5, 149.9, 145.6, 140.7, 138.7, 136.6, 128.8, 128.2, 128.0, 127.6, 126.4, 123.7, 122.1, 122.0, 121.2, 94.9, 68.3, 43.8; FT-IR (KBr) 2922, 2855, 1663, 1626, 1546, 1481, 1436, 1339, 1199, 1104, 760, 699 cm<sup>-1</sup>; HRMS (ESI) *m/z* [M+H]<sup>+</sup> calcd for C<sub>22</sub>H<sub>17</sub>N<sub>2</sub>O<sub>2</sub>: 341.1285, found 341.1290.

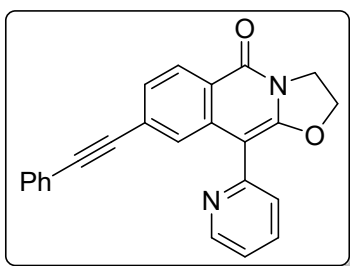

**8-(Phenylethynyl)-10-(pyridin-2-yl)-2,3-dihydro-5H-oxazolo[3,2-b]isoquinolin-5-one 5.** Analytical TLC on silica gel, 1:5 acetone/CH<sub>2</sub>Cl<sub>2</sub> R<sub>f</sub> = 0.50; light brown solid; mp 260-261 °C; yield 88% (32 mg); <sup>1</sup>H NMR (600 MHz, CDCl<sub>3</sub>) δ 8.79 (d, *J* = 4.8 Hz, 1H), 8.34 (d, *J* = 8.4 Hz, 1H), 7.83-7.80 (m, 1H), 7.77 (s, 1H), 7.52-7.49 (m, 3H), 7.45-7.43 (m, 1H), 7.33-7.32 (m, 3H), 7.31-7.29 (m, 1H), 4.71 (t, *J* = 8.4 Hz, 2H), 4.42 (t, *J* = 8.4 Hz, 2H); <sup>13</sup>C NMR (150 MHz, CDCl<sub>3</sub>) δ 159.8, 152.8, 150.6, 150.0, 138.3, 136.7, 131.8, 128.7, 128.5, 127.9, 127.7, 127.2, 126.7, 126.5, 122.9, 122.2, 121.5, 94.5, 91.9, 89.4, 68.3, 43.8; FT-IR (KBr) 2920, 1661, 1539, 1478, 1336, 1206, 1100, 1024, 963, 884, 755 cm<sup>-1</sup>; HRMS (ESI) *m/z* [M+H]<sup>+</sup> calcd for C<sub>24</sub>H<sub>17</sub>N<sub>2</sub>O<sub>2</sub>: 365.1285, found 365.1281.

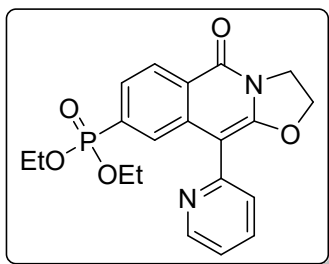

**Diethyl (5-oxo-10-(pyridin-2-yl)-2,3-dihydro-5H-oxazolo[3,2-b]isoquinolin-8-yl)phosphonate 6.** Analytical TLC on silica gel, 1:4 acetone/CH<sub>2</sub>Cl<sub>2</sub> R<sub>f</sub> = 0.34; brown solid; mp 140-141 °C; yield 73% (29 mg); <sup>1</sup>H NMR (600 MHz, CDCl<sub>3</sub>) δ 8.73 (d, *J* = 4.2 Hz, 1H), 8.43-8.41 (m, 1H), 8.16 (d, *J* = 15.6 Hz, 1H), 7.78 (t, *J* = 7.2 Hz, 1H), 7.65-6.62 (m, 1H), 7.49 (d, *J* = 7.8 Hz, 1H), 7.28-7.26 (m, 1H), 4.71 (t, *J* = 8.4 Hz, 2H), 4.41 (t, *J* = 8.4 Hz, 2H), 4.14-4.01 (m, 4H), 1.27 (t, *J* = 7.2 Hz, 6H); <sup>13</sup>C NMR (150 MHz, CDCl<sub>3</sub>) δ 159.6, 152.4, 150.8, 149.9, 138.1 (*J*<sub>C-P</sub> = 6.6 Hz), 136.7, 133.5 (*J*<sub>C-P</sub> = 183.6 Hz), 128.3 (*J*<sub>C-P</sub> = 12.1 Hz), 127.9 (*J*<sub>C-P</sub> = 14.8 Hz), 126.3, 126.0 (*J*<sub>C-P</sub> = 9.4 Hz), 124.5 (*J*<sub>C-P</sub> = 2.7 Hz), 122.3, 94.9, 68.3, 62.5 (*J*<sub>C-P</sub> = 5.4 Hz), 43.8, 16.3 (*J*<sub>C-P</sub> = 6.4 Hz); <sup>31</sup>P NMR (243 MHz, CDCl<sub>3</sub>) δ 17.67; FT-IR (KBr) 2920, 1662, 1541, 1477, 1339, 1242, 1022, 966, 795, 686 cm<sup>-1</sup>; HRMS (ESI) *m/z* [M+H]<sup>+</sup> calcd for C<sub>20</sub>H<sub>22</sub>N<sub>2</sub>O<sub>5</sub>P: 401.1261, found 401.1268.

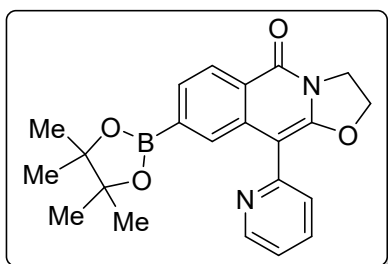

**10-(Pyridin-2-yl)-8-(4,4,5,5-tetramethyl-1,3,2-dioxaborolan-2-yl)-2,3-dihydro-5H-oxazolo[3,2-b]isoquinolin-5-one 7.** Analytical TLC on silica gel, 1:5 acetone/CH<sub>2</sub>Cl<sub>2</sub> R<sub>f</sub> = 0.42; colorless solid; mp 165-166 °C; yield 75% (29 mg); <sup>1</sup>H NMR (600 MHz, CDCl<sub>3</sub>) δ 8.77 (d, *J* = 4.8 Hz, 1H), 8.35 (d, *J* = 7.8 Hz, 1H), 8.04 (s, 1H), 7.81-7.78 (m, 1H), 7.73 (d, *J* = 8.4 Hz, 1H), 7.51 (d, *J* = 7.8 Hz, 1H), 7.29-7.27 (m, 1H), 4.68 (t, *J* = 8.4 Hz, 2H), 4.41 (t, *J* = 8.4 Hz, 2H), 1.30 (s, 12H); <sup>13</sup>C NMR (150 MHz, CDCl<sub>3</sub>) δ 160.3, 153.1, 150.0, 149.8, 137.3, 136.5, 130.3, 129.9, 126.6, 126.5, 124.0, 122.0, 95.1, 84.2, 68.1, 43.8, 24.9; FT-IR (KBr) 2923, 1664, 1586, 1541, 1476, 1364, 1147, 1094, 967, 754 cm<sup>-1</sup>; HRMS (ESI) *m/z* [M+H]<sup>+</sup> calcd for C<sub>22</sub>H<sub>24</sub>BN<sub>2</sub>O<sub>4</sub>: 391.1824, found 391.1816.

## Mechanistic Investigations

**Radical Trapping Experiments.** In an oven-dried pressure tube, a mixture of 2-phenyl-4,5-dihydrooxazole **1a** (0.2 mmol, 29 mg), methyl [1,2,3]triazolo[1,5-*a*]pyridine-3-carboxylate **2a** (0.3 mmol, 1.5 equiv, 53 mg), [Cp\*RhCl<sub>2</sub>]<sub>2</sub> (3 mol %, 0.006 mmol, 3.70 mg), NaOAc (0.1 mmol, 0.5 equiv, 8.2 mg) and ) and TEMPO (0.2 mmol, 31.2 mg ) or BHT (0.2 mmol, 44 mg) in TFE (1 mL) was stirred at 140 °C for 18 h under argon atmosphere. Upon completion, the resulting solution was cooled to room temperature, diluted with ethyl acetate (10 mL) and passed through a short celite pad. The purification was performed as described in the general procedure to afford **3a**.

**H/D Exchange Experiment of 1a with CD<sub>3</sub>OD in Absence of 2a.** In an oven-dried pressure tube, a mixture of 2-phenyl-4,5-dihydrooxazole **1a** (0.2 mmol, 29 mg), [Cp\*RhCl<sub>2</sub>]<sub>2</sub> (3 mol %, 0.006 mmol, 3.70 mg), NaOAc (0.1 mmol, 0.5 equiv, 8.2 mg) and CD<sub>3</sub>OD (2 mmol, 10 equiv, 82 μL) in TFE (1 mL) was stirred at 140 °C for 18 h under argon atmosphere. The resulting solution was cooled to room temperature, diluted with ethyl acetate (10 mL) and passed through a short celite pad. The purification was performed as described in the general procedure to afford [D<sub>n</sub>]-**1a**. The deuterium incorporation was observed as 25% at the *ortho*-position of aryl ring based on 600 MHz <sup>1</sup>H NMR spectrum.

**H/D Exchange Experiment of 1a with CD<sub>3</sub>OD in Presence of 2a.** In an oven-dried pressure tube, a mixture of 2-phenyl-4,5-dihydrooxazole **1a** (0.2 mmol, 29 mg), methyl [1,2,3]triazolo[1,5-*a*]pyridine-3-carboxylate **2a** (0.3 mmol, 1.5 equiv, 53 mg), [Cp\*RhCl<sub>2</sub>]<sub>2</sub> (3 mol %, 0.006 mmol, 3.70 mg), NaOAc (0.1 mmol, 0.5 equiv, 8.2 mg) and CD<sub>3</sub>OD (2 mmol, 10 equiv, 82 μL) in TFE (1 mL) was stirred at 140 °C for 18 h under argon atmosphere. The resulting solution was cooled to room temperature, diluted with ethyl acetate (10 mL) and passed through a short celite pad. The purification was performed as described in the general procedure to afford [D<sub>n</sub>]-**1a** and [D<sub>n</sub>]-**3a**. The deuterium incorporation in [D<sub>n</sub>]-**1a** was observed as 20% at the *ortho*-position of aryl ring based on 600 MHz <sup>1</sup>H NMR spectrum.

### Preparation of 2-(Phenyl-d<sub>5</sub>)-4,5-dihydrooxazole [D<sub>5</sub>]-1a.

**Step-I:**<sup>5a</sup> To a stirred solution of sulfuric acid (0.6 mL) in water (2 mL), benzene-d<sub>6</sub> (3 mmol, 265  $\mu$ L) was added dropwise at 0 °C, which was treated with NaBrO<sub>3</sub> (3.3 mmol, 1.1 equiv, 498 mg) at the same temperature in two portions with an interval of 1 h and allowed to stir for another 10 h at room temperature. Upon completion, the mixture was quenched with ice water and extracted with diethyl ether (3 x 20 mL). The combined organic layer was washed with brine (15 mL) and water (15 mL). Drying (Na<sub>2</sub>SO<sub>4</sub>) and evaporation of the solvent gave crude 1-bromobenzene-d<sub>5</sub> that was used for the next step without further purification (73% yield, 353 mg).

**Step-II:**<sup>5b</sup> To a stirred solution of 1-bromobenzene-d<sub>5</sub> (2.0 mmol, 320 mg) in THF (10 mL), *n*-BuLi (2.4 mmol, 1.2 mL, 2M in hexane) was added dropwise at -78 °C for a period of 10 min under argon atmosphere. The solution was allowed to stir for 30 min and then *N,N*-dimethylformamide (20 mmol, 1.5 mL) was added and continued the stirring at the same temperature for 10 min. Upon completion, monitored by TLC, the resulting mixture was quenched with H<sub>2</sub>O and extracted with EtOAc (3 x 20 mL). The combined organic layer was washed with brine (2 x 10 mL) and water (10 mL). Drying (Na<sub>2</sub>SO<sub>4</sub>) and evaporation of the solvent gave crude bezaldehyde-d<sub>5</sub> that was used for the next step without further purification (55% yield, 122 mg).

**Step-III:**<sup>1a</sup> To a stirred solution of bezaldehyde-d<sub>5</sub> (1 mmol, 111 mg) in *tert*-butyl alcohol (10 mL), 2-aminoethan-1-ol (1.1 mmol, 1.1 equiv, 67 mg) was added. The resultant mixture was allowed to stir at room temperature for 30 min under argon atmosphere. K<sub>2</sub>CO<sub>3</sub> (3 mmol, 3 equiv, 414 mg) and I<sub>2</sub> (2 mmol, 2 equiv, 506 mg) were then added and was further stirred at the same temperature for 18 h. The progress of the reaction was monitored by TLC. Upon completion, the reaction mixture was allowed to cool and was quenched with saturated aqueous Na<sub>2</sub>S<sub>2</sub>O<sub>3</sub> solution until the color of iodine was disappeared. The mixture was extracted with ethyl acetate (3 x 10 mL). The combined organic layer was washed with brine (2 x 5 mL) and water (5 mL). Drying (Na<sub>2</sub>SO<sub>4</sub>) and evaporation of the solvent gave a residue that was purified on silica gel column chromatography using *n*-hexane and ethyl acetate (80/20, v/v) as an eluent to afford 2-(phenyl-d<sub>5</sub>)-4,5-dihydrooxazole [D<sub>5</sub>]-1a in 75% (114 mg) yield.

### Kinetic Isotope Effect Experiments.<sup>5c</sup>

**Competitive Experiment.** In an oven-dried pressure tube, a mixture of 2-phenyl-4,5-dihydrooxazole **1a** (0.1 mmol, 14.7 mg) and 2-(phenyl-d<sub>5</sub>)-4,5-dihydrooxazole [D<sub>5</sub>]-**1a** (0.1



mmol, 17.6 mg) was reacted with methyl [1,2,3]triazolo[1,5-*a*]pyridine-3-carboxylate **2a** (0.15 mmol, 0.75 equiv, 26.5 mg) for 2 h under standard reaction conditions. The resulting mixture was cooled to room temperature, diluted with ethyl acetate (10 mL) and passed through a short pad of celite. The purification was performed as described in the general procedure to afford a mixture of **3a** and [D<sub>4</sub>]-**3a** in 12% yield. The intermolecular  $k_{\text{H}}/k_{\text{D}}$  was found to be 2.2, based on 400 MHz <sup>1</sup>H NMR of the product **3a** and [D<sub>4</sub>]-**3a**.

**Parallel Experiments.** Three sets of experiments were carried out, each having a mixture of 2-phenyl-4,5-dihydrooxazole **1a** (0.1 mmol, 14.7 mg) or 2-(phenyl-d<sub>5</sub>)-4,5-dihydrooxazole [D<sub>5</sub>]-**1a** (0.1 mmol, 17.6 mg) was reacted with methyl [1,2,3]triazolo[1,5-*a*]pyridine-3-carboxylate **2a** (0.075 mmol, 0.75 equiv, 13.3 mg) for 1 h (Set 1), 2h (Set 2) and 3h (Set 3), respectively, under standard reaction conditions. The resulting mixture was cooled to room temperature, diluted with ethyl acetate (10 mL) and passed through a short pad of celite. The purification was performed as described in the general procedure to afford a mixture of **3a** and [D<sub>4</sub>]-**3a**. The KIE value was calculated using 600 MHz <sup>1</sup>H NMR spectroscopy.

| Reaction Set | Time | $k_{\text{H}}/k_{\text{D}}$ | Yield of <b>3a</b> /[D <sub>4</sub> ]- <b>3a</b> |
|--------------|------|-----------------------------|--------------------------------------------------|
| Set 1        | 1h   | 2.3                         | 10 %                                             |
| Set 2        | 2h   | 2.3                         | 14 %                                             |
| Set 3        | 3h   | 2.4                         | 19 %                                             |

**Isotope Labelling Experiment.** In an oven-dried pressure tube, a mixture of 2-phenyl-4,5-dihydrooxazole **1a** (0.2 mmol, 29 mg), methyl [1,2,3]triazolo[1,5-*a*]pyridine-3-carboxylate **2a** (0.3 mmol, 1.5 equiv, 53 mg), [Cp\**Rh*Cl<sub>2</sub>]<sub>2</sub> (3 mol %, 0.006 mmol, 3.70 mg) and NaOAc (0.1 mmol, 0.5 equiv, 8.2 mg) was stirred in TFE/ H<sub>2</sub><sup>18</sup>O (9:1, v/v) at 140 °C for 18 h under argon atmosphere. The resultant solution was cooled to room temperature, diluted with ethyl acetate (10 mL) and passed through a short celite pad. The formation of <sup>18</sup>O-**3a** was confirmed by HRMS. HRMS (ESI)  $m/z$  [M+H]<sup>+</sup> calcd for C<sub>16</sub>H<sub>13</sub>N<sub>2</sub>O<sup>18</sup>O: 267.1015, found 267.1016.

Sample Name  
User Name  
Sample Type  
ACQ Method

SBT-431-RE  
SYSTEM (SYSTEM)  
Sample  
DIRECT MASS\_POSITIVE\_01\_1.m

Position  
Inj Vol  
IRM Calibration Status  
Comment

P1-A1  
5  
Success

Instrument Name  
InjPosition  
Data Filename  
Acquired Time

QTOF  
SBT-431-RE.d  
11-07-2024 10:03:36 (UTC+05:30)

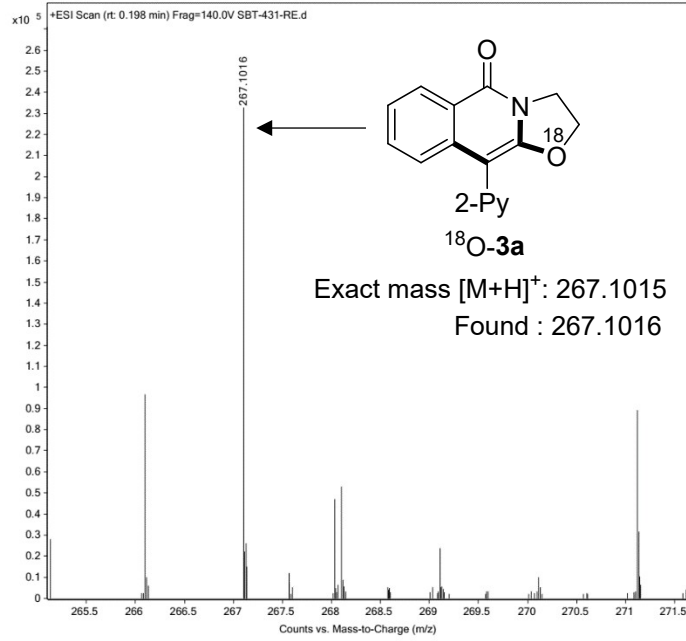

## References

1. (a) K. Schwekendiek and F. Glorius, *Synthesis*, 2006, **2006**, 2996; (b) M. Ishihara and H. Togo, *Tetrahedron*, 2007, **63**, 1474; (c) X.-F. Wu, H. Neumann, S. Neumann and M. Beller, *Chem. - Eur. J.*, 2012, **18**, 13619; (d) P. Garg, S. Chaudhary and M. D. Milton, *J. Org. Chem.*, 2014, **79**, 8668; (e) R. Mei, J. Loup and L. Ackermann, *ACS Catal.*, 2016, **6**, 793; (f) D. Zell, S. Warratz, D. Gelman, S. J. Garden, and L. Ackermann, *Chem. -Eur. J.*, 2016, **22**, 1248; (g) M. C. Mollo and L. R. Orelli, *Org. Lett.*, 2016, **18**, 6116; (h) K. Korvorapun, N. Kaplaneris, T. Rogge, S. Warratz, A. C. Stückl and L. Ackermann, *ACS Catal.*, 2018, **8**, 886; (i) K. M. Nakafuku, S. C. Fosu and D. A. Nagib, *J. Am. Chem. Soc.*, 2018, **140**, 11202; (j) Q. Shi, Y. Huang and W. H. Liu, *Precis. Chem.*, 2023, **1**, 316.
2. (a) Y. Shi, A. V. Gulevich and V. Gevorgyan, *Angew. Chem., Int. Ed.*, 2014, **53**, 14191; (b) J. H. Kim, T. Gensch, D. Zhao, L. Stegemann, C. A. Strassert and F. Glorius, *Angew. Chem., Int. Ed.*, 2015, **54**, 10975; (c) X. Hou, R. Wang, F. Fang, Z. Qu, J. Zhou, T. Yu, D. Wang, H. Liu and Y. Zhou, *Org. Lett.*, 2024, **26**, 4451.
3. C. Chen, C. Ni, J.-H. Song, L.-Y. Ding, X.-X. Zhang, H. Guo, K. Wang, Z. Chen and B. Zhu, *ACS Catal.*, 2024, **14**, 12181.
4. M. Lilley, B. Mambwe, R. F. W. Jackson and R. Muimo, *Chem. Commun.*, 2014, **50**, 9343.
5. (a) L. Ackermann, S. I. Kozhushkov and D. S. Yufit, *Chem. - Eur. J.*, 2012, **18**, 12068; (b) C.-H. Hung, P. Gandeepan, C.-H. Cheng, *ChemCatChem*, 2014, **6**, 2692; (c) X. Wang, A. Lerchen, C. G. Daniliuc and F. Glorius, *Angew. Chem., Int. Ed.*, 2018, **57**, 1712.

SBT-4OXAZOLE-OX-DG-1H

8.009  
7.980  
7.956  
7.711  
7.697  
7.441  
7.260

4.475  
4.459  
4.103  
4.077

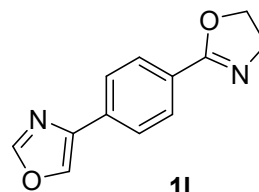

<sup>1</sup>H NMR (600 MHz, CDCl<sub>3</sub>)

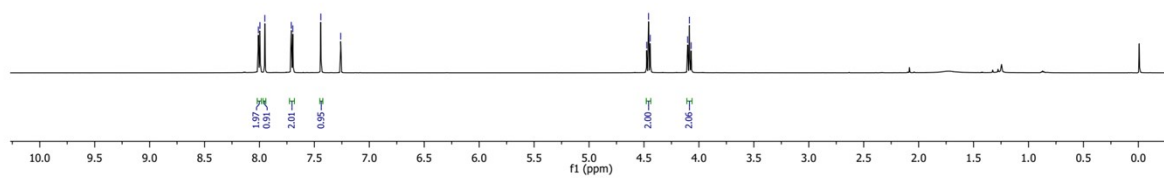

SBT-4OXAZOLE-OX-DG-13C

164.238

151.064  
150.985

130.137  
128.849  
127.821  
127.521  
122.506

77.371  
77.160  
76.948

63.877

55.076

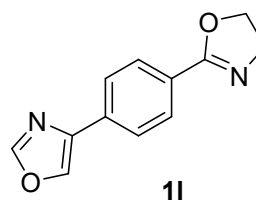

<sup>13</sup>C NMR (150 MHz, CDCl<sub>3</sub>)

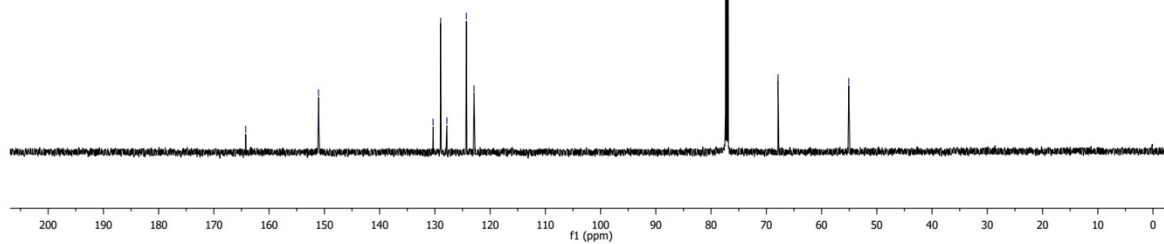

SBT-O-4Bn-OX-DG-CHI-1H

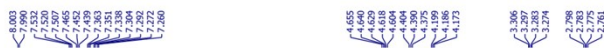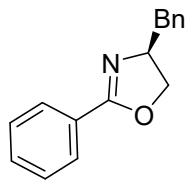

(S)-1n'

<sup>1</sup>H NMR (600 MHz, CDCl<sub>3</sub>)

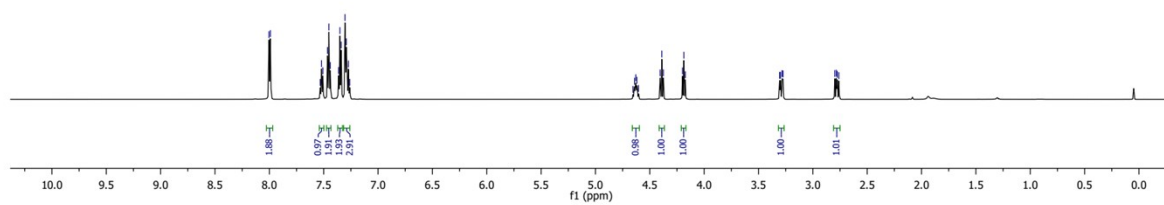

SBT-O-4Bn-OX-DG-CHI-13C

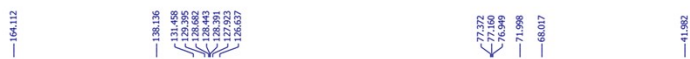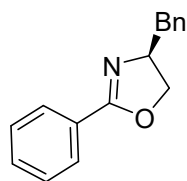

(S)-1n'

<sup>13</sup>C NMR (150 MHz, CDCl<sub>3</sub>)

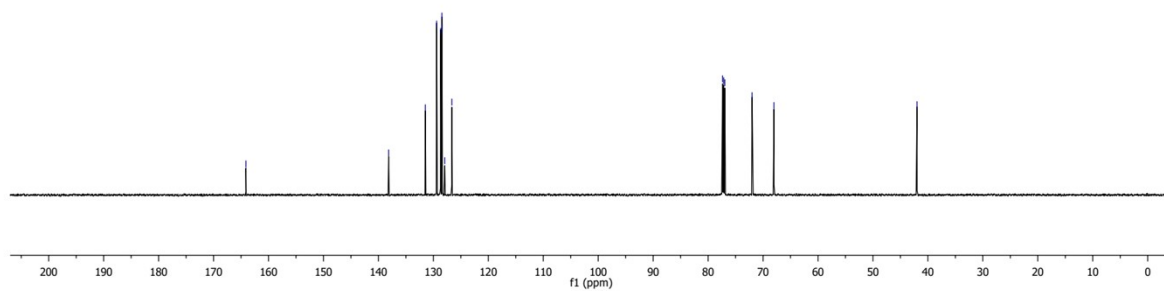

SBT-O-5ME-OX-DG-CHI-1H

7.940  
7.527  
7.466  
7.444  
7.404  
7.392  
7.260

4.855  
4.843  
4.837  
4.806  
4.153  
4.138  
4.114  
3.619  
3.607  
3.595  
3.583

1.419  
1.409

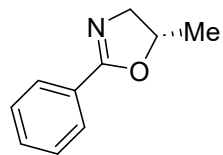

(S)-1o'

<sup>1</sup>H NMR (600 MHz, CDCl<sub>3</sub>)

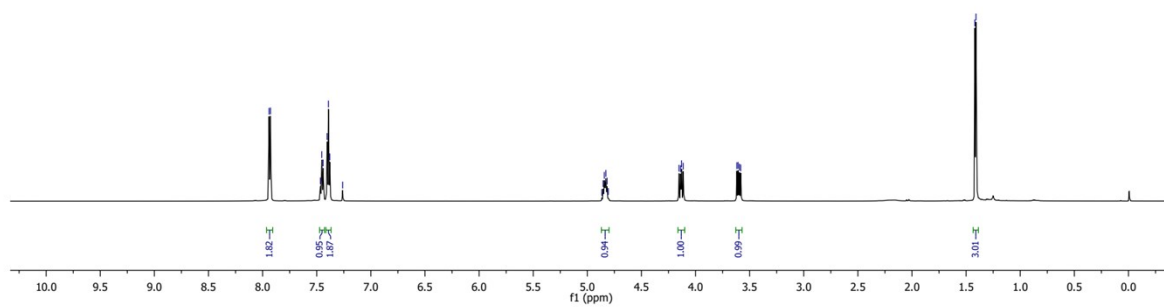

SBT-O-5ME-OX-DG-CHI-13C

163.064

131.271  
128.384  
128.197

77.271  
77.160  
76.948  
76.837

61.718

21.228

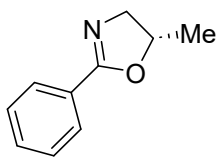

(S)-1o'

<sup>13</sup>C NMR (150 MHz, CDCl<sub>3</sub>)

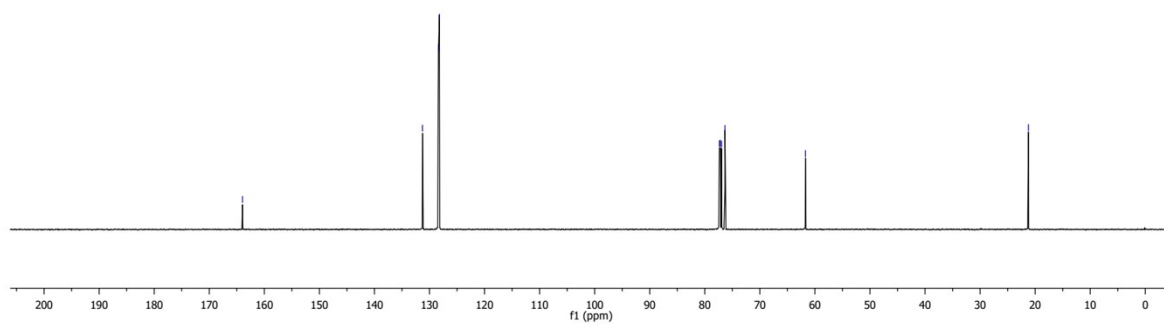

SBT-4vitE-OX-DG-1H

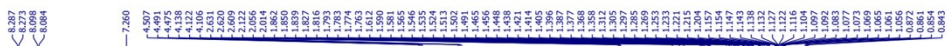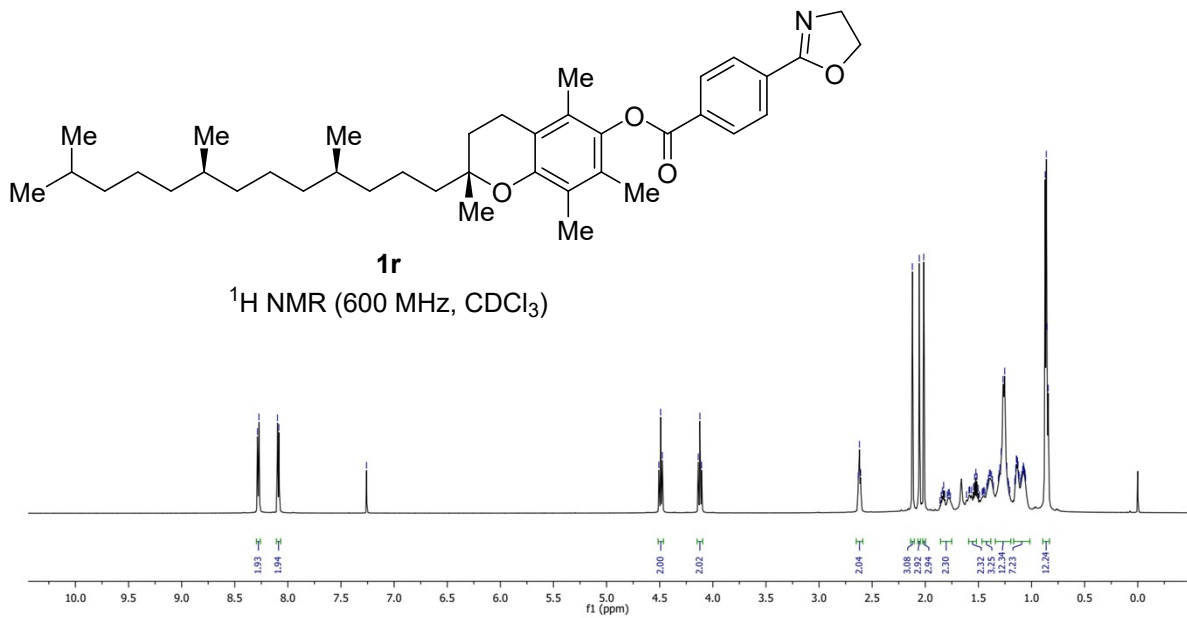

SBT-4vitE-OX-DG-13C

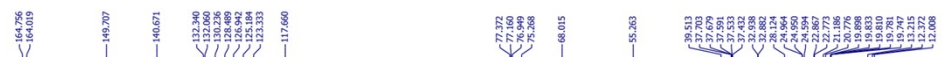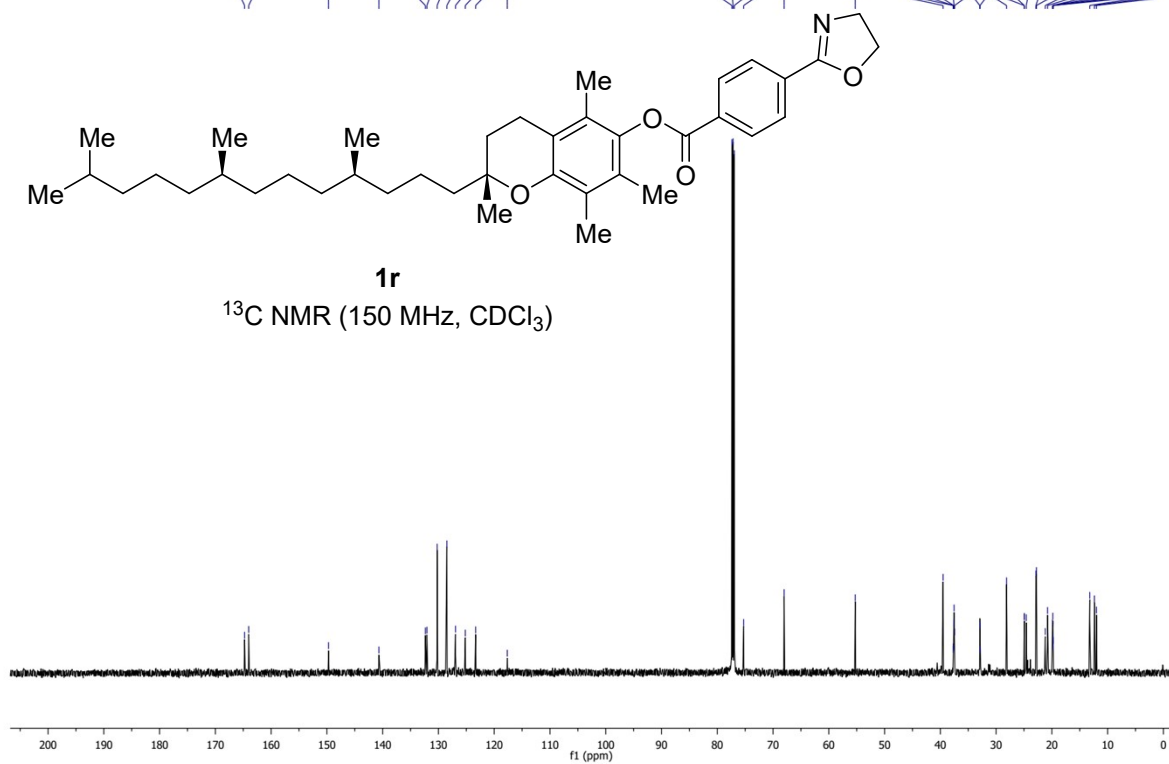

SBT-4CHOL-OX-DG-1H

8.081  
8.067  
-8.008  
-7.960  
-7.950  
-5.425  
-4.978  
-4.871  
-4.864  
-4.668  
-4.112  
-4.096  
-3.970  
-2.977  
-2.864  
-2.803  
-2.637  
-2.602  
-2.506  
-1.987  
-1.978  
-1.978  
-1.933  
-1.937  
-1.910  
-1.904  
-1.898  
-1.882  
-1.882  
-1.761  
-1.756  
-1.738  
-1.733  
-1.540  
-1.529  
-1.518  
-1.518  
-1.502  
-1.502  
-1.476  
-1.465  
-1.465  
-1.469  
-1.440  
-1.440  
-1.396  
-1.381  
-1.381  
-1.368  
-1.356  
-1.339  
-1.328  
-1.328  
-1.320  
-1.320  
-1.289  
-1.289  
-1.267  
-1.267  
-1.252  
-1.252  
-1.210  
-1.210  
-1.205  
-1.194  
-1.184  
-1.184  
-1.165  
-1.165  
-1.142  
-1.142  
-1.136  
-1.136  
-1.127  
-1.127  
-1.124  
-1.124  
-1.110  
-1.110  
-1.094  
-1.094  
-1.077  
-1.077  
-1.056  
-1.056  
-1.044  
-1.044  
-1.034  
-1.034  
-0.990  
-0.990  
-0.993  
-0.993  
-0.975  
-0.975  
-0.966  
-0.966  
-0.915  
-0.915  
-0.873  
-0.873  
-0.862  
-0.862  
-0.858  
-0.858

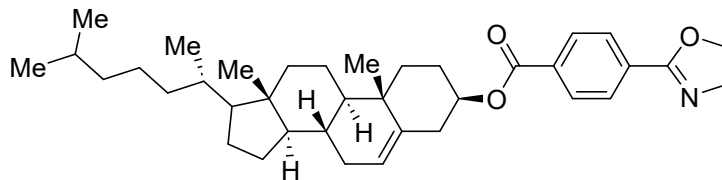

**1s**

<sup>1</sup>H NMR (600 MHz, CDCl<sub>3</sub>)

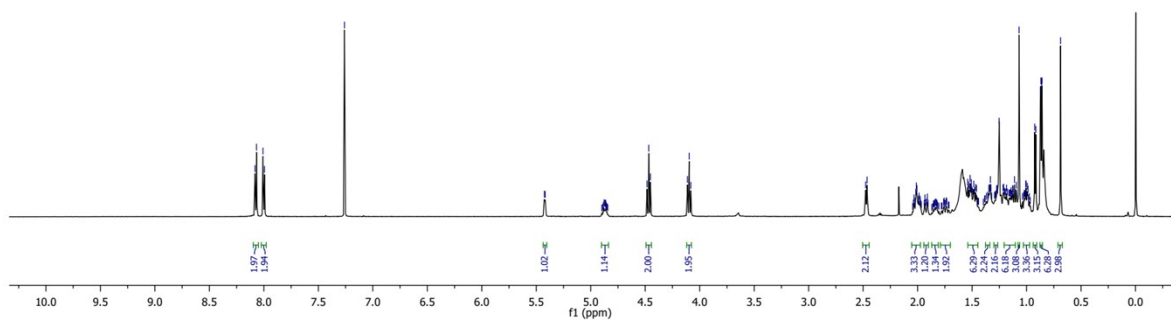

SBT-4CHOL-OX-DG-13C

165.531  
164.186  
139.718  
133.355  
131.672  
128.237  
123.096  
77.372  
77.372  
76.948  
75.145  
67.977  
56.862  
56.310  
55.193  
49.491  
39.904  
38.981  
37.182  
36.949  
35.954  
32.097  
28.388  
28.019  
24.452  
22.989  
22.715  
19.526  
18.880  
12.022

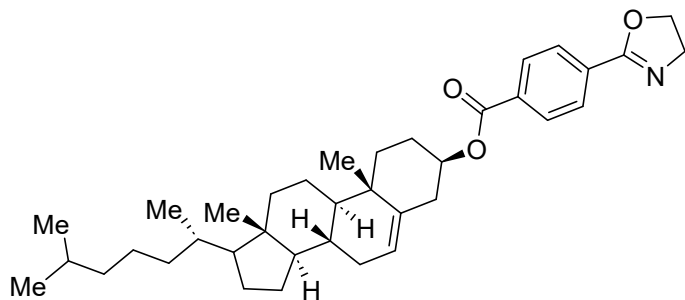

**1s**  
<sup>13</sup>C NMR (150 MHz, CDCl<sub>3</sub>)

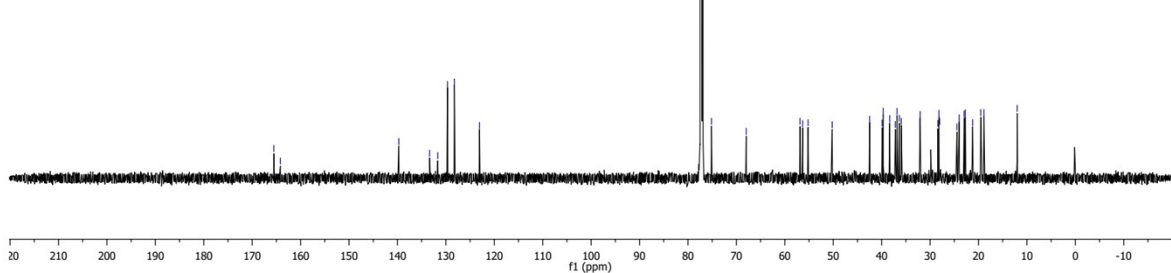





SBT-SPMP-PYTR-1H

8.833  
8.831  
8.813  
8.370  
8.368  
8.350  
7.684  
7.662  
7.596  
7.582  
7.578  
7.560  
7.061  
7.039

4.061  
3.891

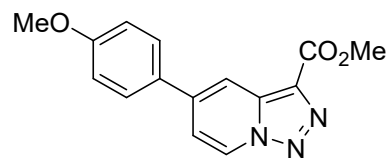

**2c**

<sup>1</sup>H NMR (400 MHz, CDCl<sub>3</sub>)

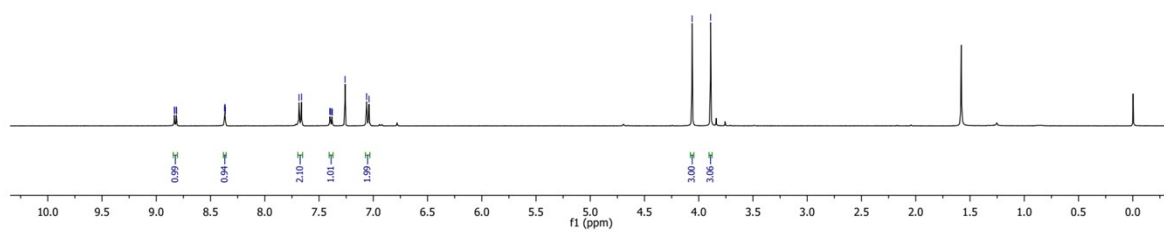

SBT-SPMP-PYTR-13C

162.169  
161.960  
152.479  
135.985  
129.411  
128.692  
128.662  
128.857  
116.345  
114.956  
114.484

77.372  
77.049

55.631  
52.225

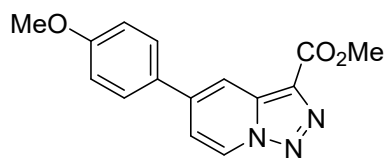

**2c**

<sup>13</sup>C NMR (150 MHz, CDCl<sub>3</sub>)

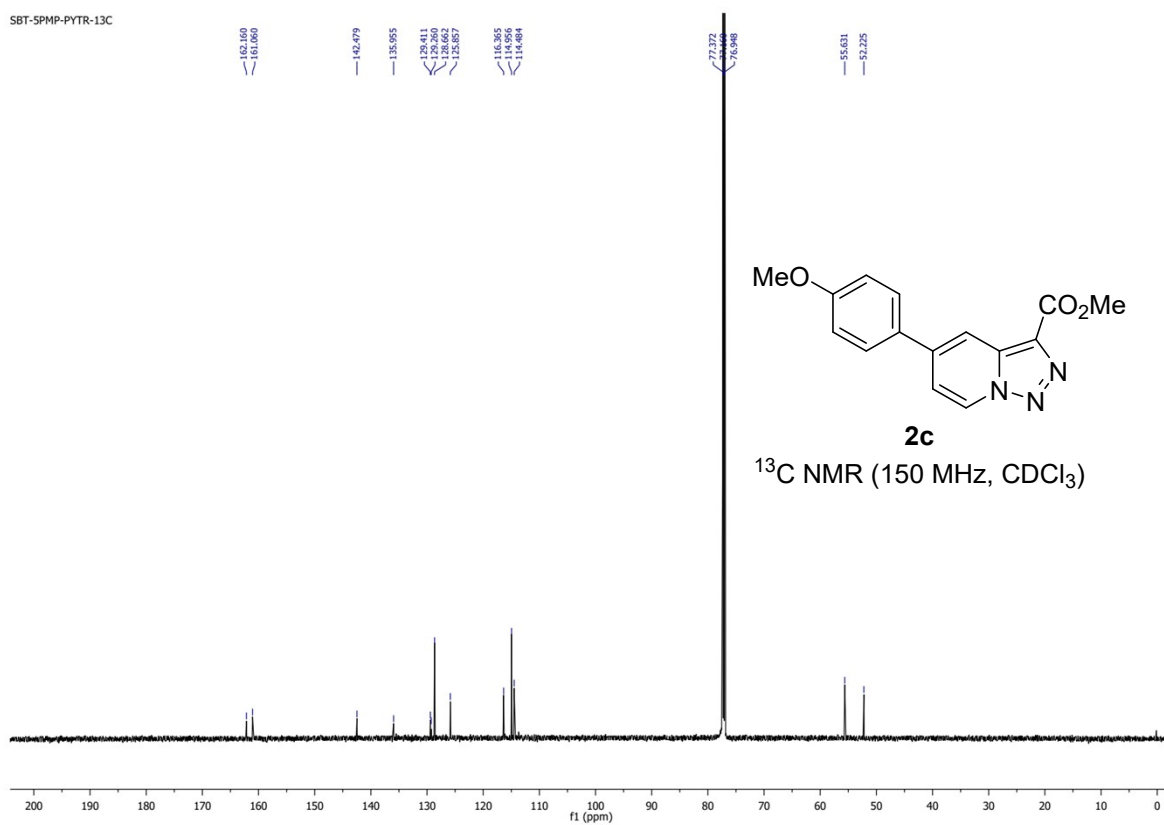

SBT-6-3Thenyl-PYTR-1H

9.009  
8.228  
7.816  
7.804  
7.799  
7.638  
7.633  
7.531  
7.528  
7.526  
7.520  
7.428  
7.426  
7.420  
7.418  
7.280  
4.058

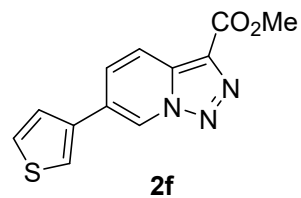

<sup>1</sup>H NMR (600 MHz, CDCl<sub>3</sub>)

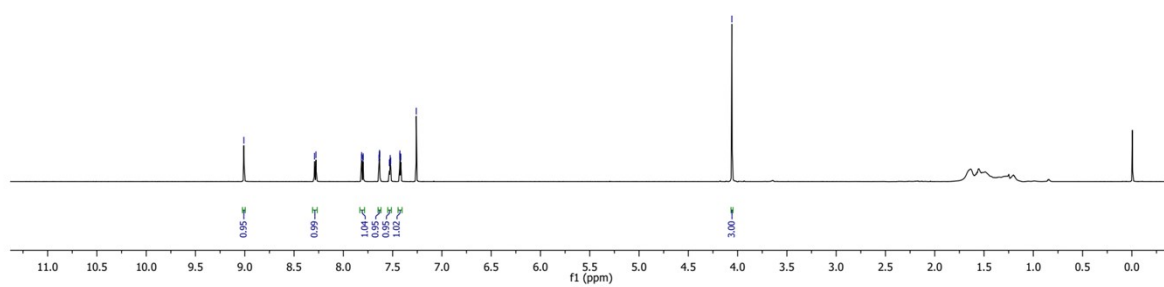

SBT-6-3Thenyl-PYTR-13C

161.935  
136.268  
134.148  
129.604  
129.475  
129.472  
126.110  
125.678  
122.103  
119.170  
77.371  
76.946  
52.299

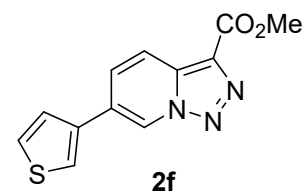

<sup>13</sup>C NMR (150 MHz, CDCl<sub>3</sub>)

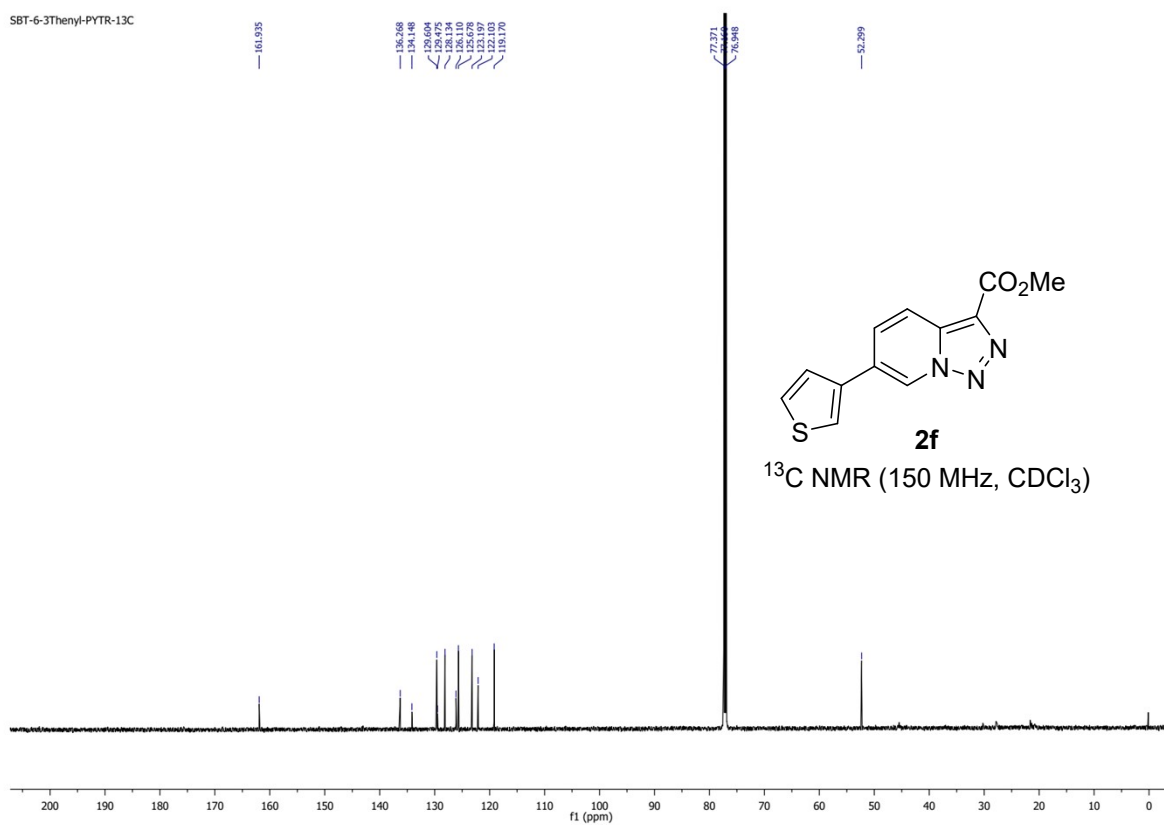

SBT-6PhCF3-PYTR-1H

9.026  
8.383  
8.365  
7.835  
7.835  
7.812  
7.795  
7.795  
7.794  
7.691  
7.678  
7.260

4.074

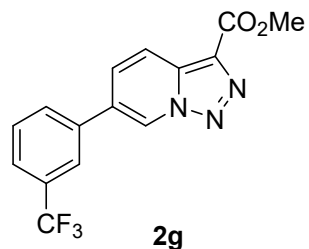

<sup>1</sup>H NMR (600 MHz, CDCl<sub>3</sub>)

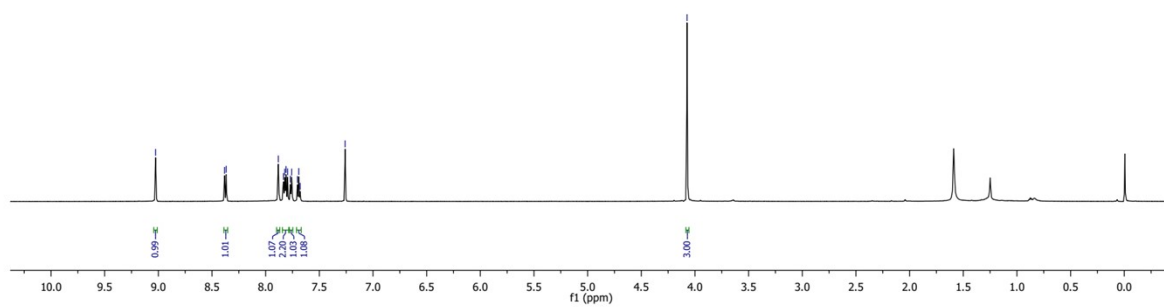

SBT-6PhCF3-PYTR-13C

161.857

156.466  
156.466  
152.276  
152.276  
132.794  
131.425  
130.951  
129.856  
129.222  
126.114  
126.099  
126.641  
126.762  
124.314  
124.299  
123.389  
122.955  
123.955

77.372

52.376

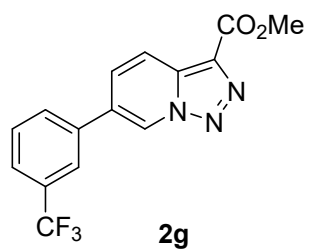

<sup>13</sup>C NMR (150 MHz, CDCl<sub>3</sub>)

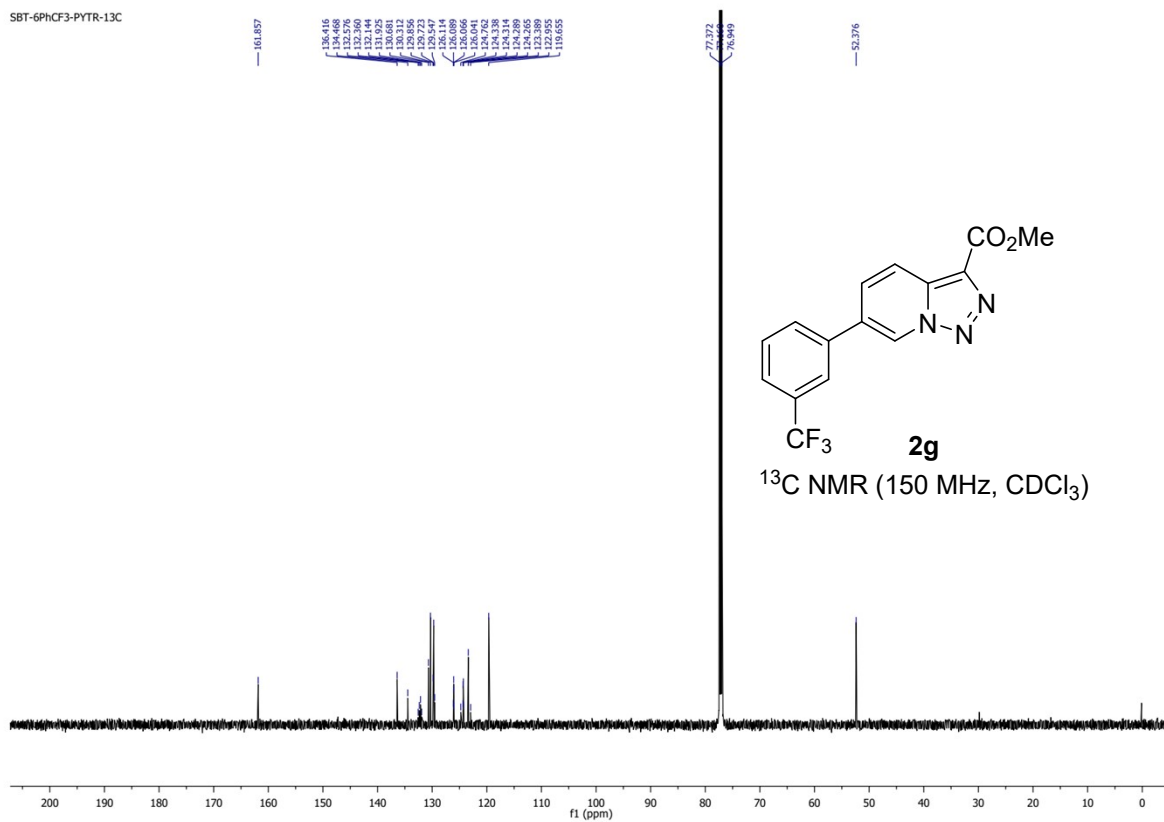

SBT-6PhCF3-PYTR-19F

-62.742

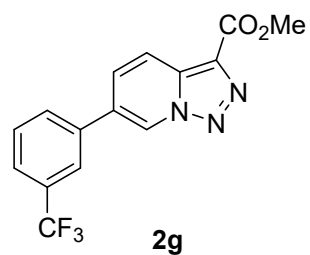

<sup>19</sup>F NMR (565 MHz, CDCl<sub>3</sub>)

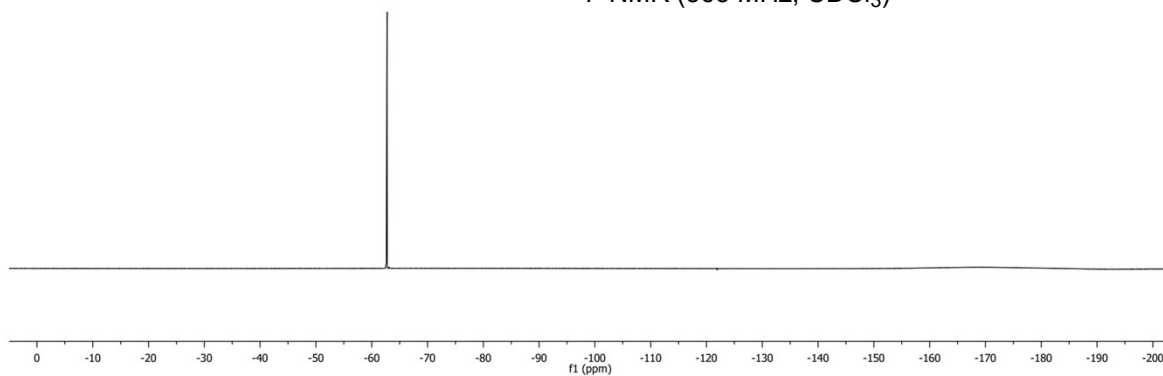

SBT-6SESA-PYTR-1H

-8.004

8.294  
8.279

7.794  
7.779

7.260  
7.106

7.081  
6.985

6.924

-6.008

-4.060

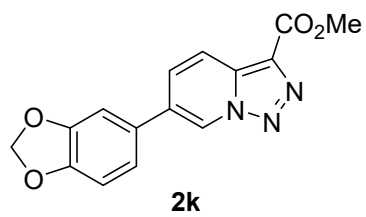

<sup>1</sup>H NMR (600 MHz, CDCl<sub>3</sub>)

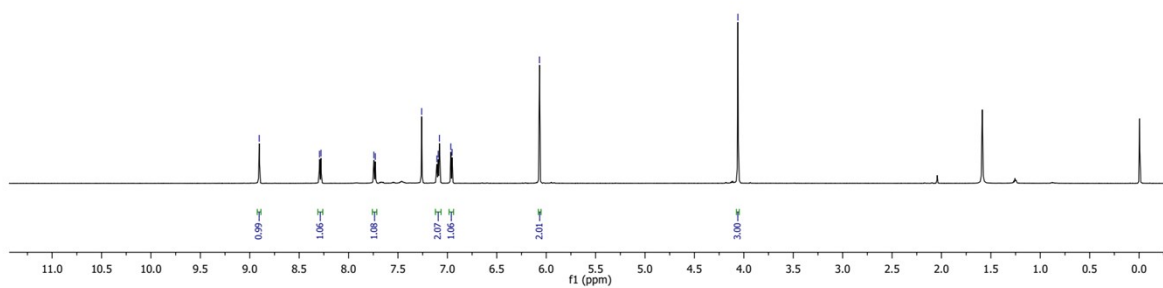

SBT-6SESA-PYTR-13C

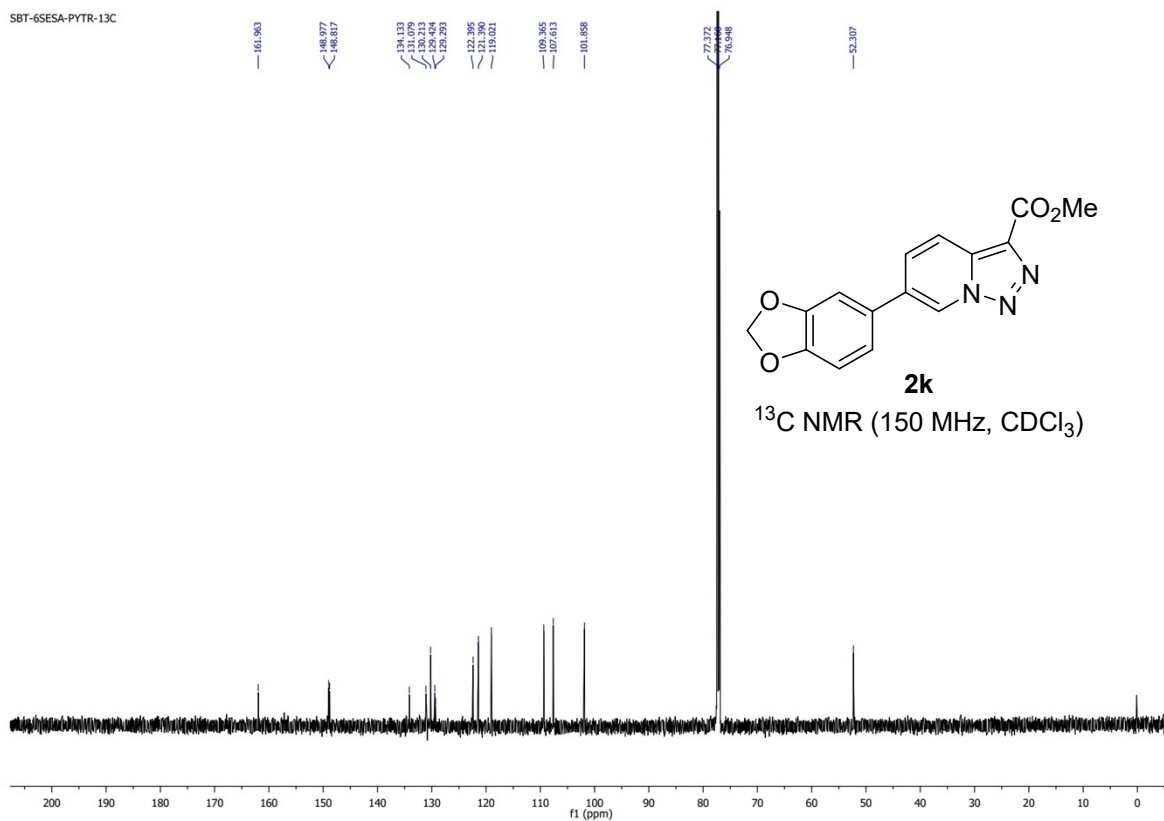

SBT-OXA-PYTR-1H

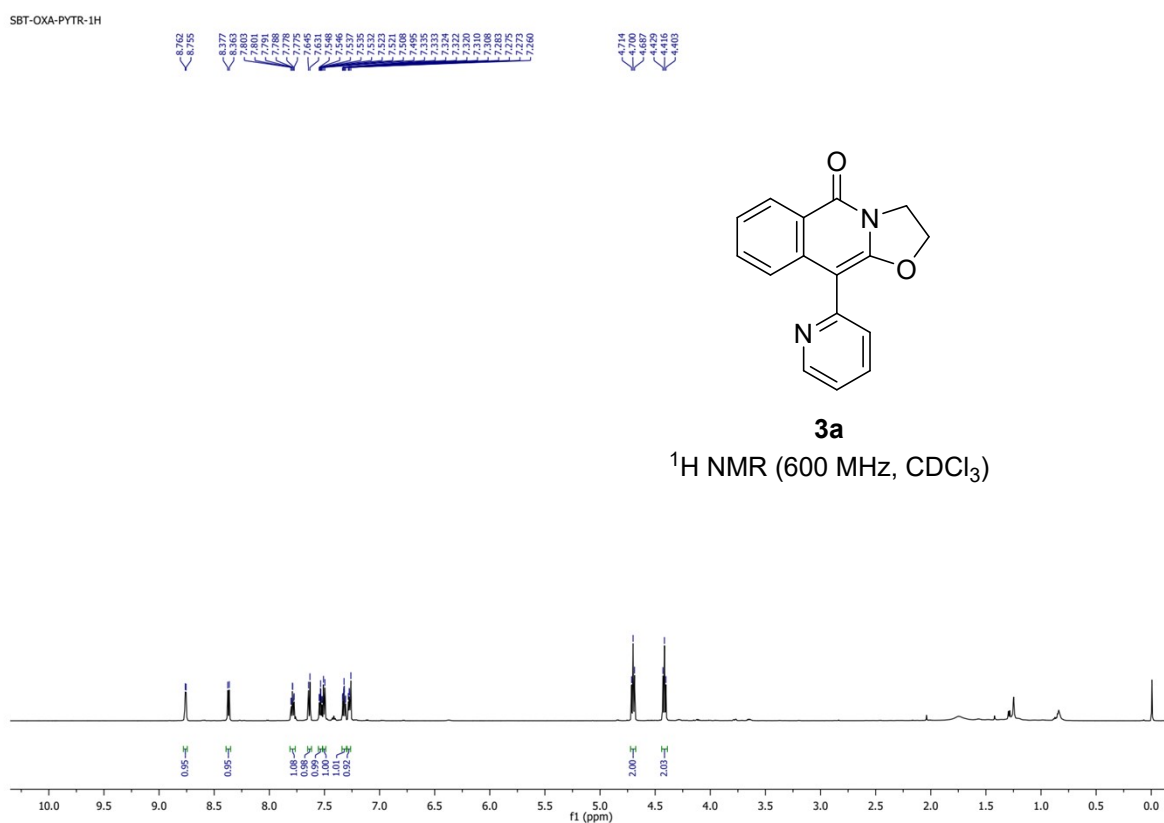

SBT-OXA-PYTR-13C

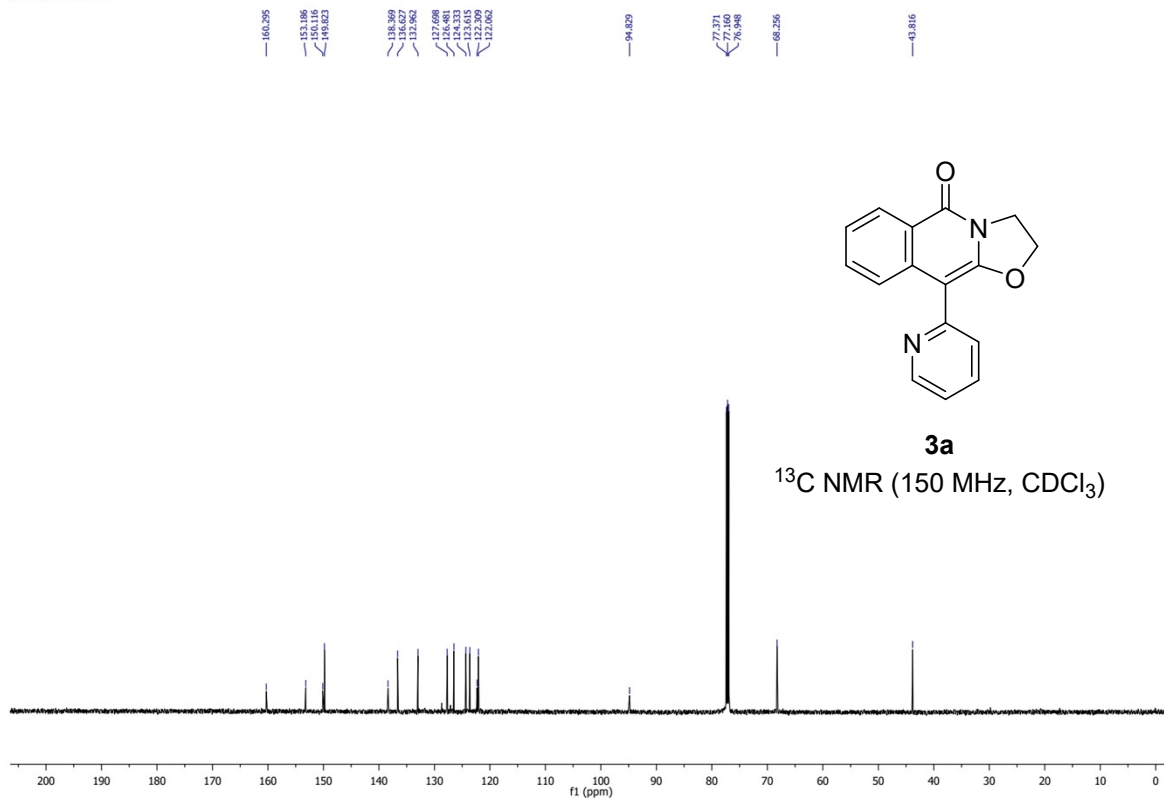

SBT-2F-OXA-PYTR-1H

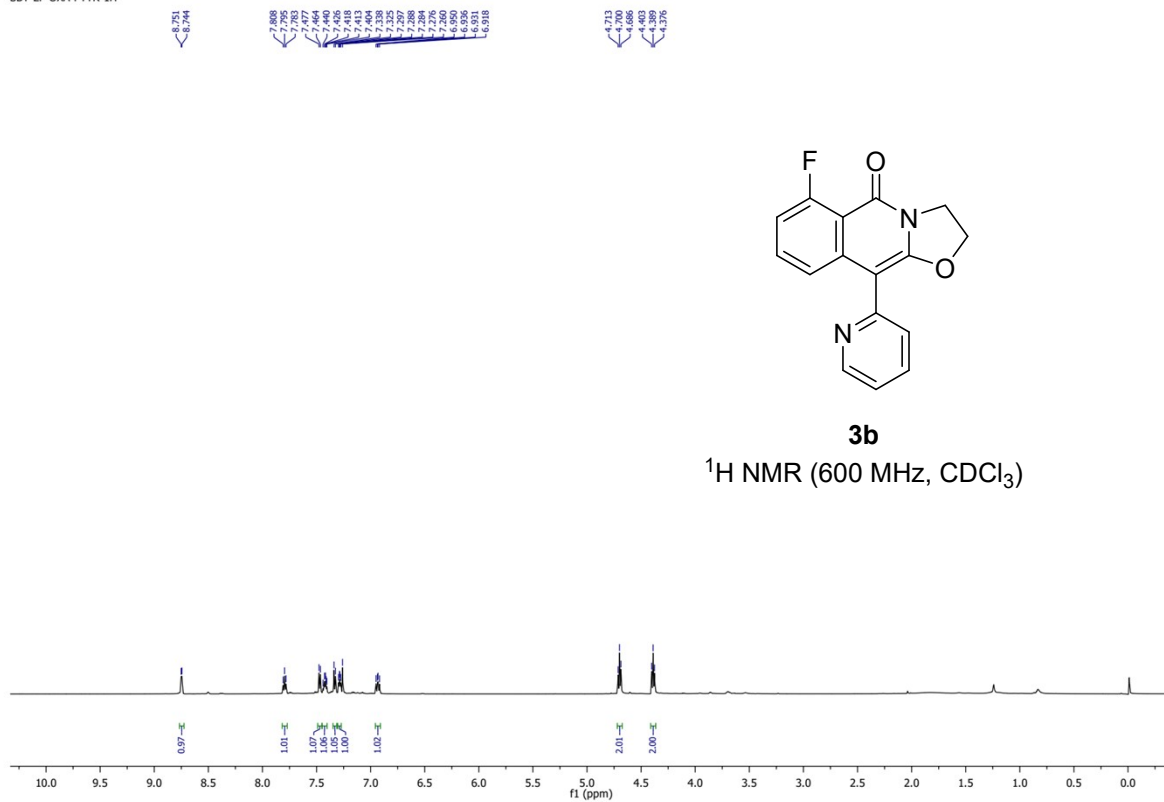

SBT-2F-OXA-PYTR-13C

163.902  
162.161  
157.545  
153.918  
153.098  
150.824  
149.904  
141.374  
136.793  
133.602  
133.533  
126.989  
122.310  
118.385  
118.257  
111.673  
111.671  
111.671  
110.930

94.278

77.271  
77.000  
76.749

66.354

43.805

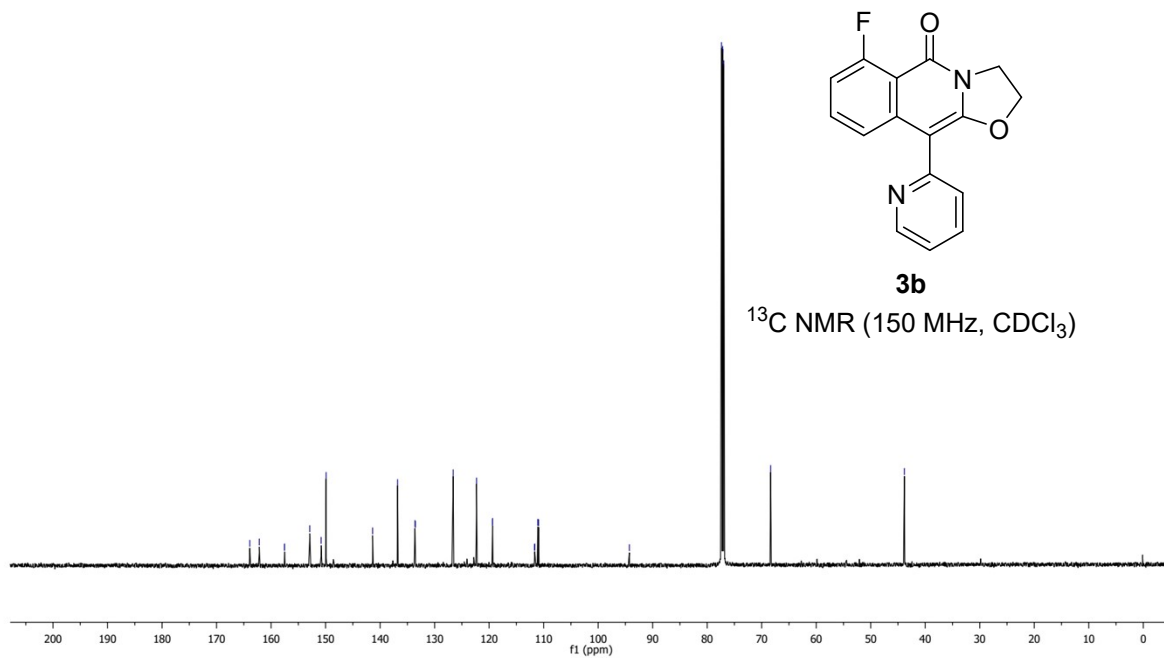

SBT-2F-OXA-PYTR-19F

111.528

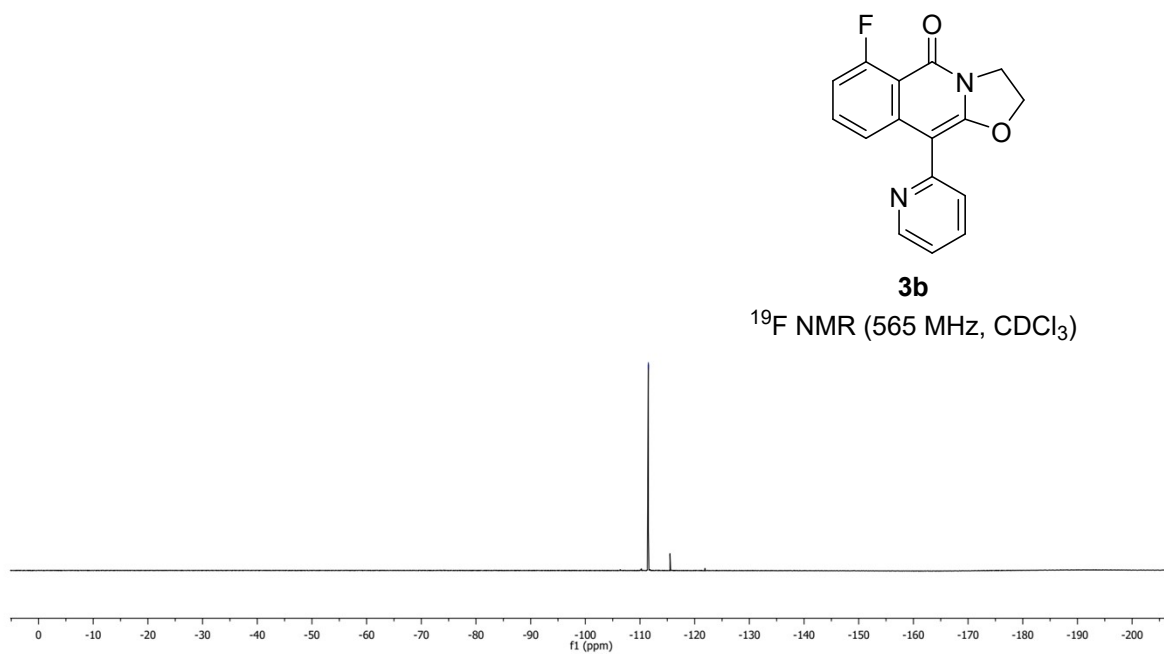



SBT-2ME-OXA-PYTR-1H

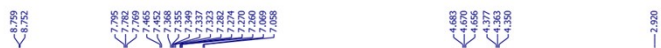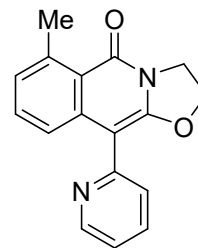

**3c**

<sup>1</sup>H NMR (600 MHz, CDCl<sub>3</sub>)

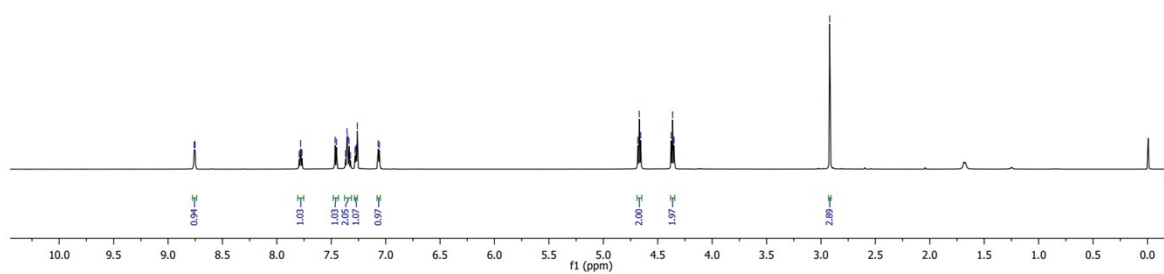

SBT-2ME-OXA-PYTR-13C

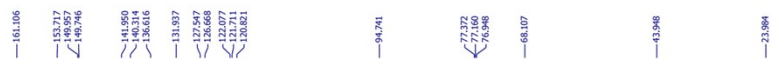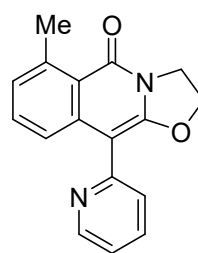

**3c**

<sup>13</sup>C NMR (150 MHz, CDCl<sub>3</sub>)

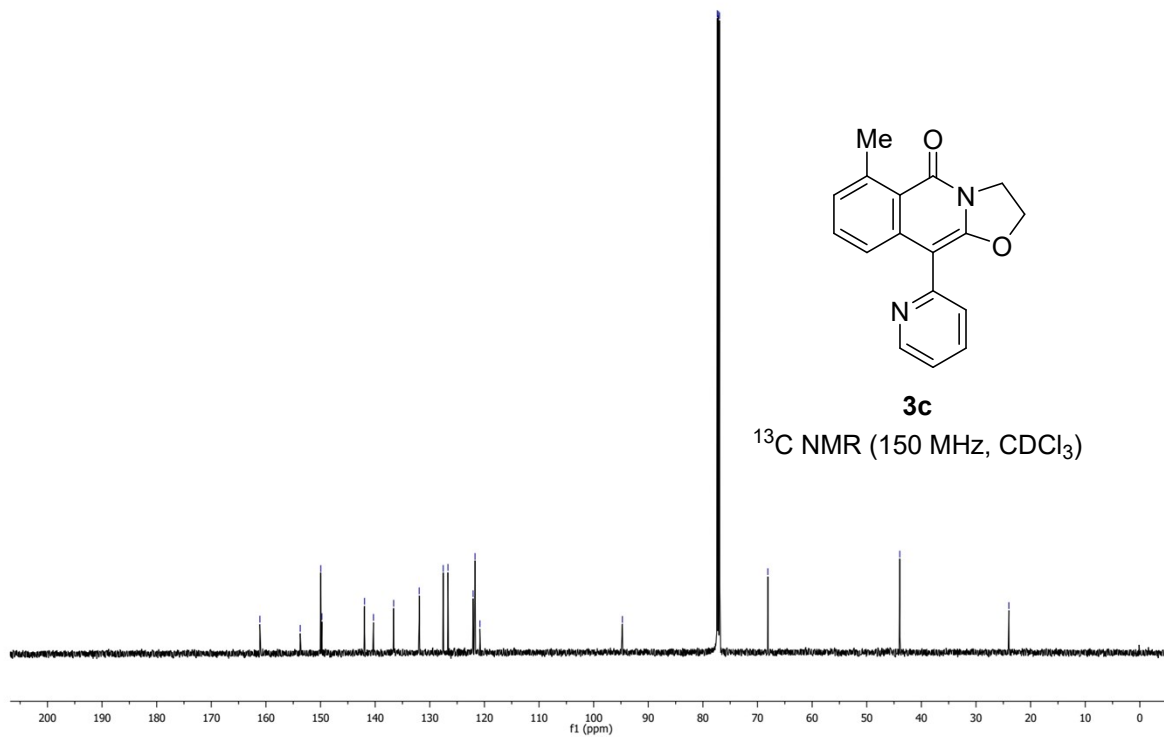

SBT-3ME-OXA-PYTR-1H

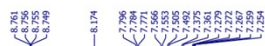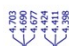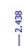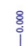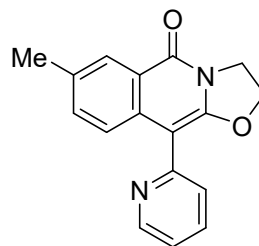

**3d**

<sup>1</sup>H NMR (600 MHz, CDCl<sub>3</sub>)

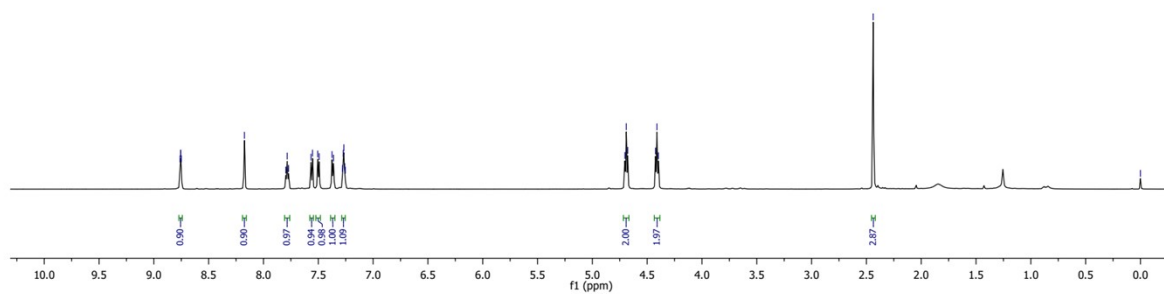

SBT-3ME-OXA-PYTR-13C

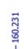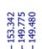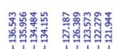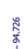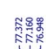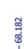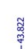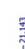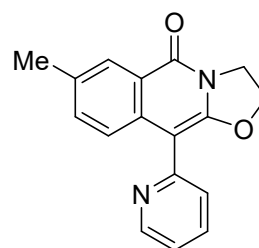

**3d**

<sup>13</sup>C NMR (150 MHz, CDCl<sub>3</sub>)

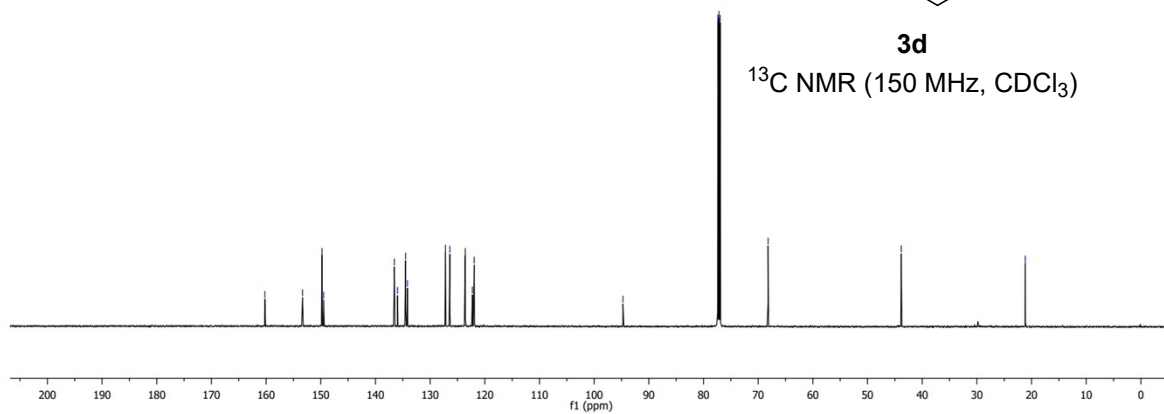

SBT-3CF3-OXA-PYTR-1H

8.771  
8.763  
8.644  
7.832  
7.819  
7.817  
7.804  
7.795  
7.775  
7.713  
7.698  
7.516  
7.310  
7.299  
7.260

4.778  
4.751  
4.655  
4.642

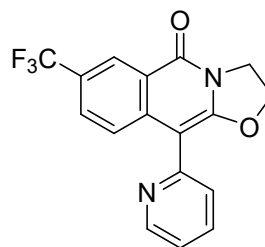

**3e**

<sup>1</sup>H NMR (600 MHz, CDCl<sub>3</sub>)

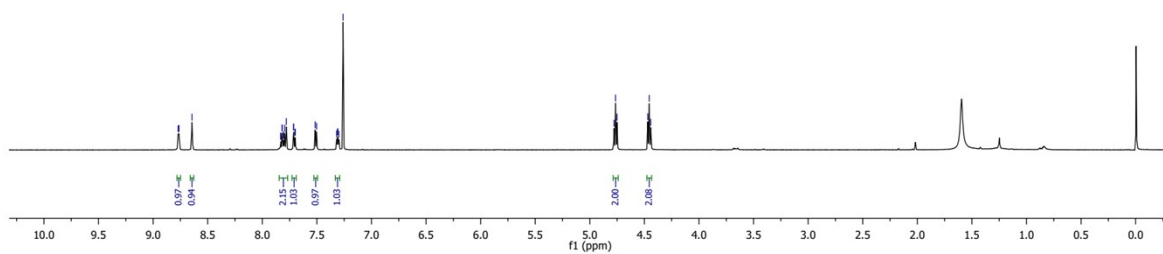

SBT-3CF3-OXA-PYTR-13C

159.614  
152.459  
151.865  
149.942  
141.044  
136.856  
136.903  
128.900  
128.962  
128.929  
128.196  
125.432  
125.405  
124.778  
122.394  
121.909

94.794

77.371  
76.848

68.605

43.899

126.003  
126.004  
126.939

126.421  
126.196

125.462  
125.433  
125.405  
125.376

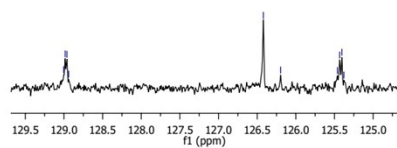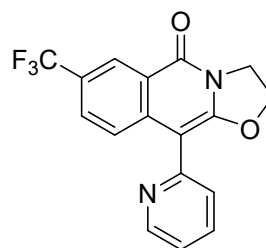

**3e**

<sup>13</sup>C NMR (150 MHz, CDCl<sub>3</sub>)

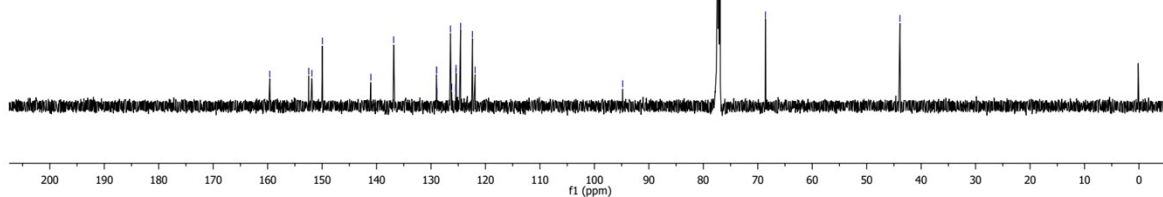

SBT-3CF3-OXA-PYTR-19F

—62.226

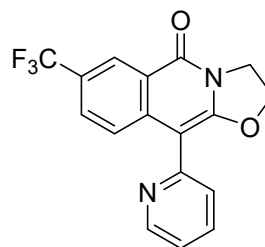

**3e**

<sup>19</sup>F NMR (565 MHz, CDCl<sub>3</sub>)

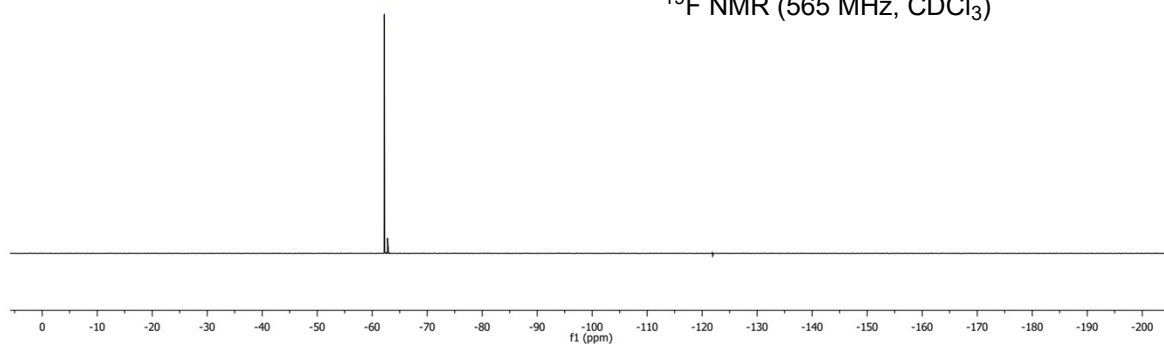

SBT-4OME-OXA-PYTR-1H

8.761  
8.755  
8.288  
8.284  
7.867  
7.794  
7.782  
7.779  
7.567  
7.283  
7.271  
7.273  
7.260  
7.260  
7.277  
6.912  
6.901  
6.897

4.711  
4.698  
4.684  
4.398  
4.381

—3.779

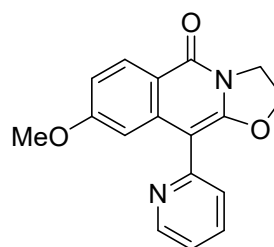

**3f**

<sup>1</sup>H NMR (600 MHz, CDCl<sub>3</sub>)

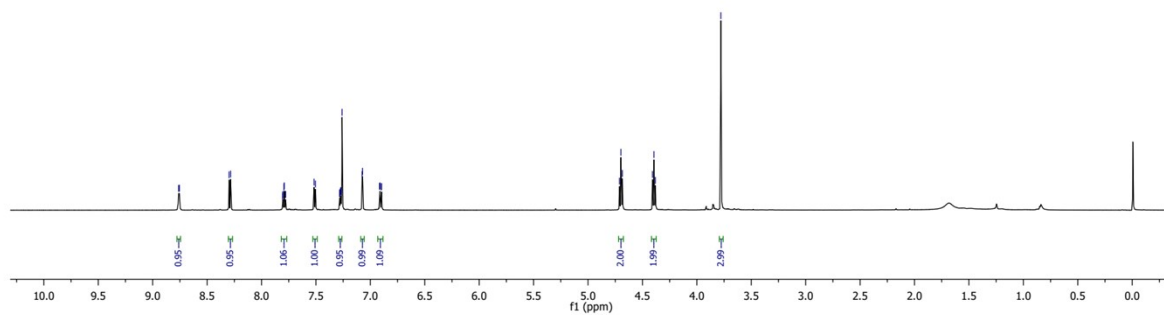

SBT-4OMe-OXA-PYTR-13C

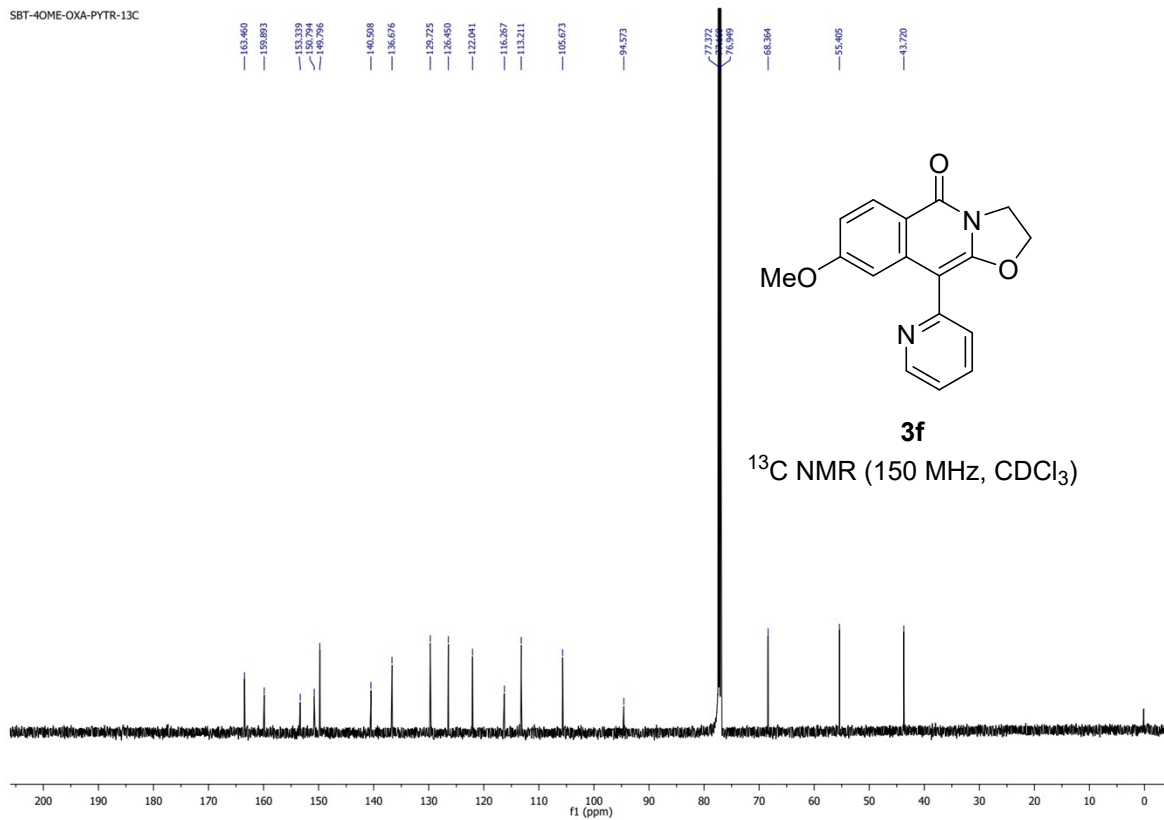

SBT-4Br-OXA-PYTR-1H

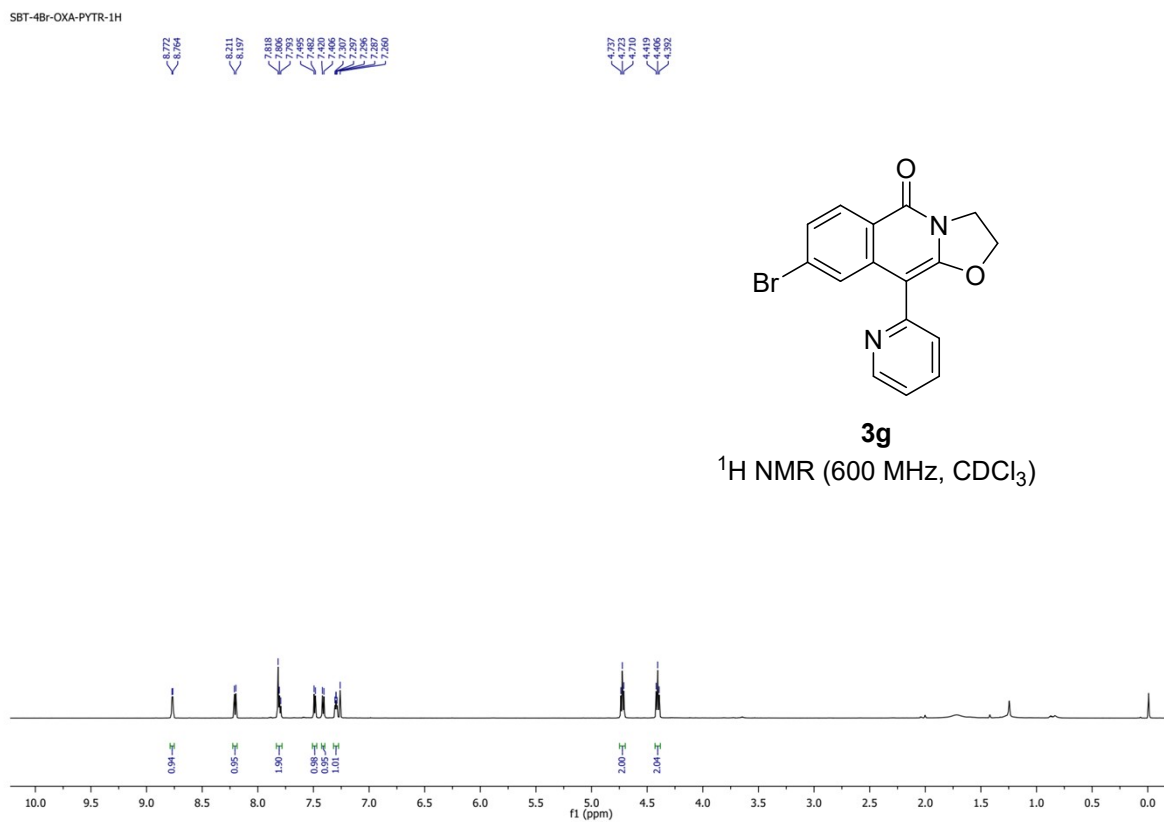

SBT-4Br-OXA-PYTR-13C

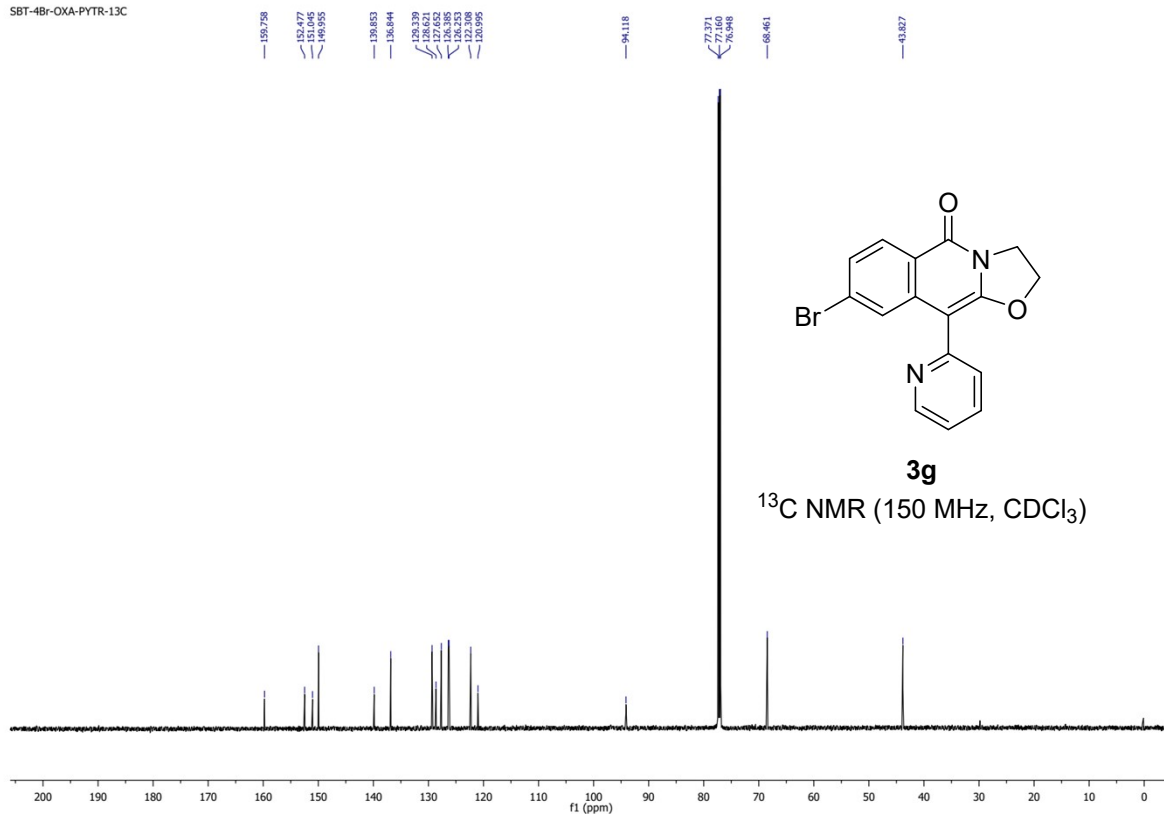

SBT-4Cl-OXA-PYTR-1H

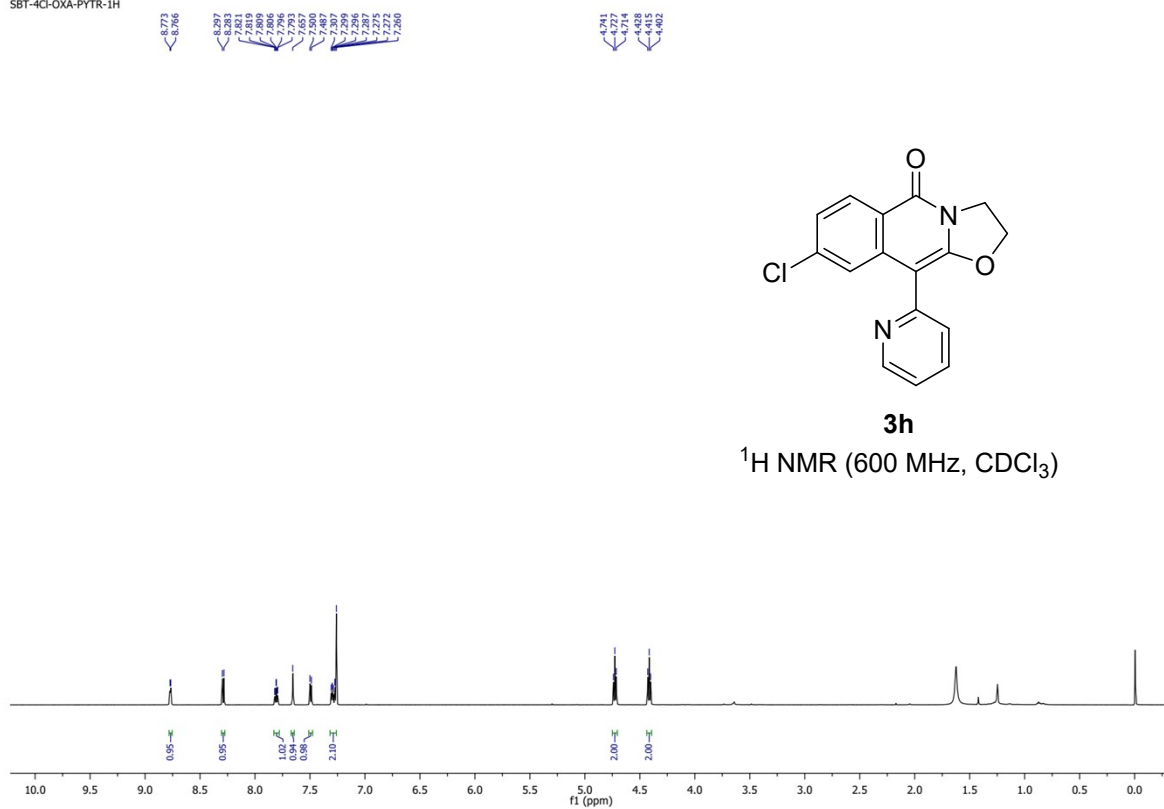



SBT-4ME-OXA-PYTR-13C

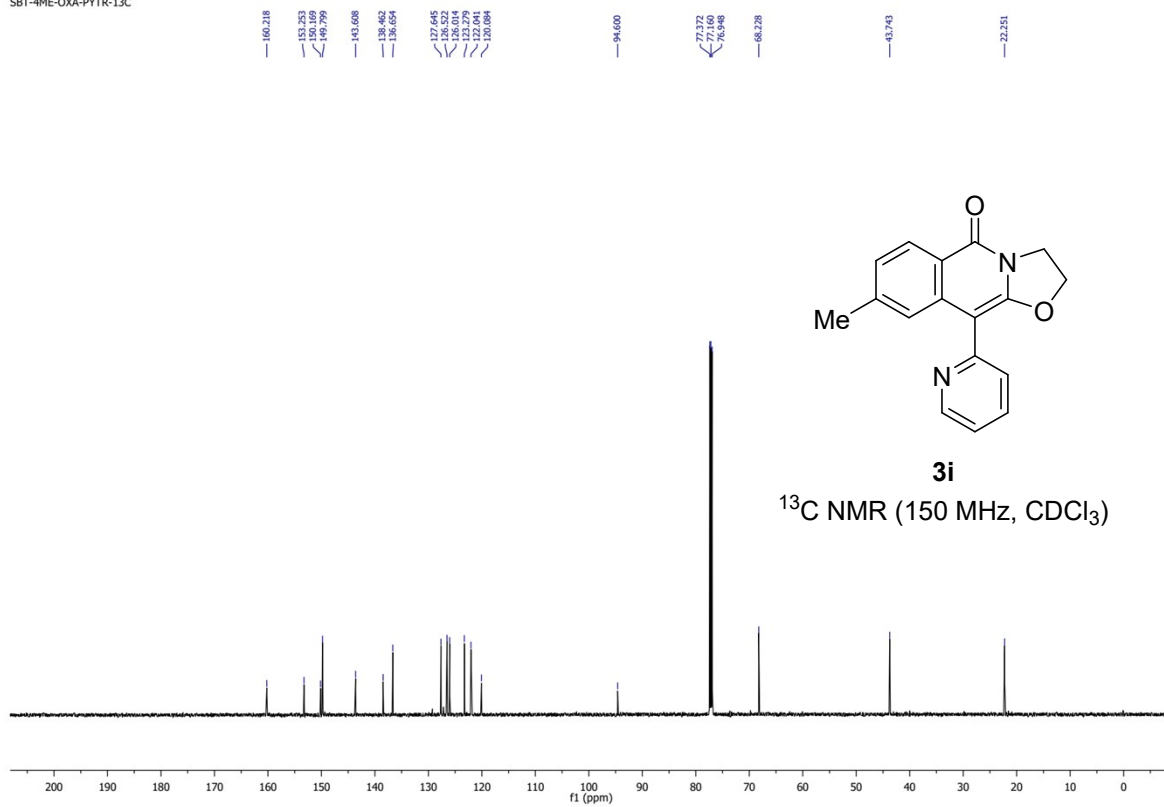

SBT-4NO2-OXA-PYTR-1H

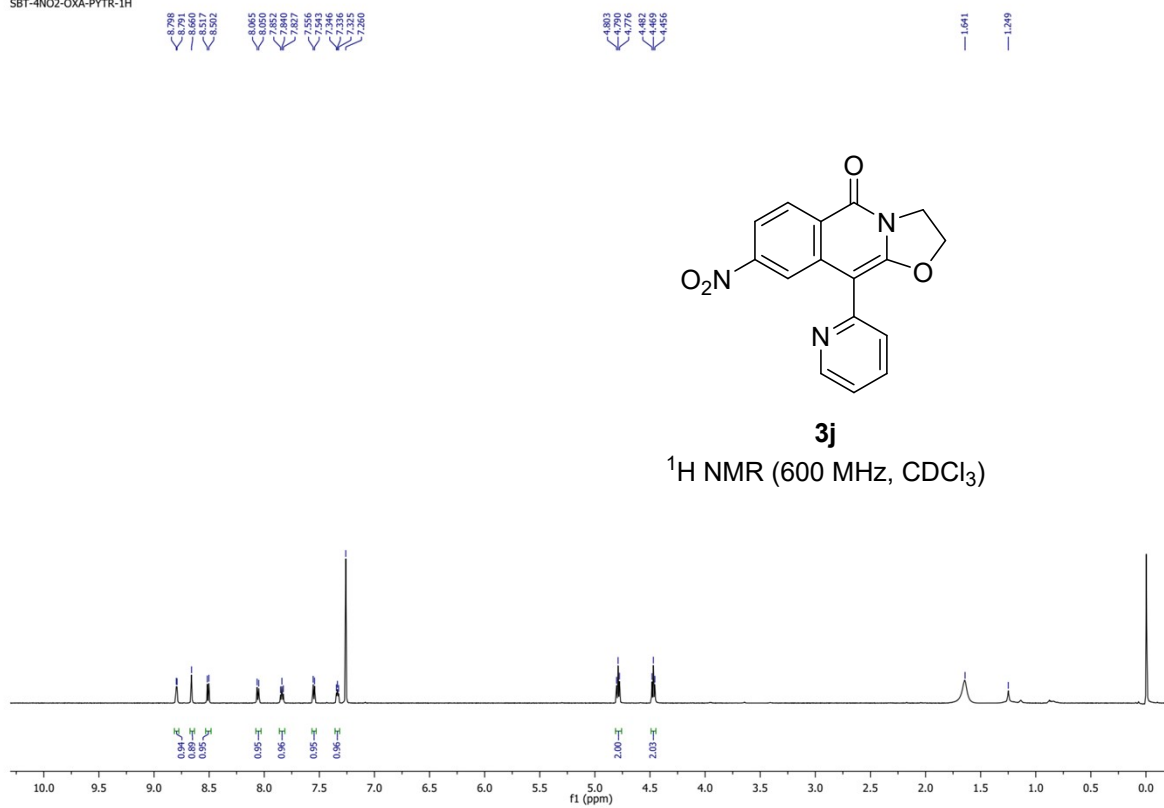



SBT-4NQ2-OXA-PYTR-1H

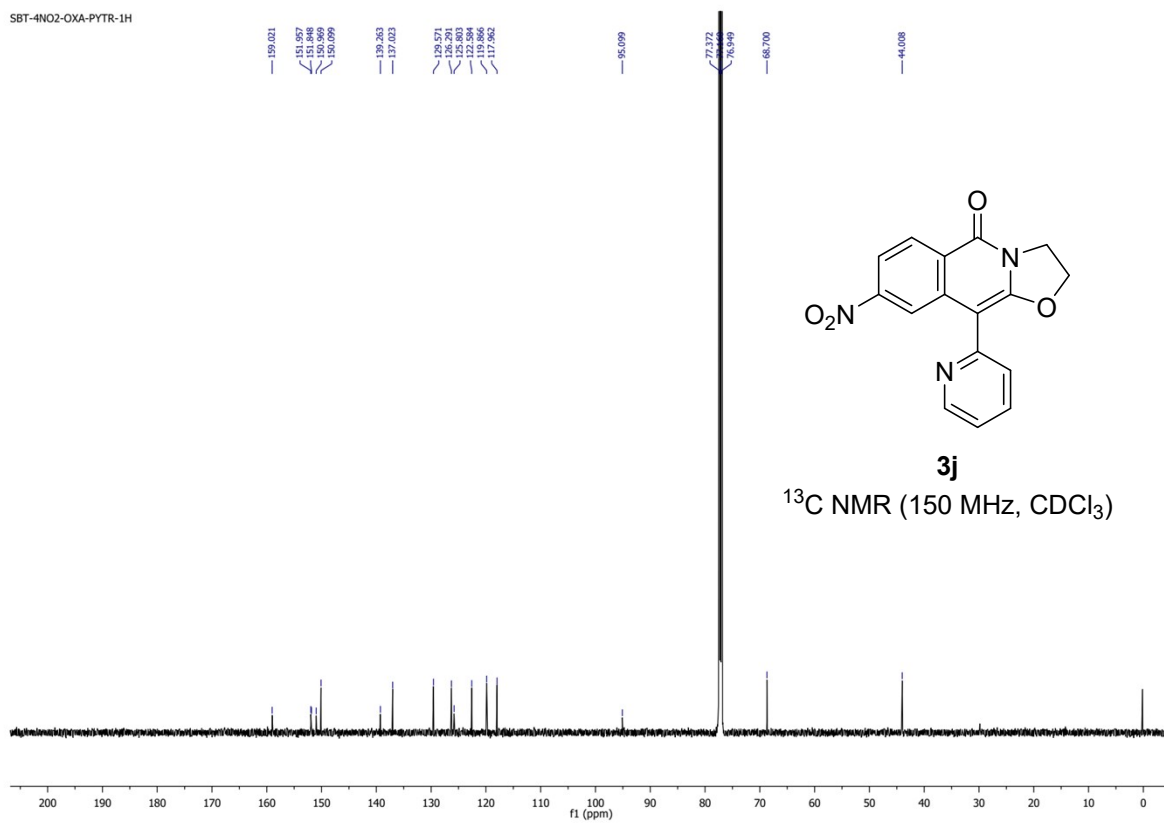

SBT-4MOR-OXA-PYTR-1H

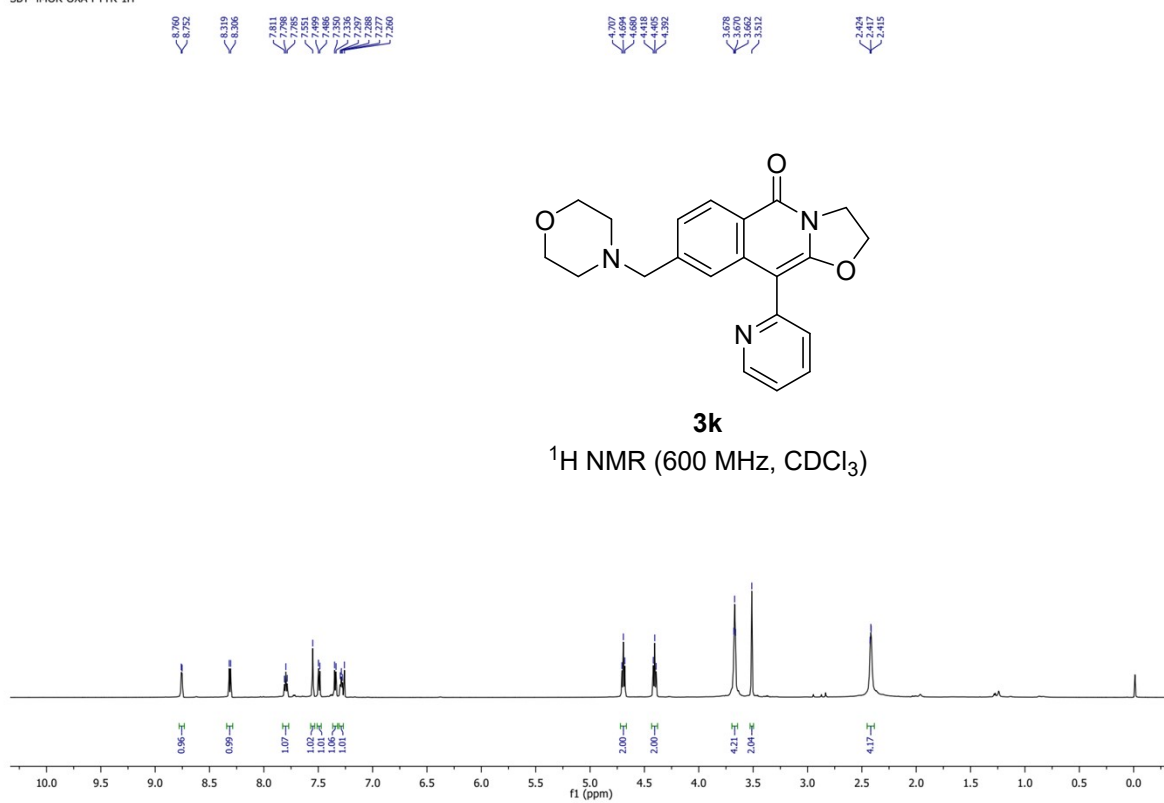

SBT-4MOR-OXA-PYTR-13C

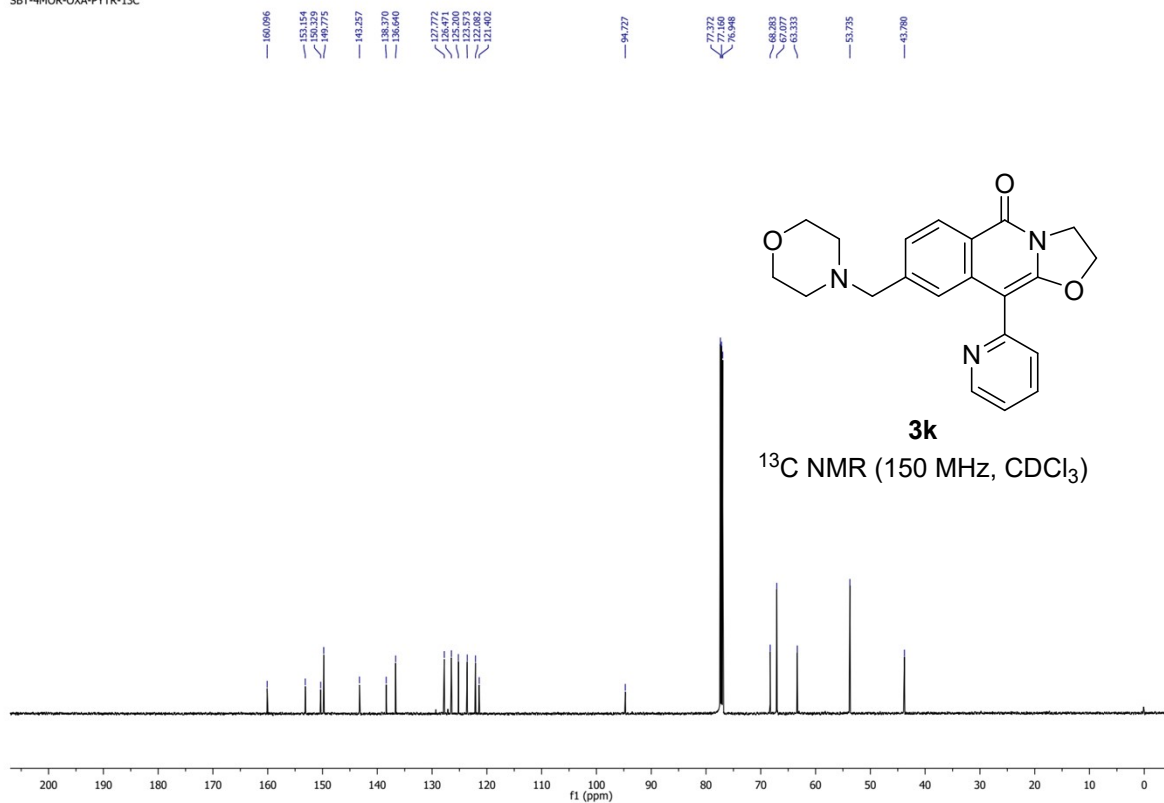

SBT-4OXAZOLE-OXA-PYTR-1H

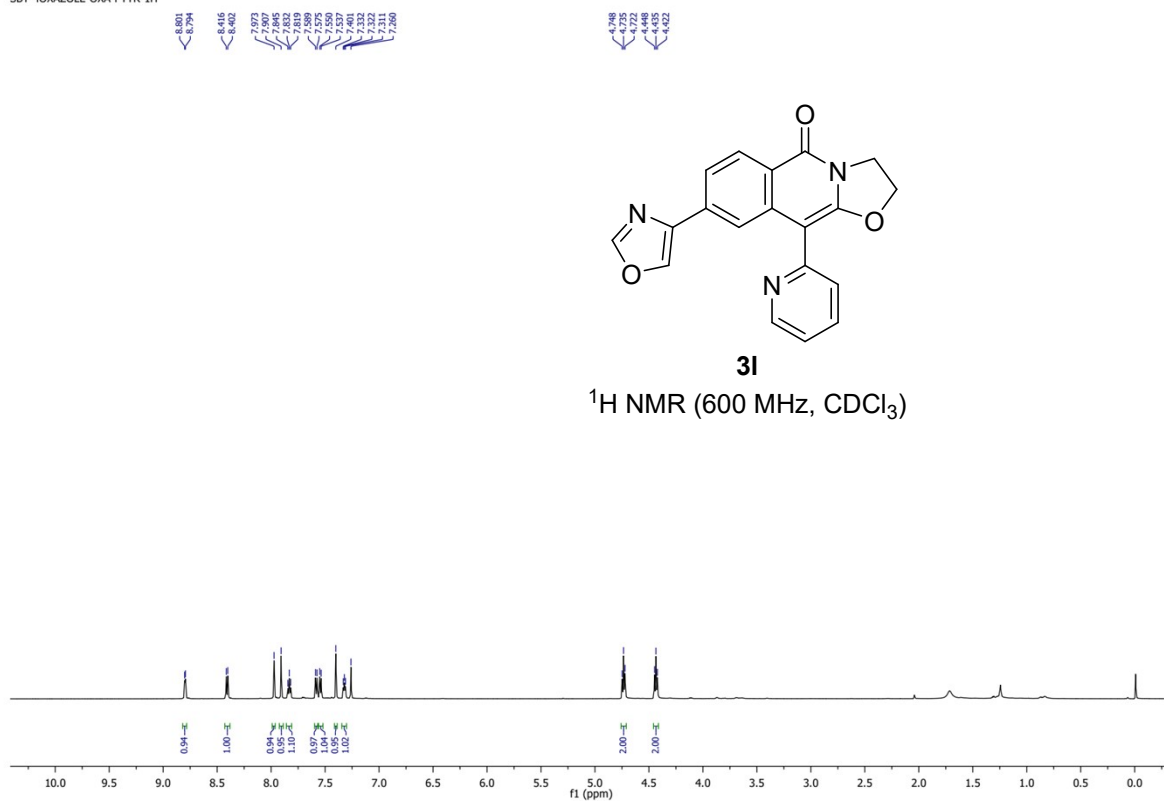

SBT-4OXAZOLE-OXA-PYTR-13C

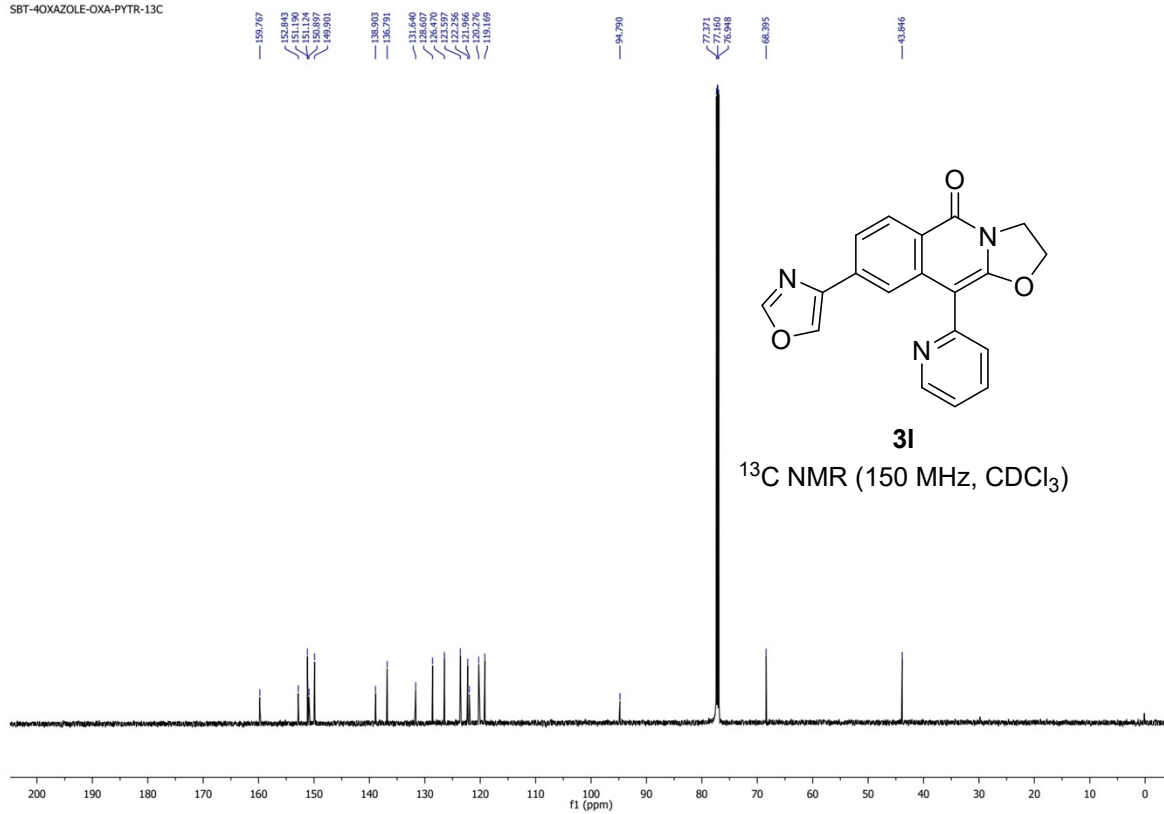

SBT-NAPH-OXA-PYTR-P2-1H

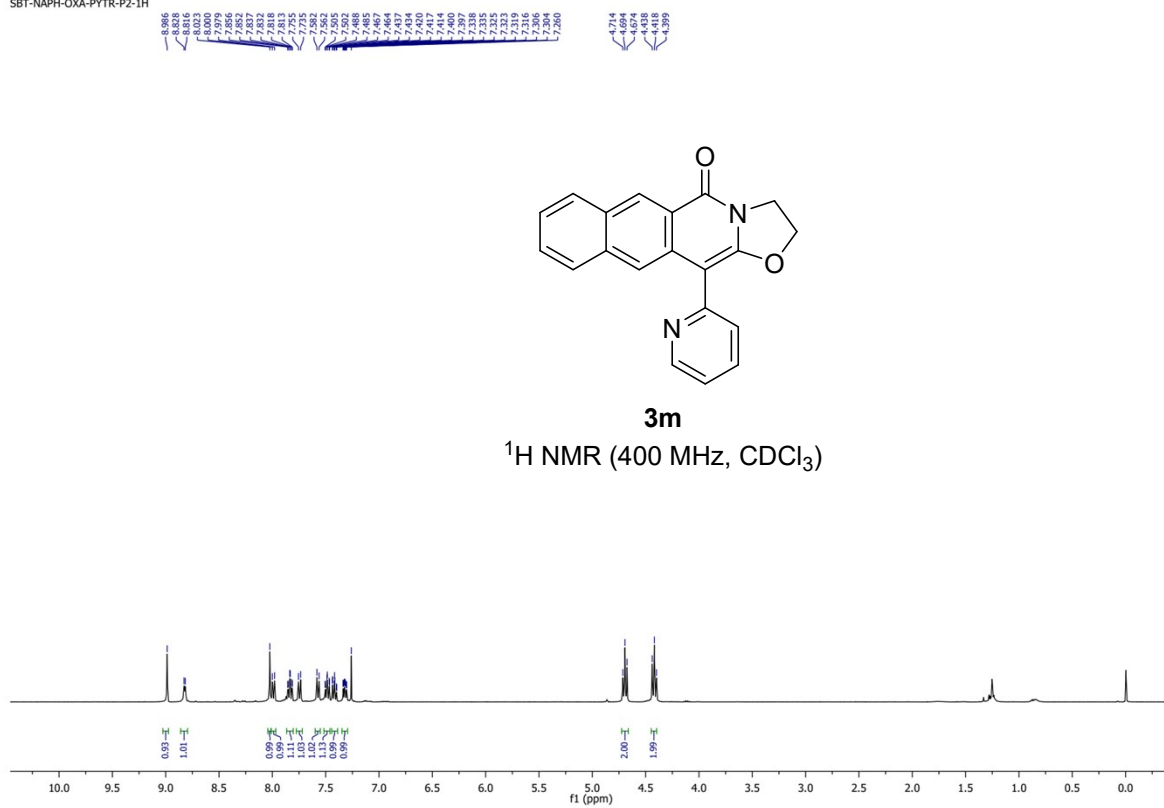

SBT-NAPH-OXA-PYTR-P2-13C

160.925  
153.520  
149.889  
149.366  
136.746  
136.032  
133.855  
133.855  
129.440  
129.440  
127.719  
127.719  
126.603  
126.603  
121.917  
121.442  
93.867  
77.371  
77.160  
76.948  
68.220  
43.610

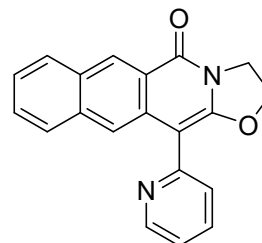

**3m**

$^{13}\text{C}$  NMR (150 MHz,  $\text{CDCl}_3$ )

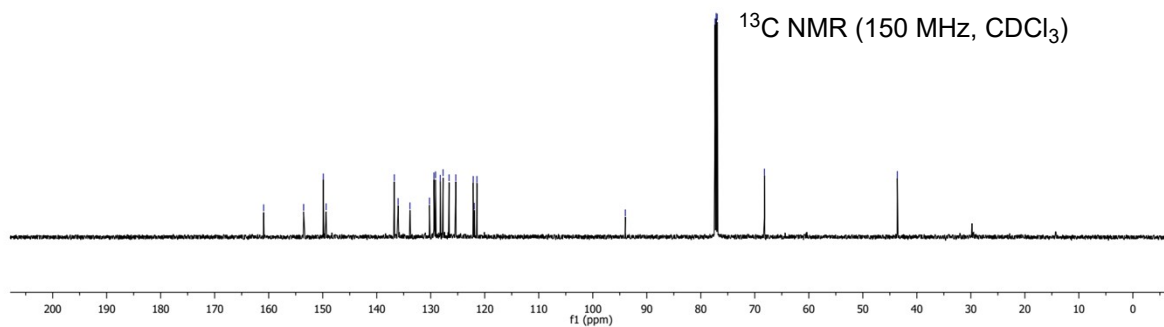

SBT-3-O-Bn-OXA-PYTR-CHI-1H

8.726  
8.728  
8.413  
8.400  
7.770  
7.752  
7.695  
7.648  
7.548  
7.520  
7.350  
7.331  
7.312  
7.296  
7.280  
7.265  
7.252  
7.232  
7.221  
5.122  
5.108  
5.094  
4.483  
4.468  
4.452  
4.438  
4.424  
3.619  
3.616  
3.597  
3.595  
2.979  
2.957  
2.941

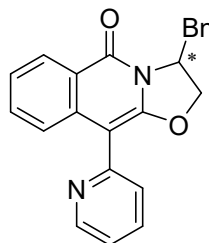

**(+)-3n**

$^1\text{H}$  NMR (600 MHz,  $\text{CDCl}_3$ )

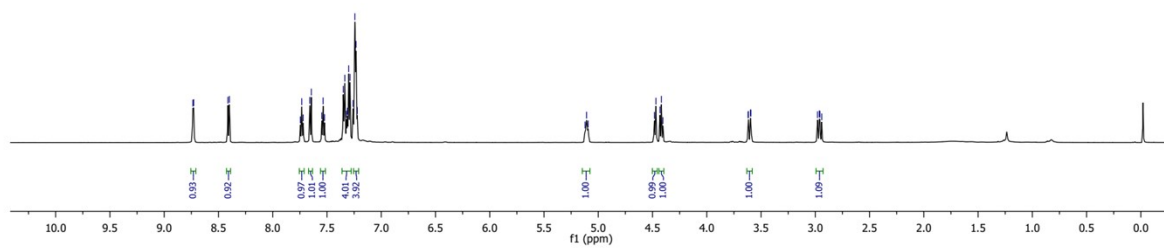

SBT-391-3-O-Bn-OXA-PYTR-CHI-13C

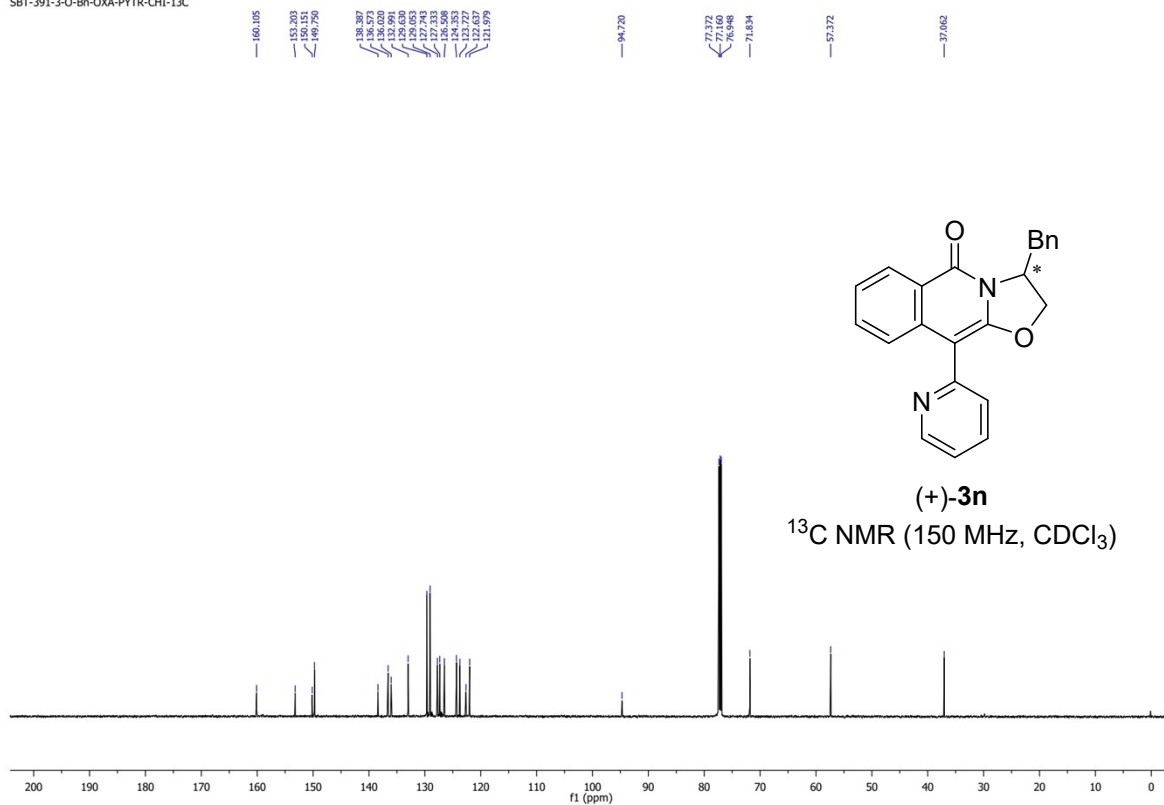

SBT-2-O-ME-OXA-PYTR-RAC-1H

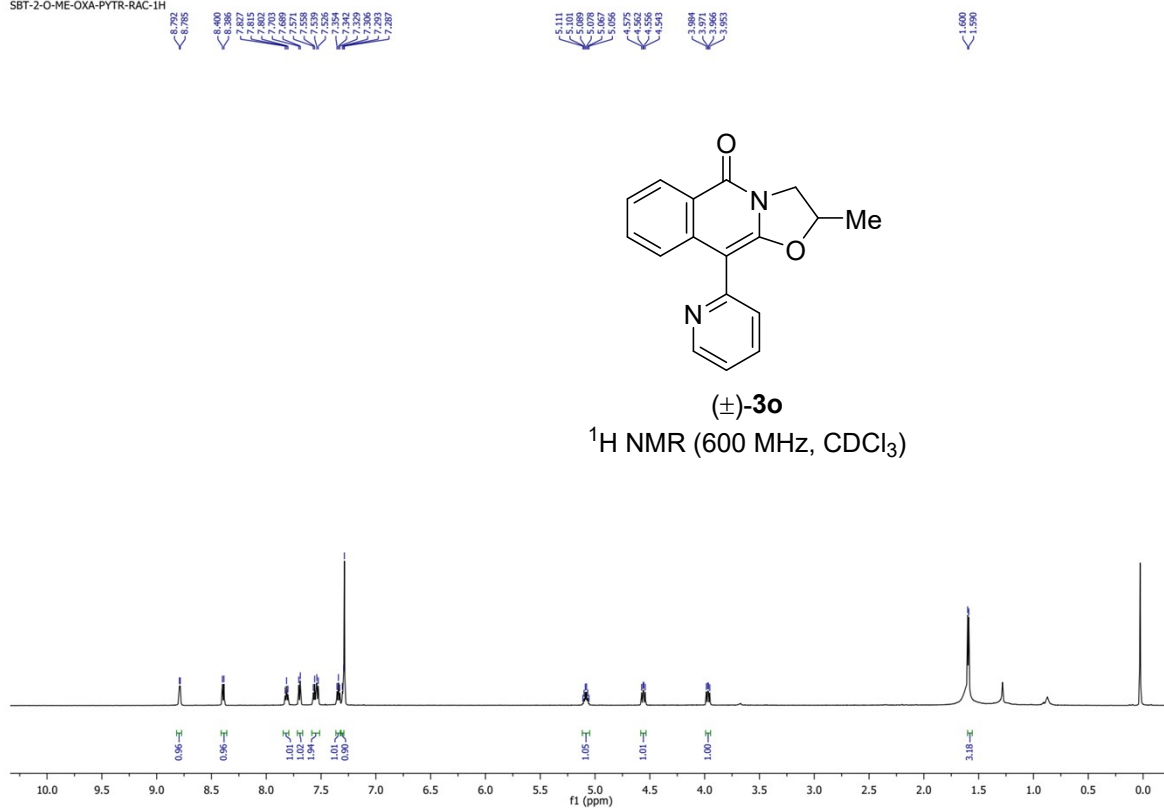

SBT-2-O-ME-OXA-PYTR-RAC-13C

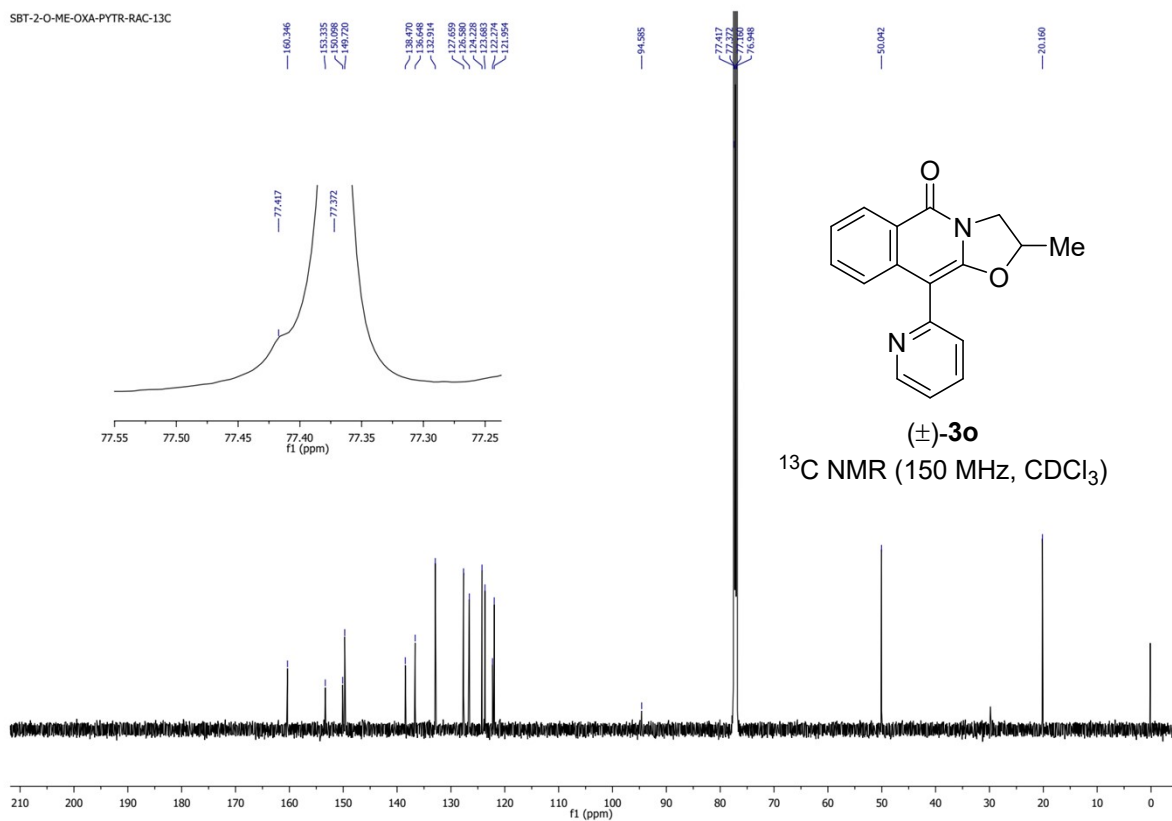

SBT-OXAZINE-PYTR-P2-1H

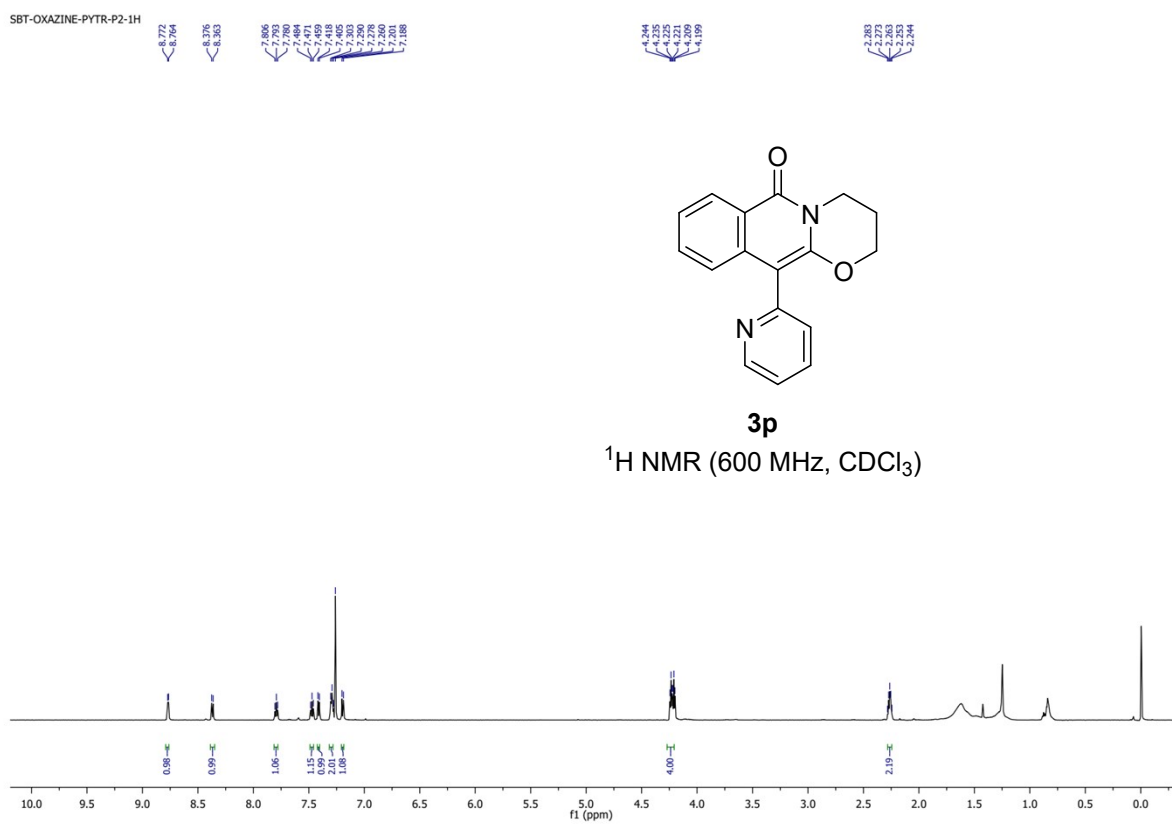

SBT-OXAZINE-PYTR-P2-13C

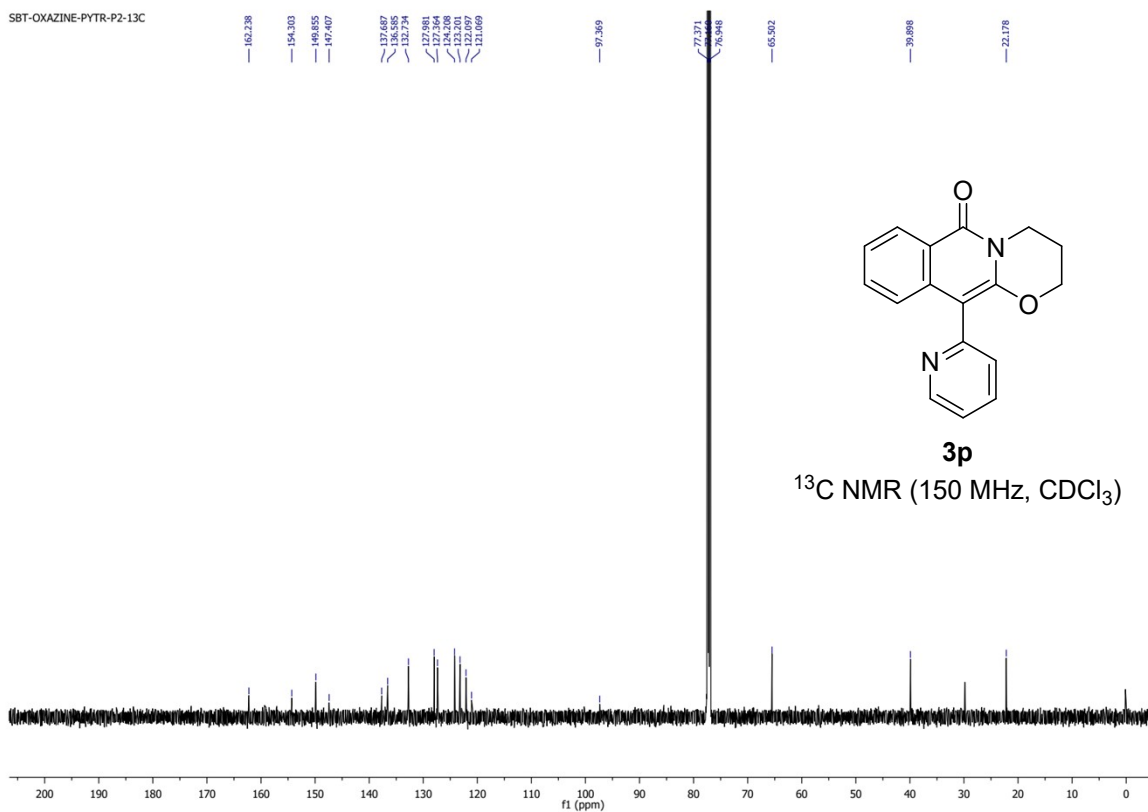

SBT-DAPO-OXA-PYTR-1H

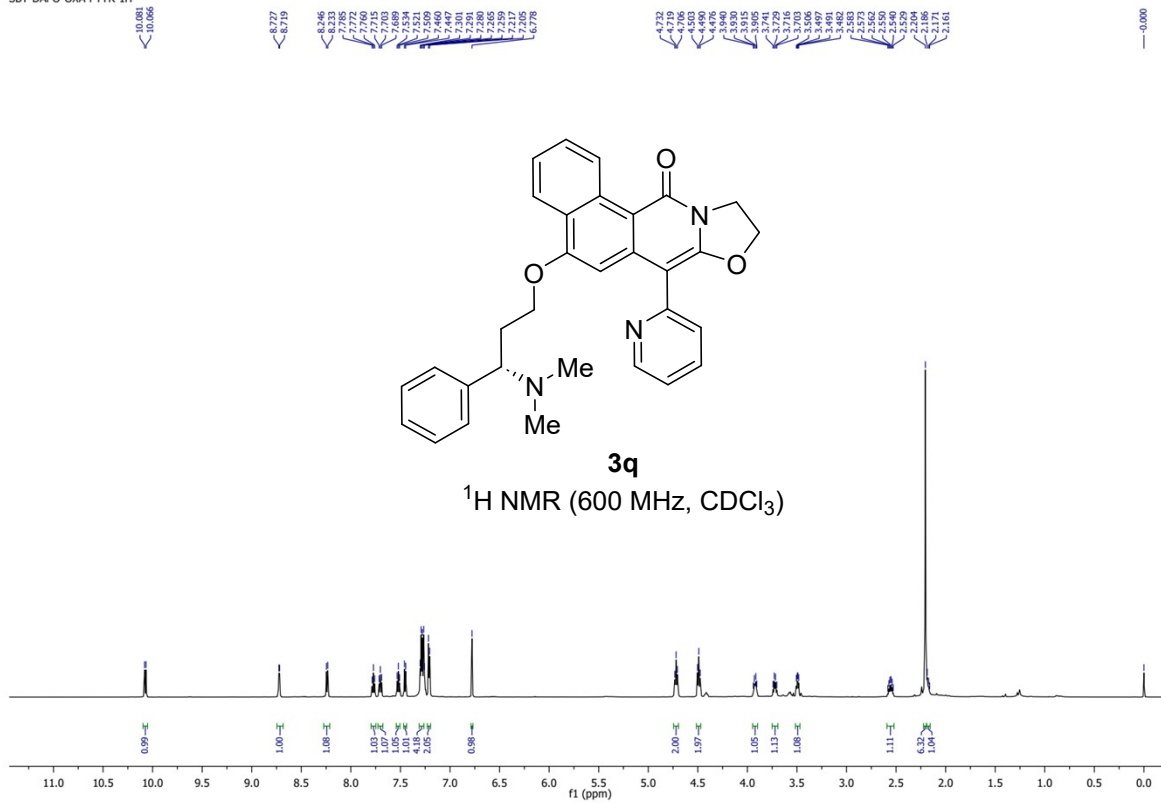

SBT-DAPO-OXA-PYTR-13C

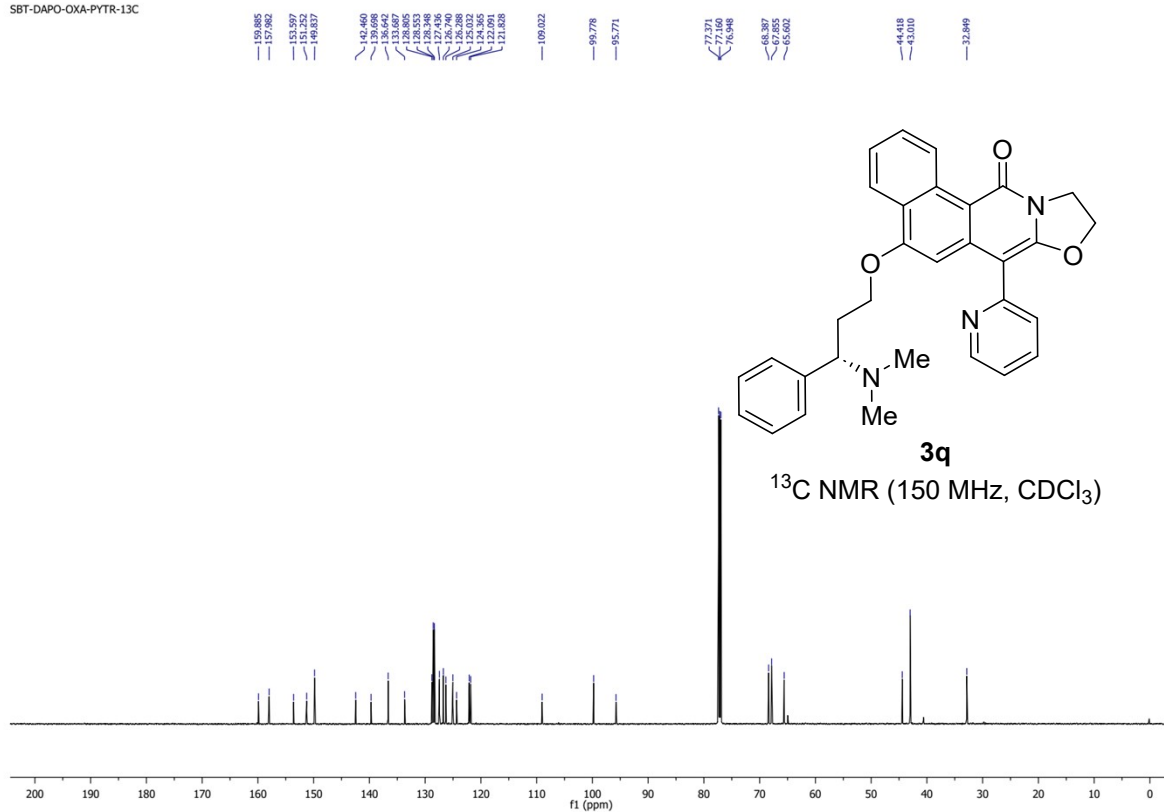

SBT-VtE-OXA-PYTR-1H

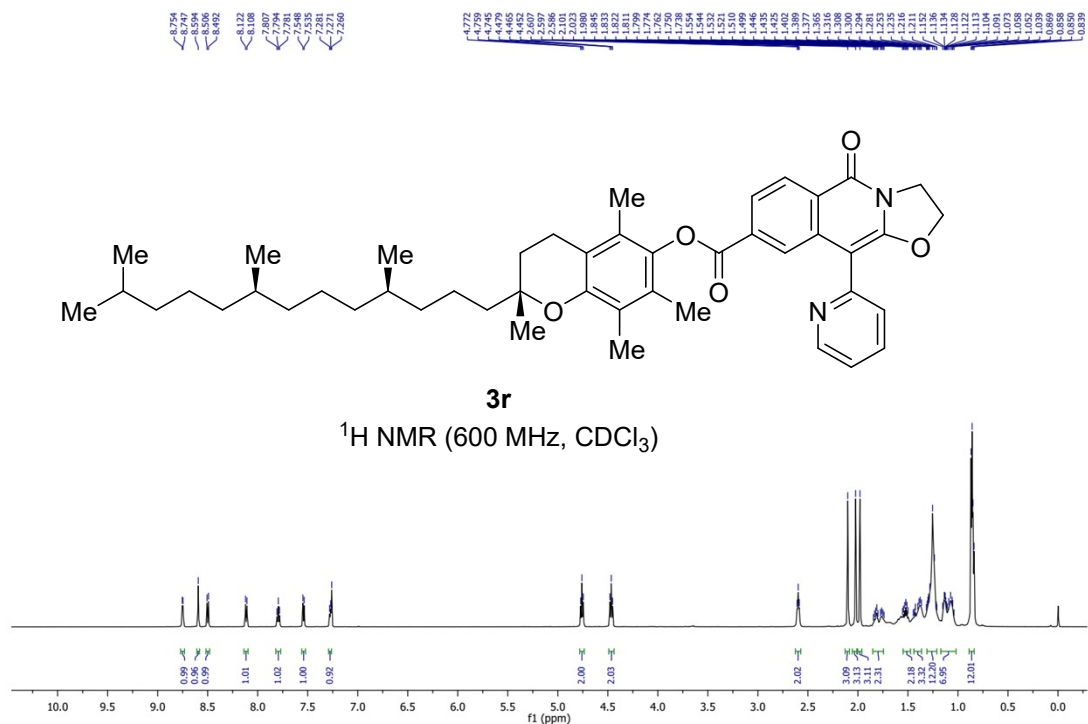



SBT-VIE-OXA-PYTR-13C

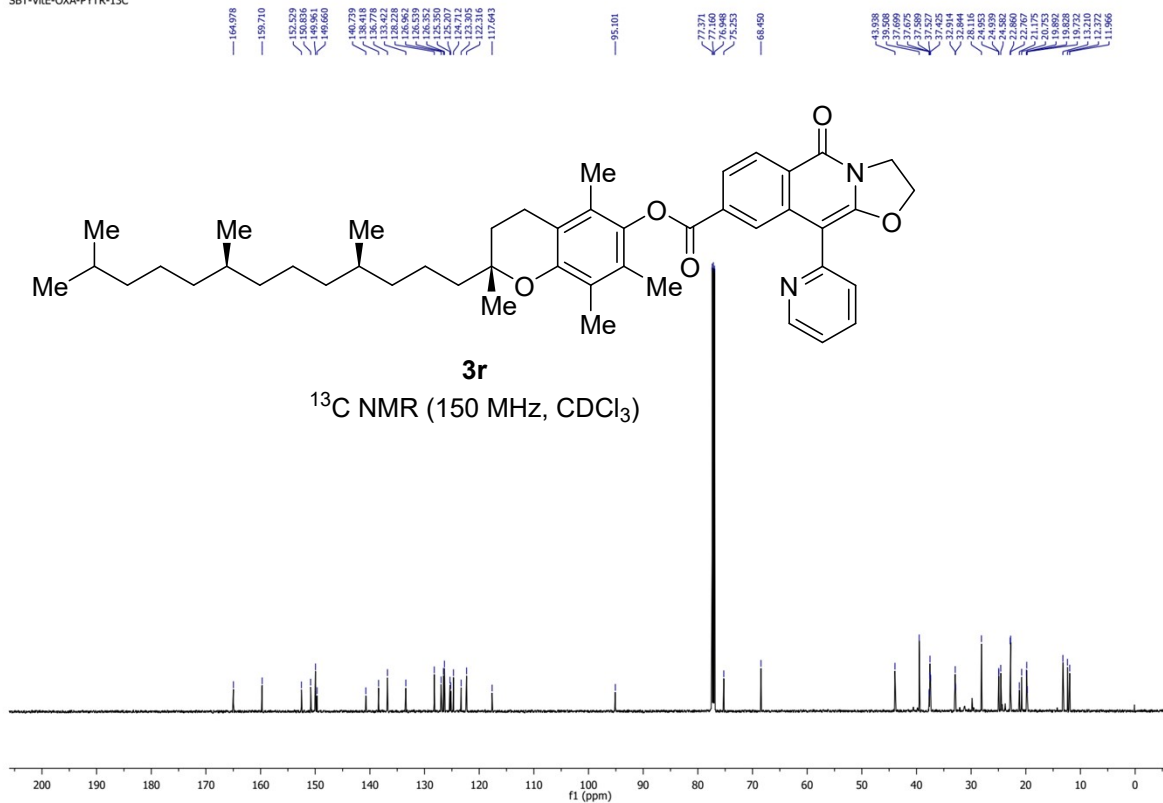

SBT-4CHOL-OXA-PYTR-1H

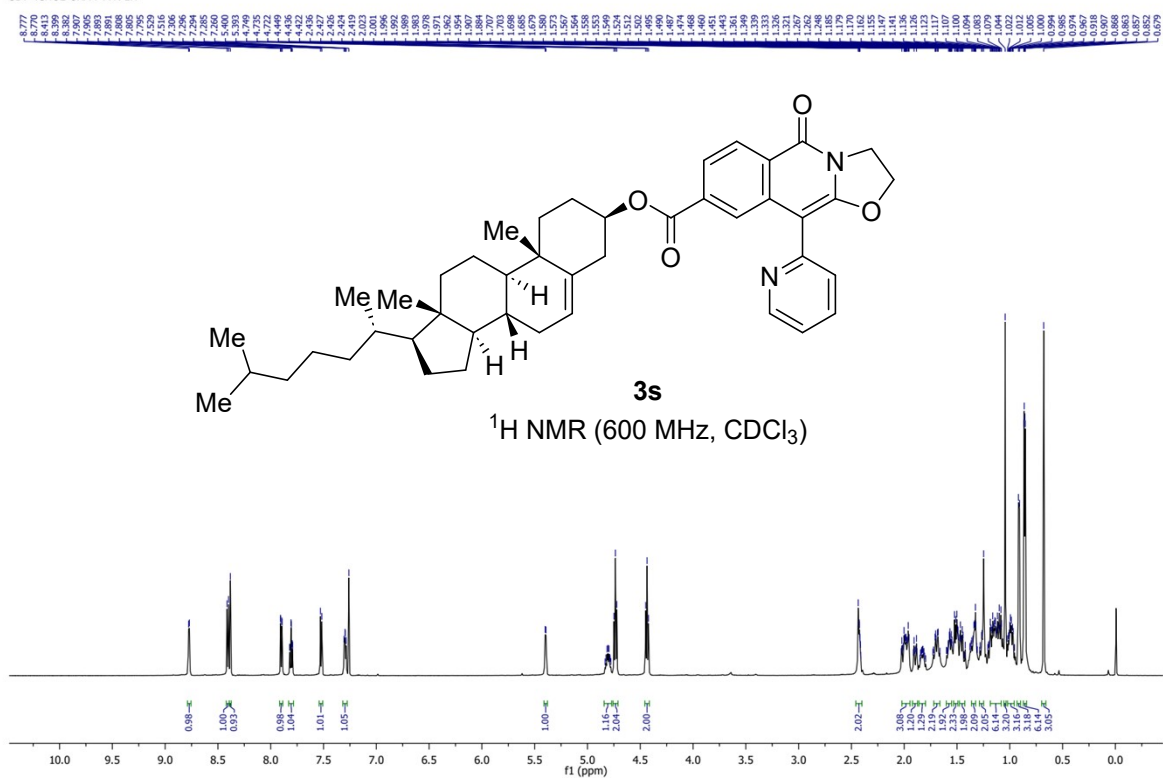



SBT-4BOR-OXA-PYTR-13C

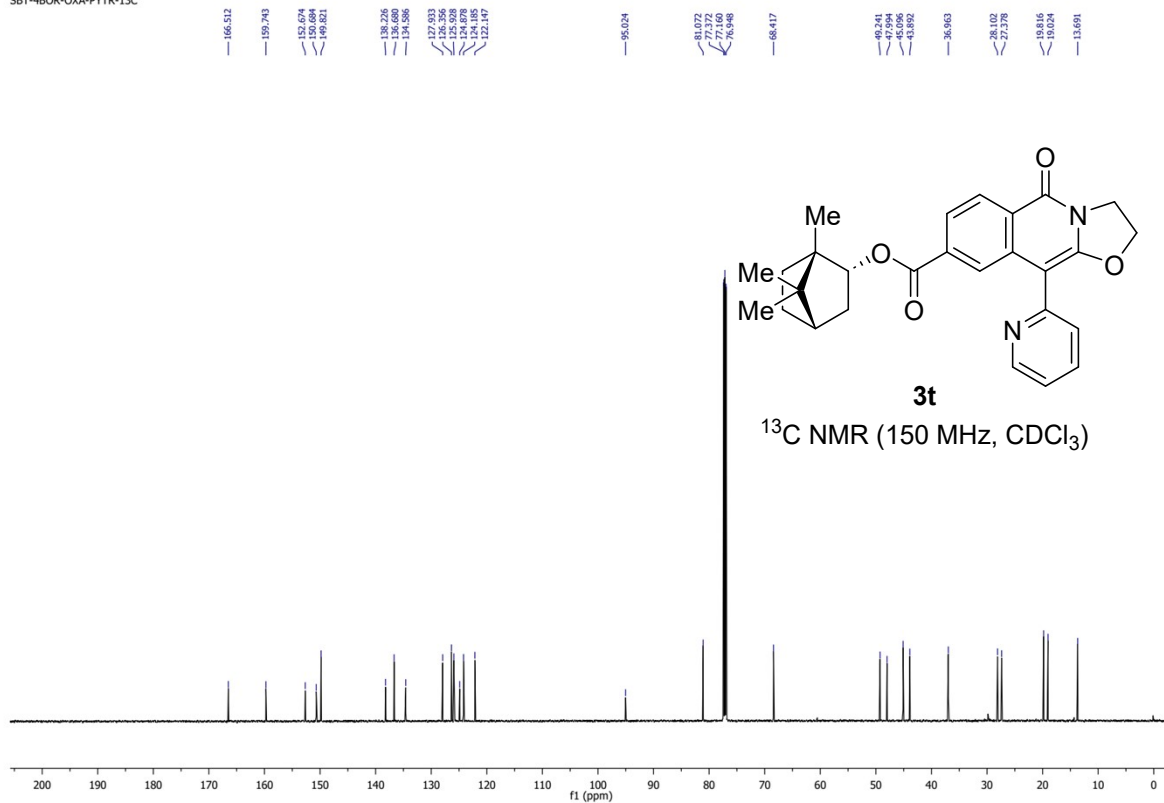

SBT-OXA-4Br-PYTR-1H

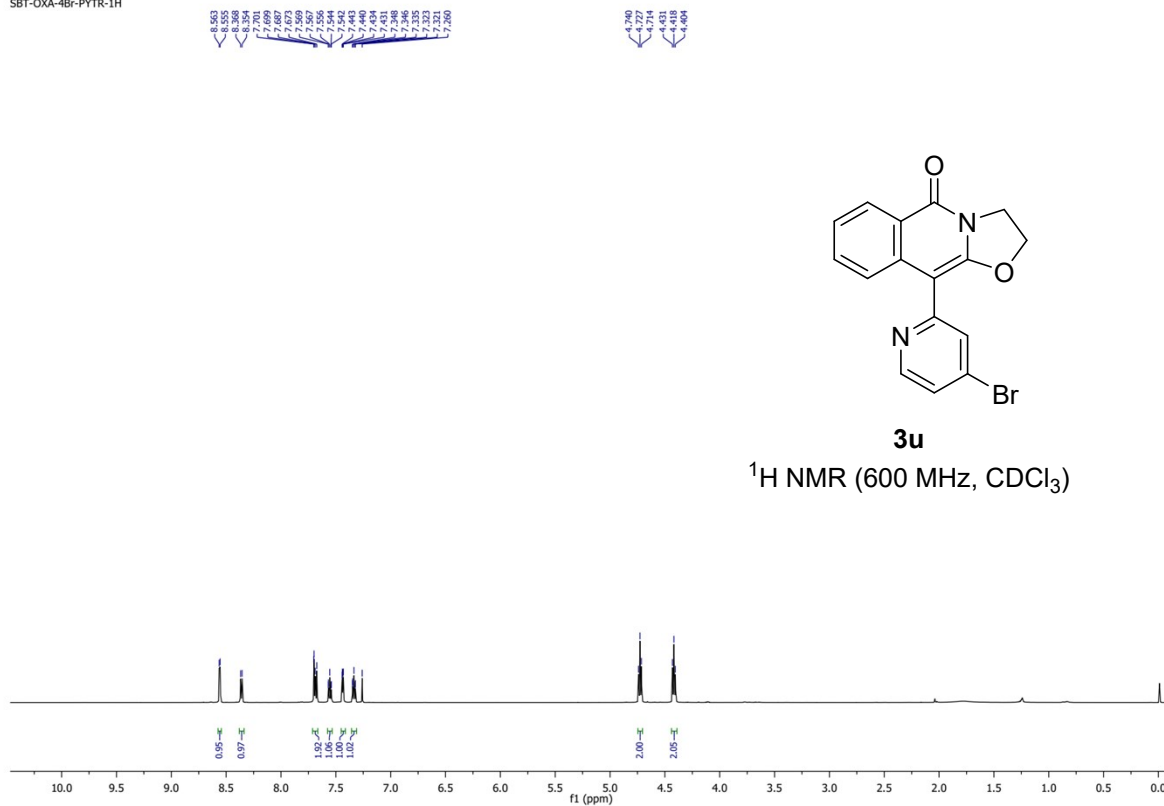

SBT-OXA-4Br-PYTR-13C

160.201  
154.606  
150.597  
150.281  
137.802  
133.141  
133.120  
129.564  
129.561  
125.204  
124.554  
122.297

99.652

77.322  
76.948

68.417

43.812

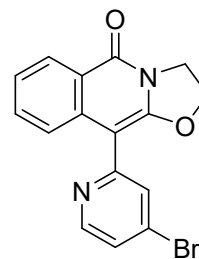

**3u**

$^{13}\text{C}$  NMR (150 MHz,  $\text{CDCl}_3$ )

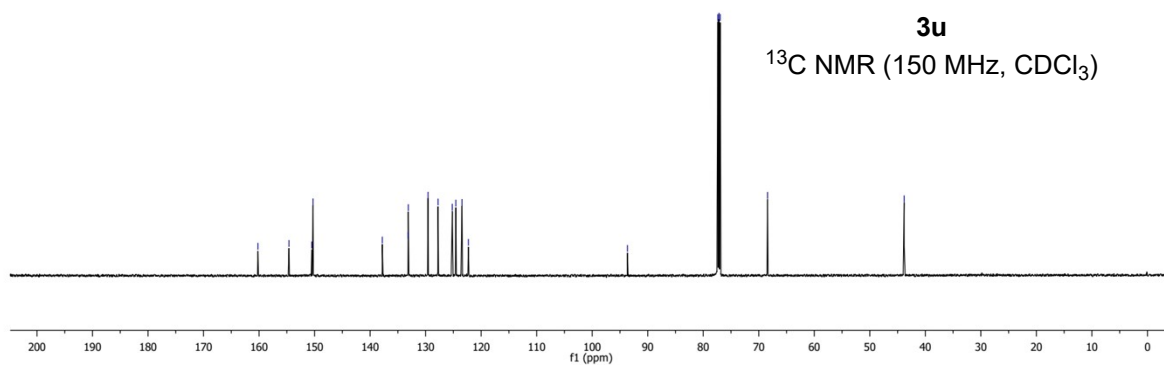

SBT-OXA-4PMP-PYTR-1H

8.755  
8.747  
8.396  
7.685  
7.673  
7.632  
7.557  
7.543  
7.531  
7.462  
7.460  
7.452  
7.390  
7.336  
7.315  
7.260  
7.204  
7.183

4.720  
4.693  
4.435  
4.409

3.864

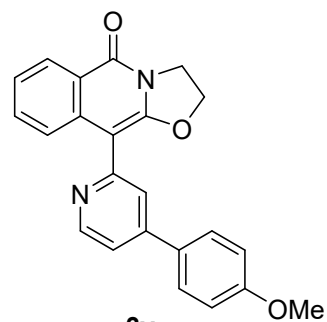

**3v**

$^1\text{H}$  NMR (600 MHz,  $\text{CDCl}_3$ )

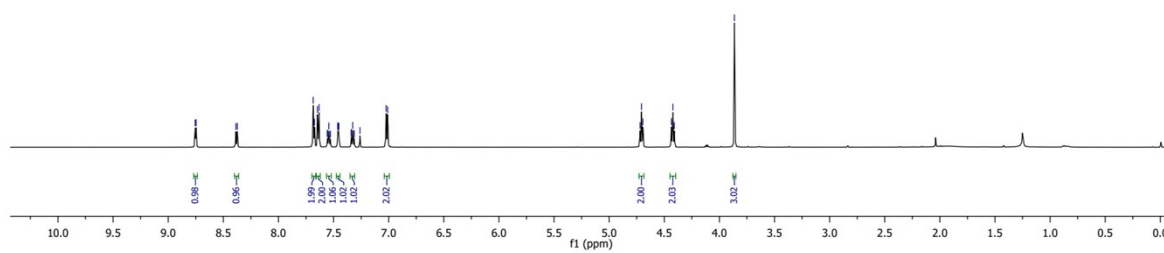

SBT-OXA-4PMP-PYTR-13C

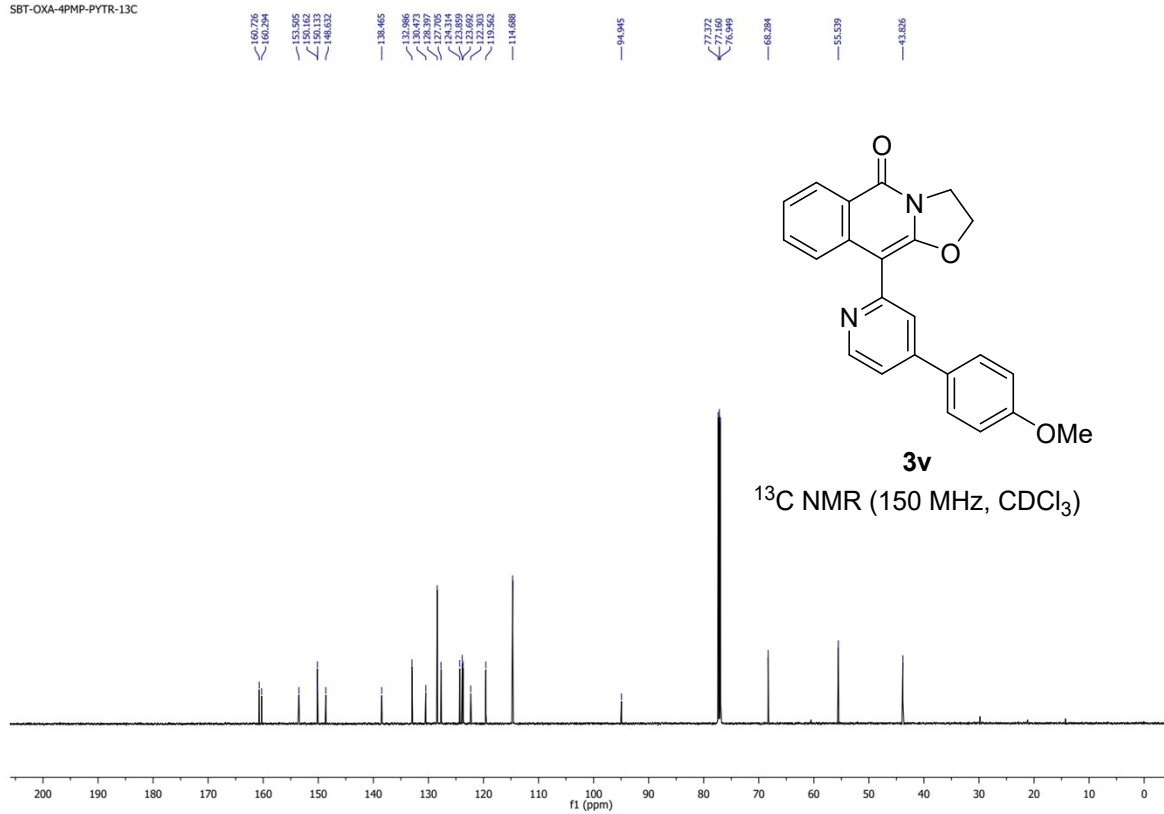

SBT-OXA-5Br-PYTR-1H

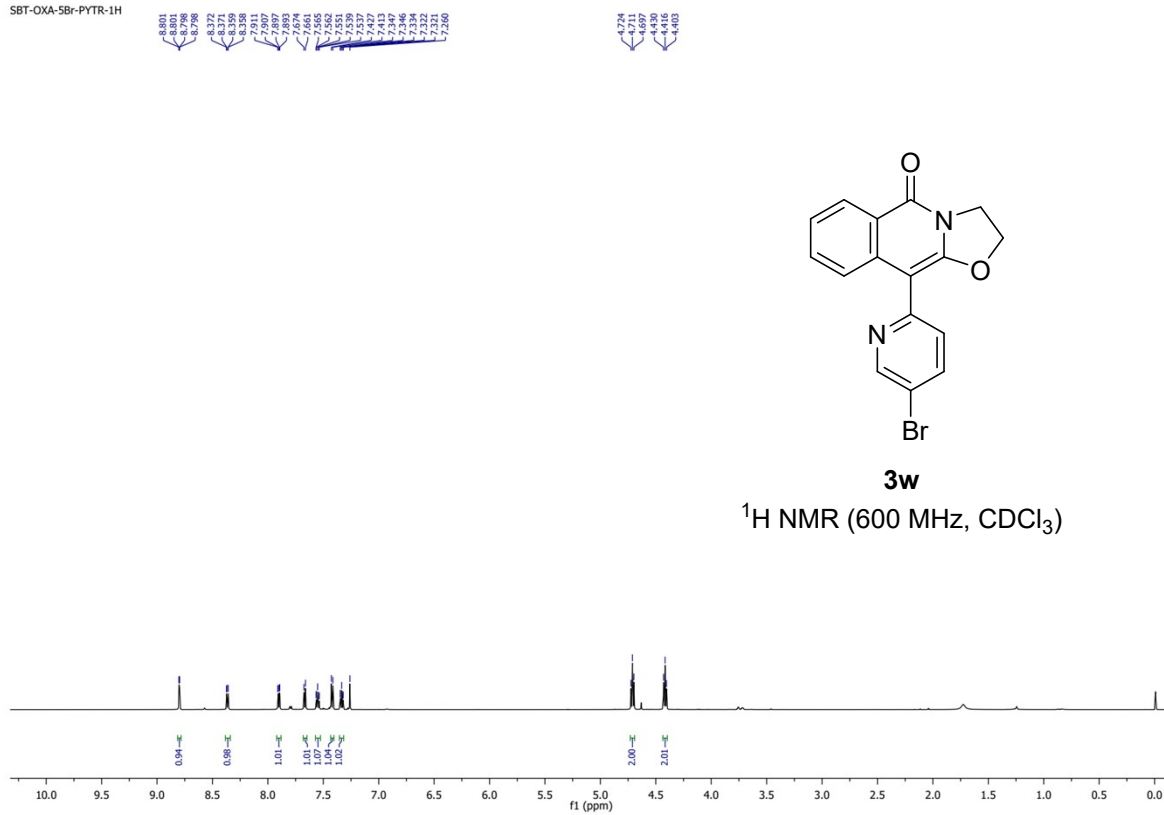

SBT-OXA-5-Br-PYTR-13C

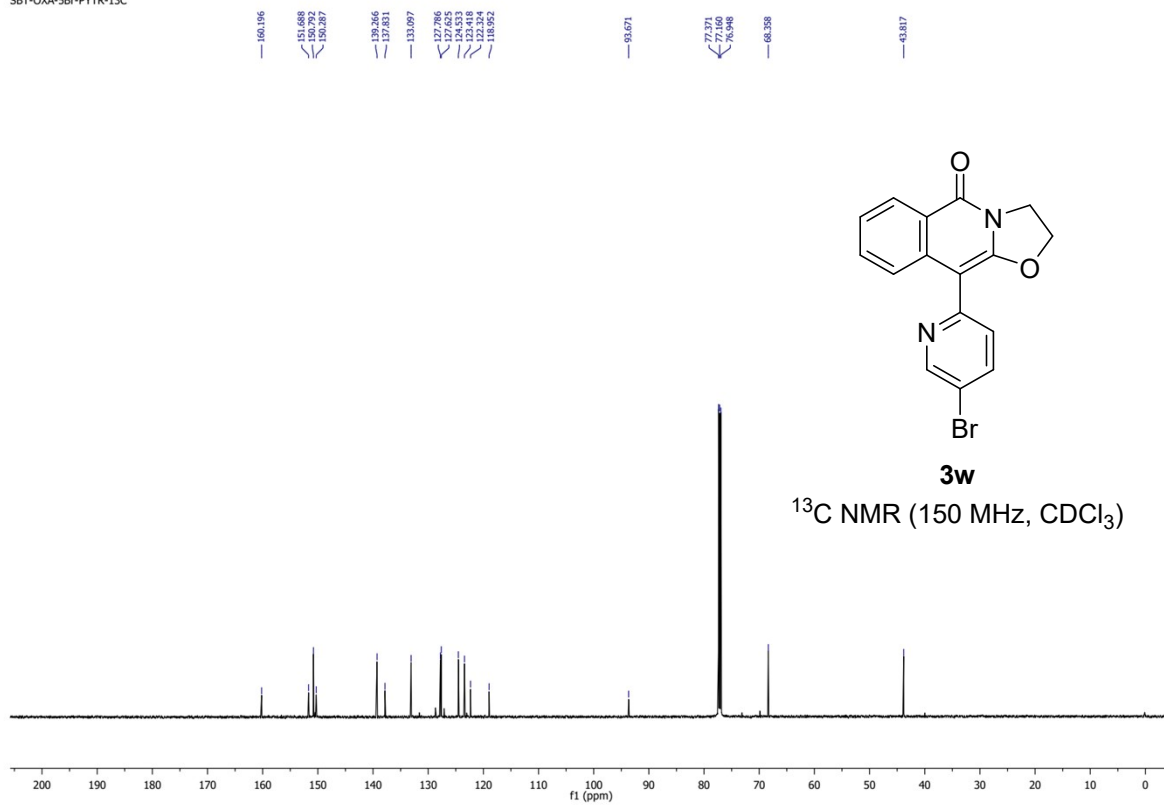

SBT-OXA-5-CF3-PYTR-1H

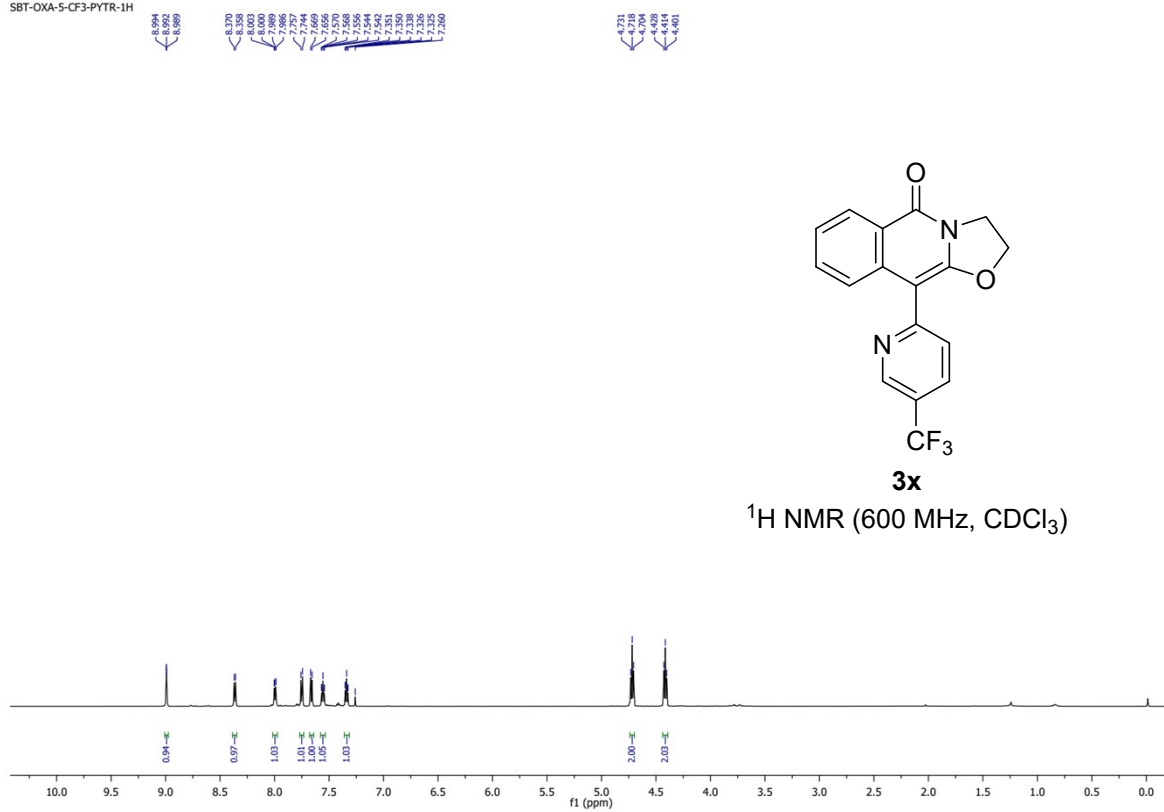

SBT-OXA-5-CF3-PYTR-13C

160.149  
157.036  
150.859  
146.433  
146.400  
146.354  
137.595  
133.667  
133.657  
133.625  
133.604  
127.774  
125.971  
124.528  
124.463  
124.400  
123.401  
122.310

83.719

77.372  
77.160  
76.948

68.499

43.795

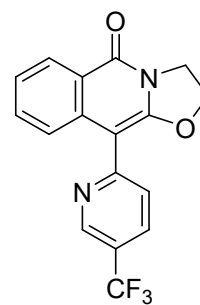

**3x**

<sup>13</sup>C NMR (150 MHz, CDCl<sub>3</sub>)

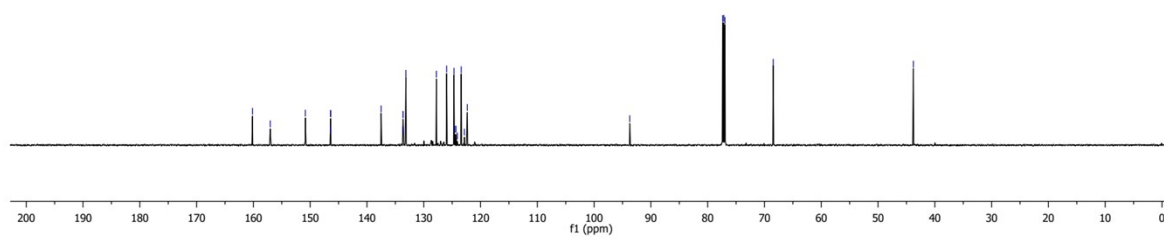

SBT-OXA-5-CF3-PYTR-19F

-62.764

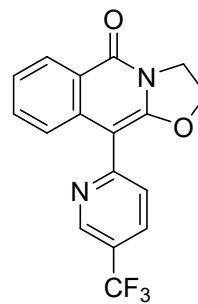

**3x**

<sup>19</sup>F NMR (565 MHz, CDCl<sub>3</sub>)

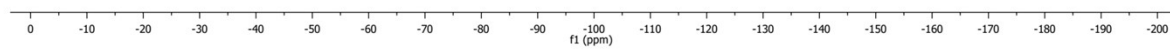

SBT-OXA-5-3THENYL-PYTR-1H

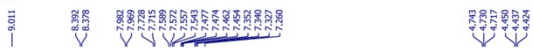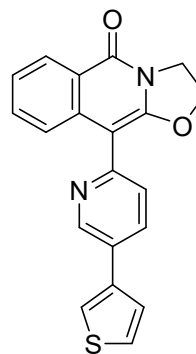

**3y**

<sup>1</sup>H NMR (600 MHz, CDCl<sub>3</sub>)

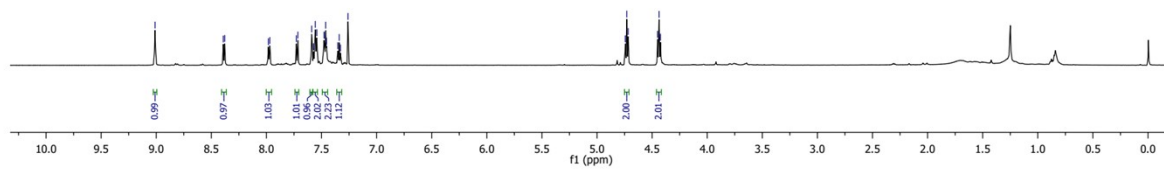

SBT-OXA-5-3THENYL-PYTR-13C

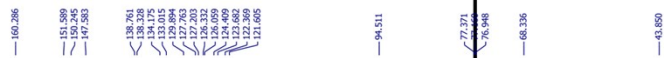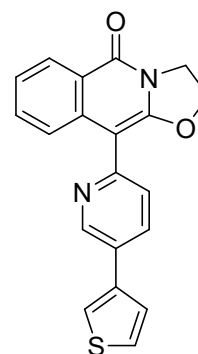

**3y**

<sup>13</sup>C NMR (150 MHz, CDCl<sub>3</sub>)

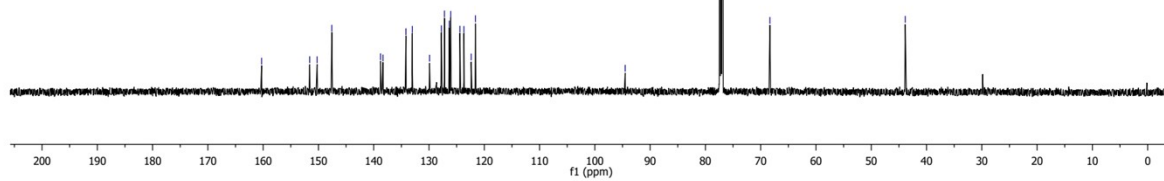





SBT-OXA-5-3PhCF3-PYTR-19F

—6.654

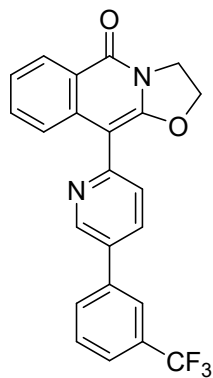

**3z**

<sup>19</sup>F NMR (565 MHz, CDCl<sub>3</sub>)

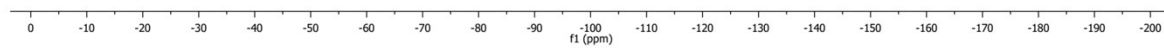

SBT-OXA-PYRAZINE-PYTR-1H

8.903  
8.792  
8.503  
8.387  
8.373

7.735  
7.582  
7.570  
7.368  
7.355  
7.260

4.796  
4.727  
4.652  
4.426

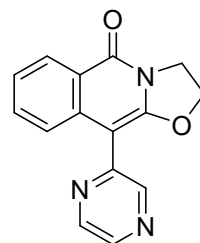

**3aa**

<sup>1</sup>H NMR (600 MHz, CDCl<sub>3</sub>)

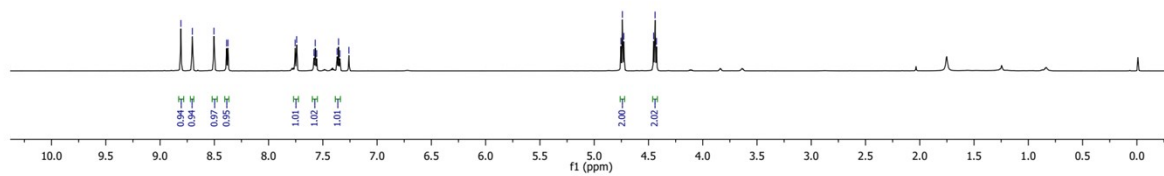

SBT-OXA-PYRAZINE-PYTR-13C

160.208  
151.028  
149.602  
147.433  
146.385  
145.237  
137.568  
133.236  
127.905  
124.765  
123.126  
122.459

91.304

77.727  
77.160  
76.549

68.489

43.868

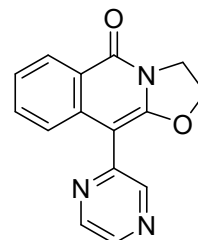

**3aa**

$^{13}\text{C}$  NMR (150 MHz,  $\text{CDCl}_3$ )

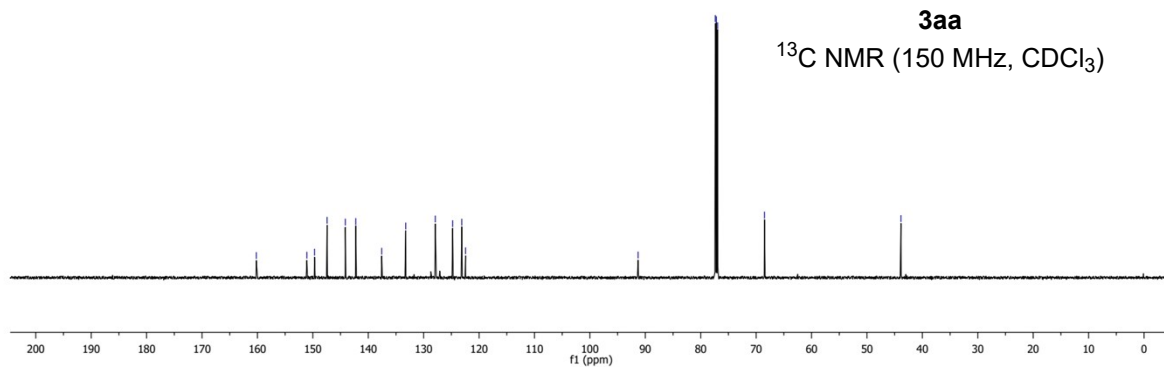

SBT-OXA-QN-PYTR-P2-1H

8.407  
8.375  
8.239  
8.155  
8.151  
7.981  
7.979  
7.753  
7.614  
7.628  
7.593  
7.568  
7.540  
7.540  
7.527  
7.396  
7.396  
7.334  
7.260

4.741  
4.727  
4.714  
4.446  
4.432

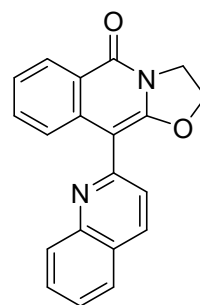

**3ab**

$^1\text{H}$  NMR (600 MHz,  $\text{CDCl}_3$ )

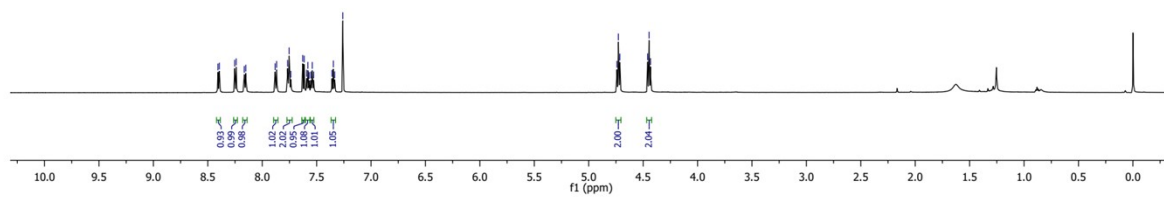

SBT-OXA-QN-PYTR-P2-13C

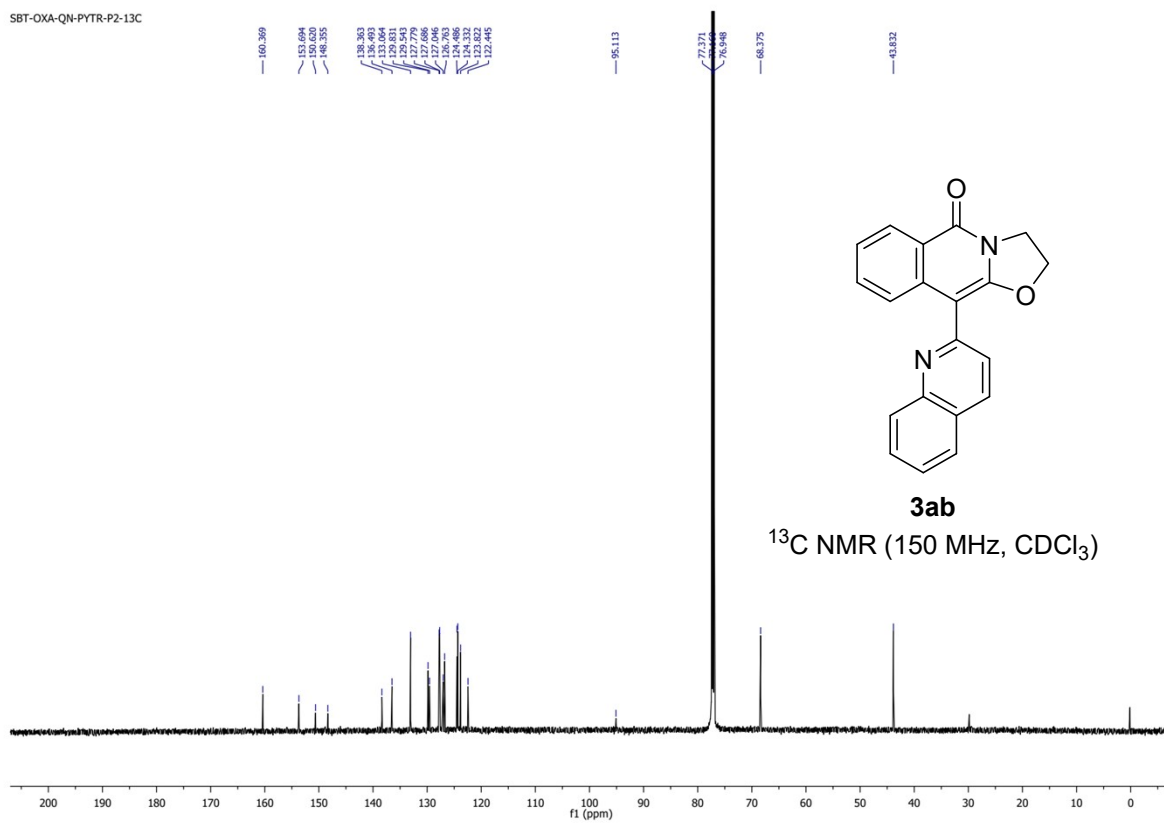

SBT-OXA-BENZOXA-PYTR-P2-1H

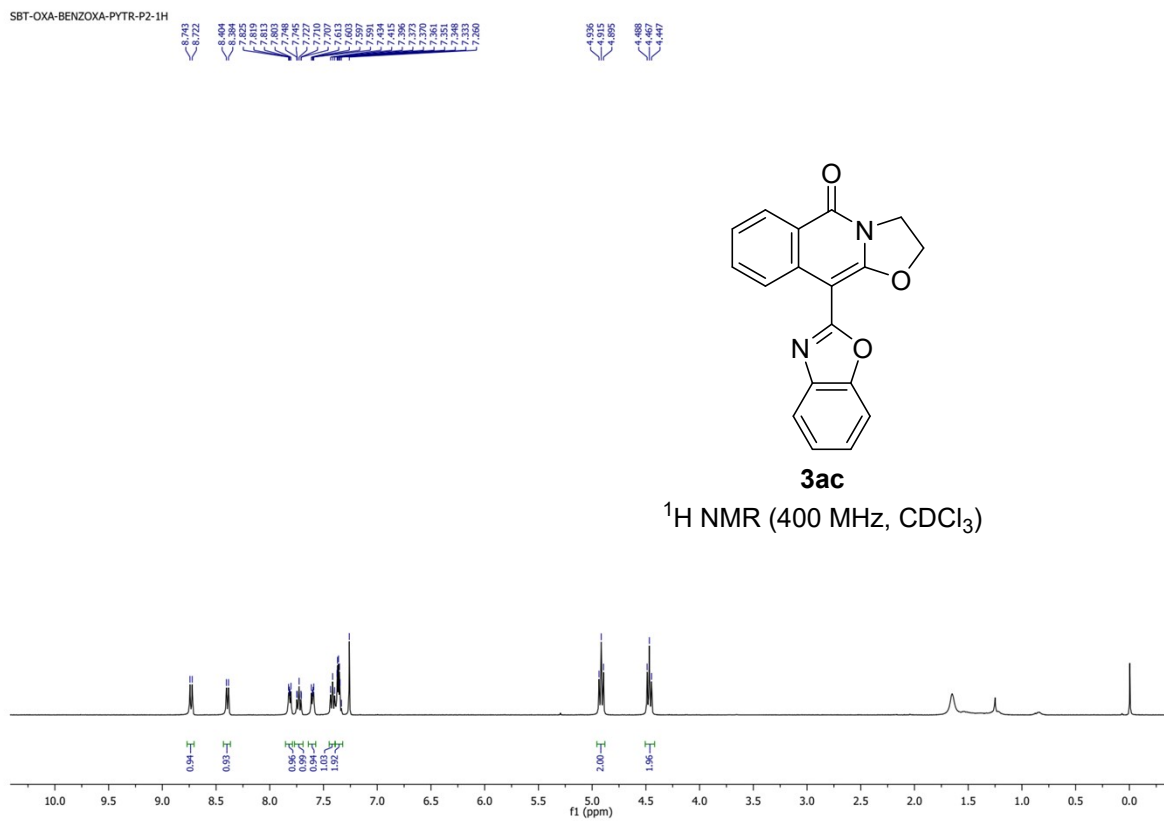

SBT-OXA-BENZOXA-PYTR-P2-13C

160.095  
159.527  
154.341  
149.973  
141.796  
135.079  
133.792  
127.796  
126.126  
124.893  
124.482  
121.992  
119.757  
110.419

83.646  
77.320  
77.160  
76.947  
69.113

43.764

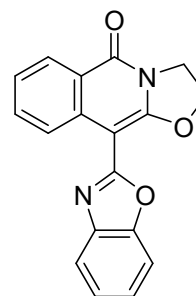

**3ac**

$^{13}\text{C}$  NMR (150 MHz,  $\text{CDCl}_3$ )

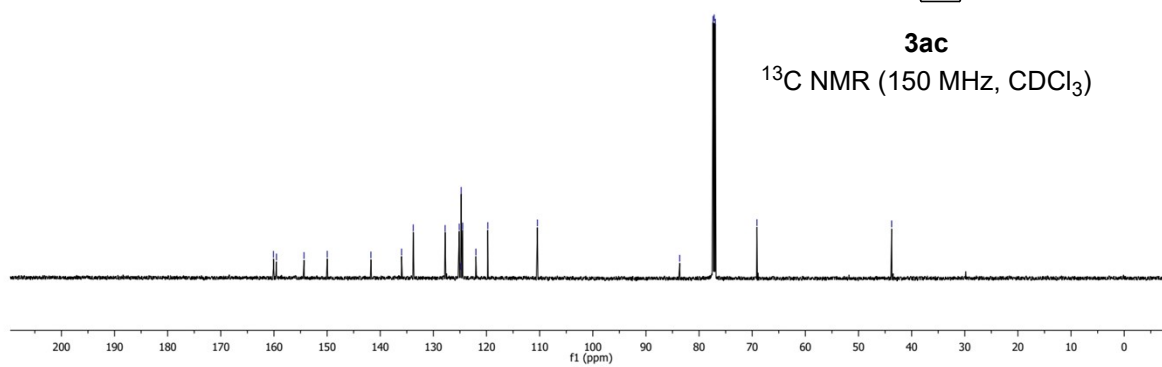

SBT-OXA-5-SESA-PYTR-1H

8.021  
8.017  
8.394  
7.917  
7.913  
7.900  
7.729  
7.577  
7.563  
7.550  
7.545  
7.342  
7.329  
7.138  
7.135  
7.125  
6.955  
6.941  
6.045

4.747  
4.721  
4.684  
4.627

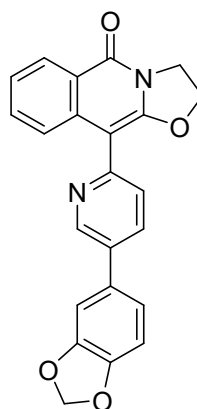

**3ad**

$^1\text{H}$  NMR (600 MHz,  $\text{CDCl}_3$ )

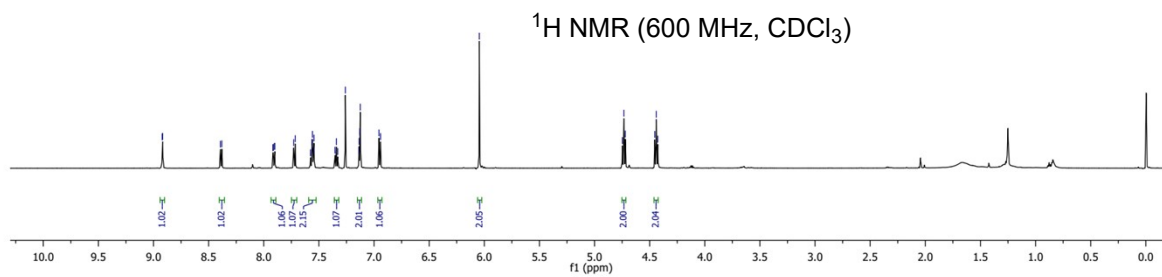

SBT-OXA-5-SESA-PYTR-13C

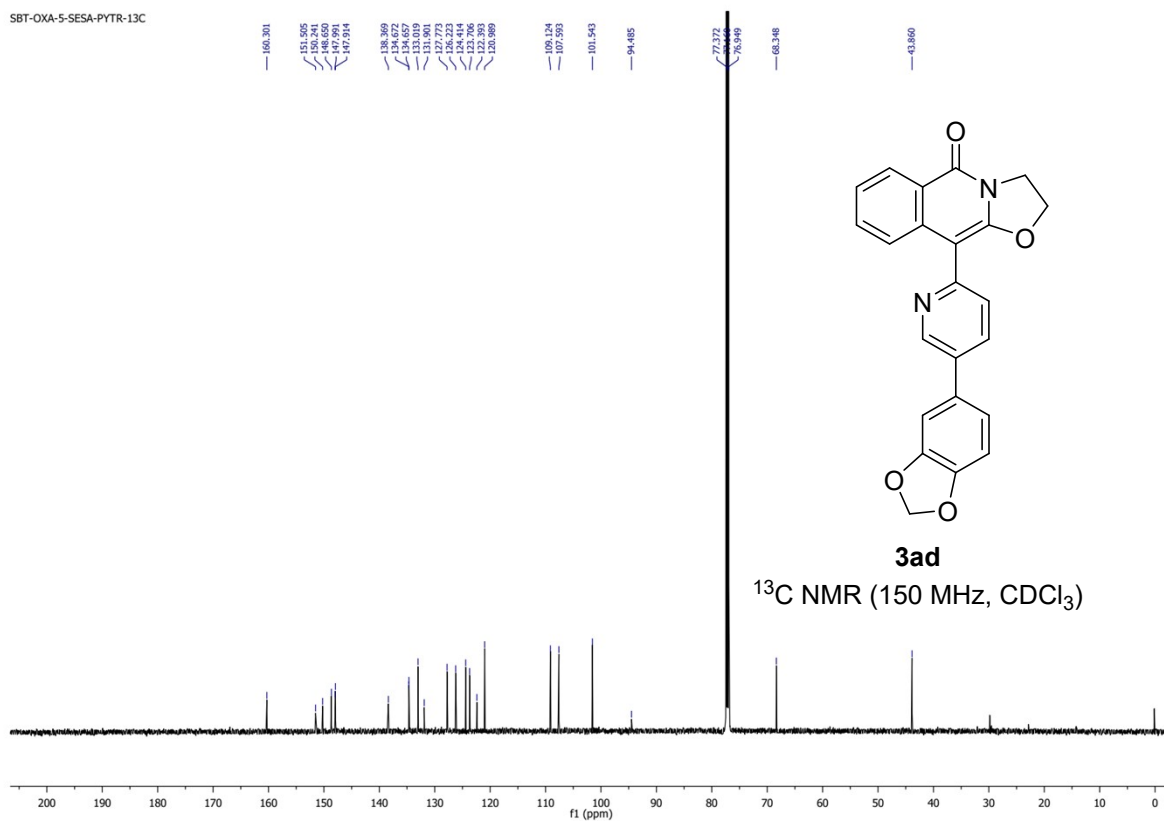

SBT-PY-OXA-PYTR-1H

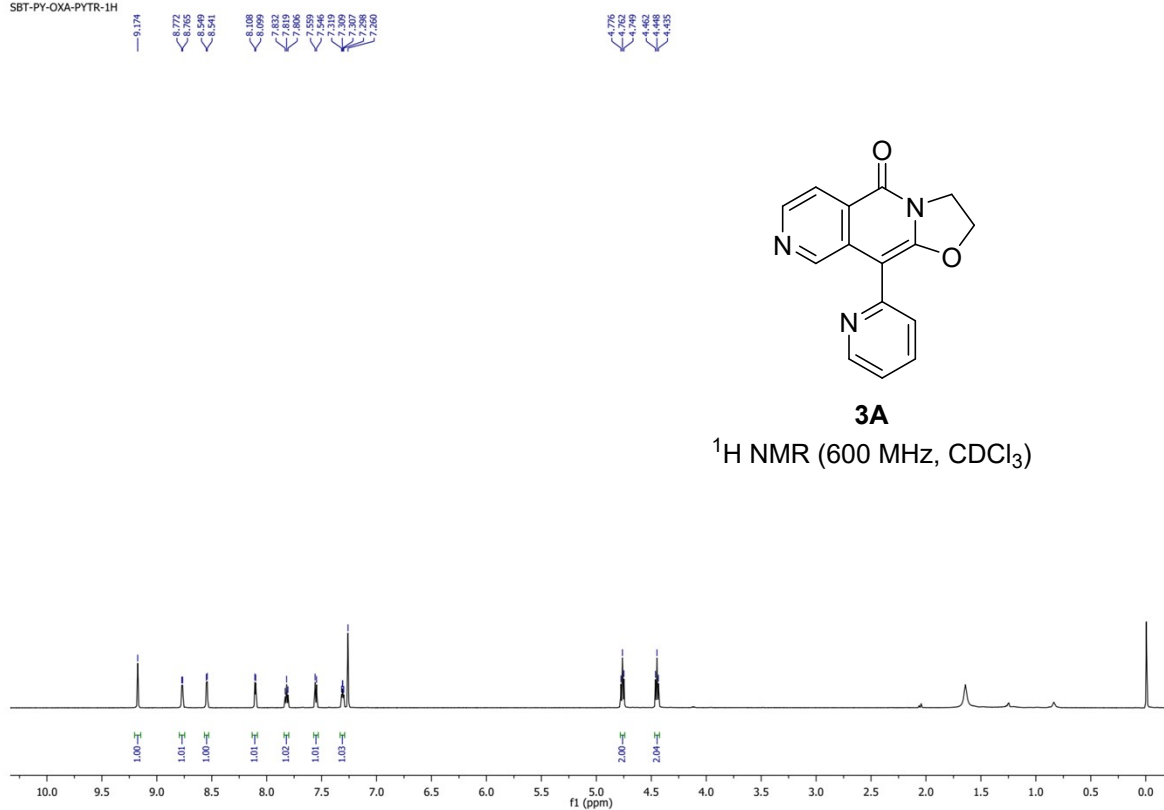

SBT-PY-OXA-PYTR-13C

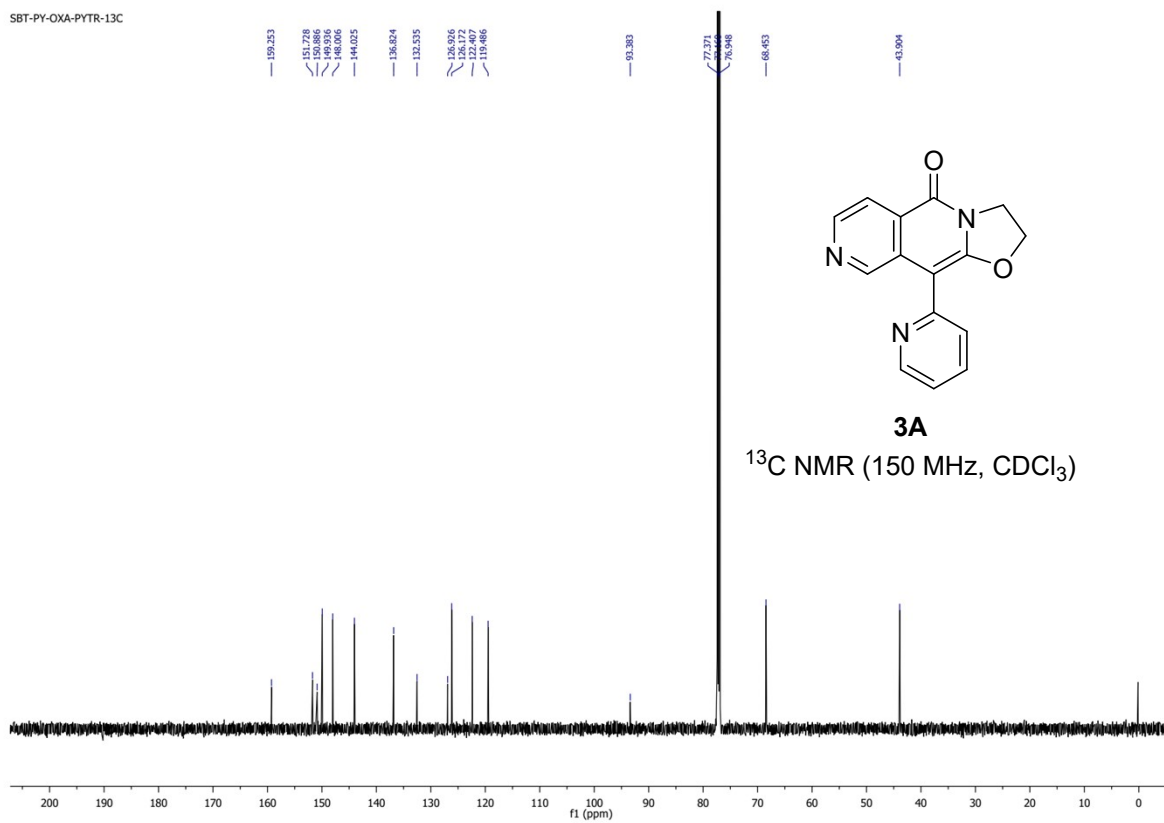

SBT-2THENYL-OXA-PYTR-1H

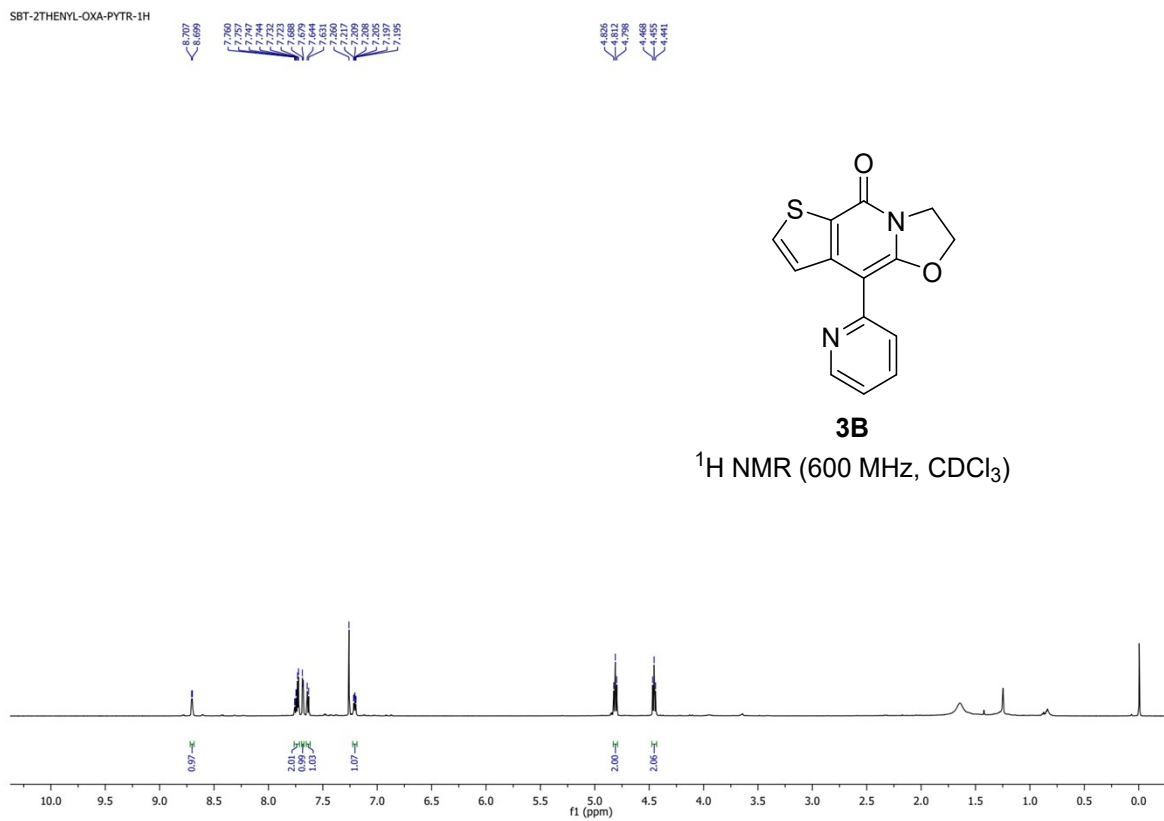

SBT-2THENYL-OXA-PYTR-13C

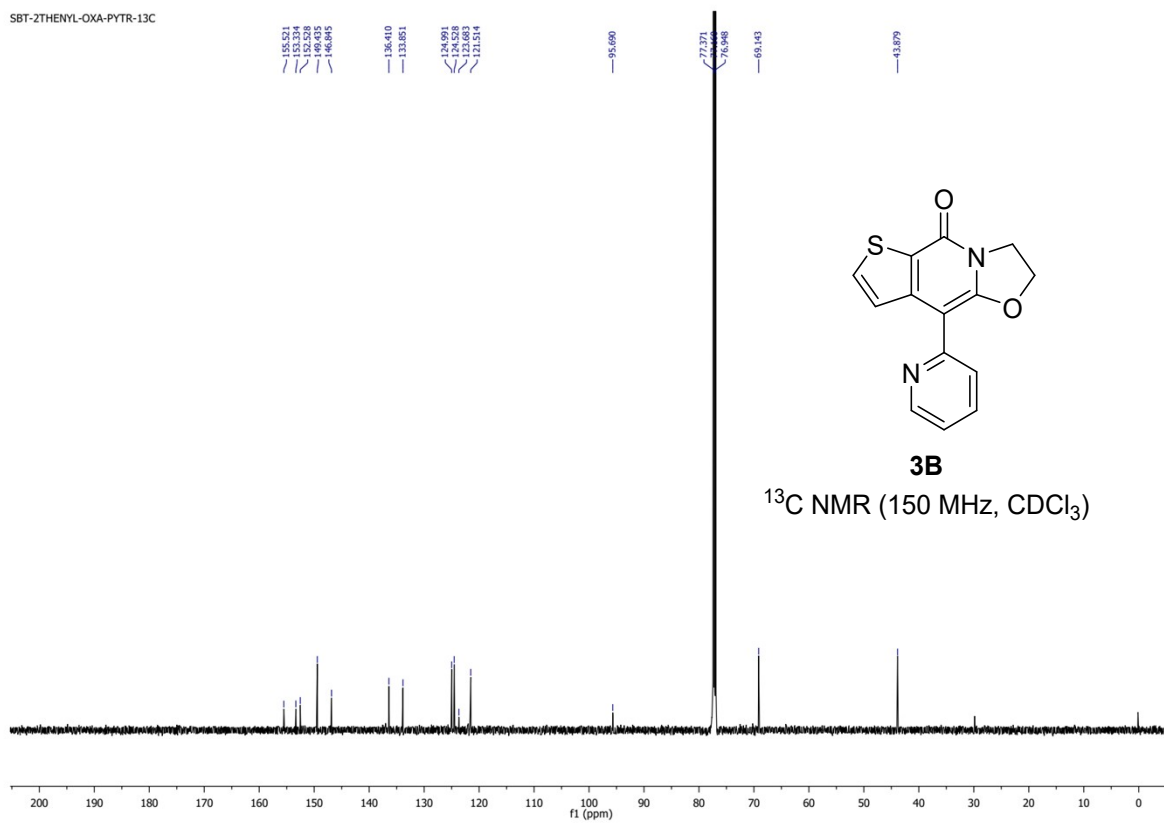

SBT-BENZOTHIO-OXA-PYTR-1H

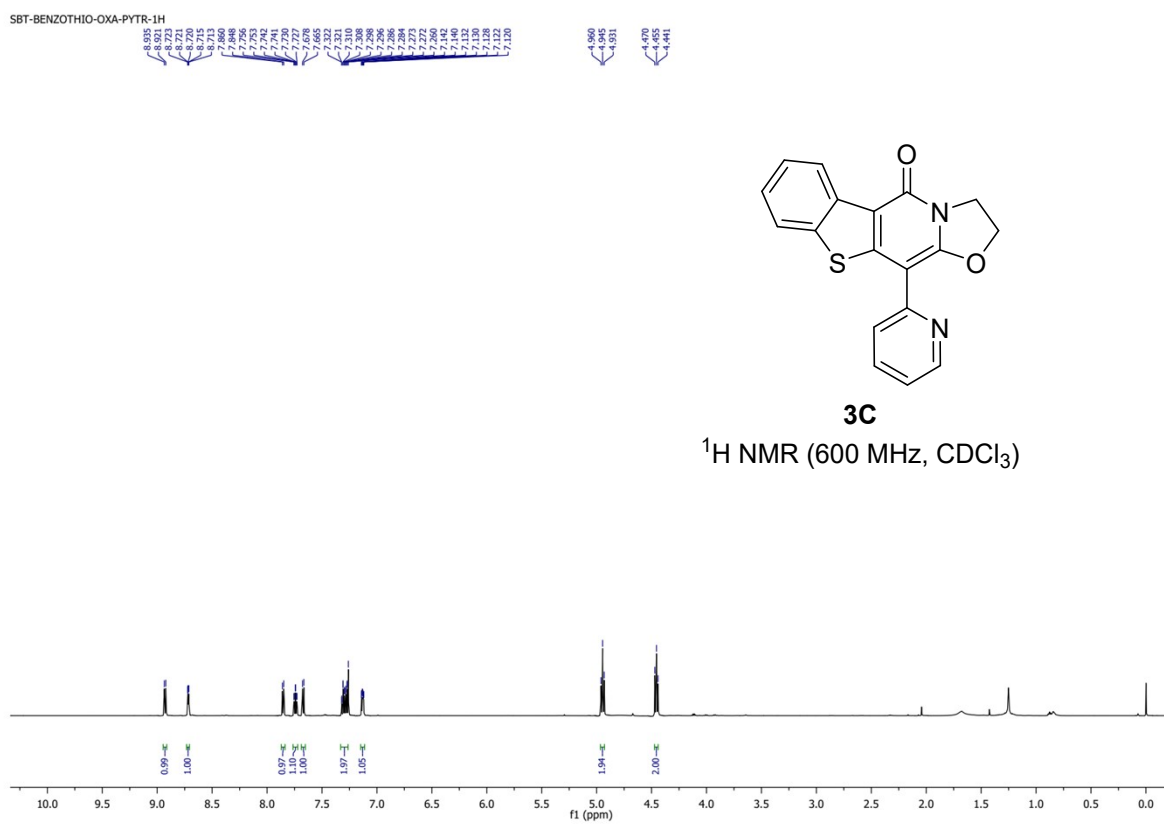



SBT-BENZOTHIO-OXA-PYTR-13C

155.088  
153.763  
151.711  
146.441  
140.524  
136.202  
131.866  
129.852  
128.500  
125.152  
122.819  
119.466  
121.601  
120.339  
109.659  
101.269

77.71  
77.169  
76.948  
70.172

41.300

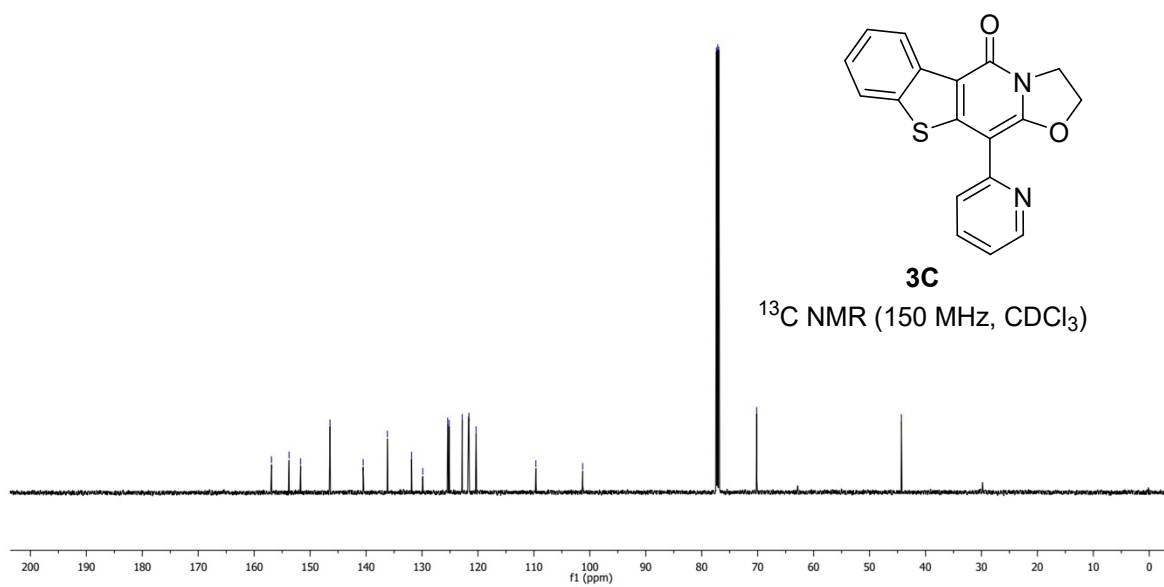

SBT-APP-Suzuki-1H

8.781  
8.773  
8.437  
8.437  
7.824  
7.821  
7.809  
7.799  
7.786  
7.783  
7.568  
7.562  
7.556  
7.548  
7.537  
7.524  
7.524  
7.469  
7.396  
7.358  
7.356  
7.346  
7.343  
7.334  
7.332  
7.292  
7.286  
7.282  
7.280  
7.272  
7.260  
4.717  
4.704  
4.434  
4.421

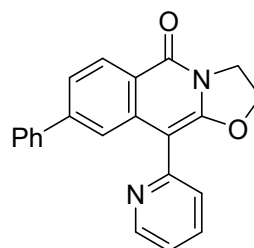

<sup>1</sup>H NMR (600 MHz, CDCl<sub>3</sub>)

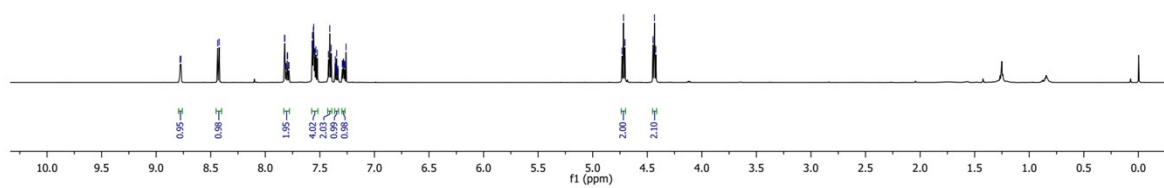

SBT-APP-Suzuki-13C

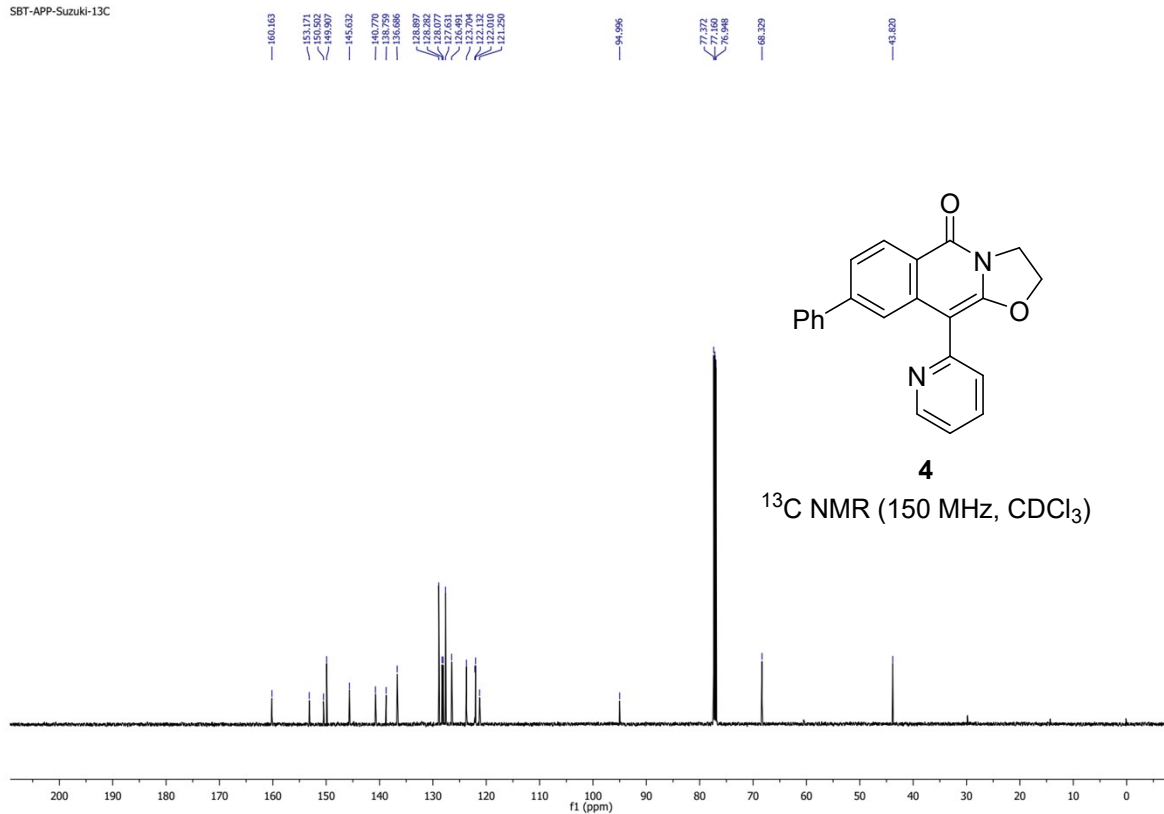

SBT-APP-Sonogashira-1H

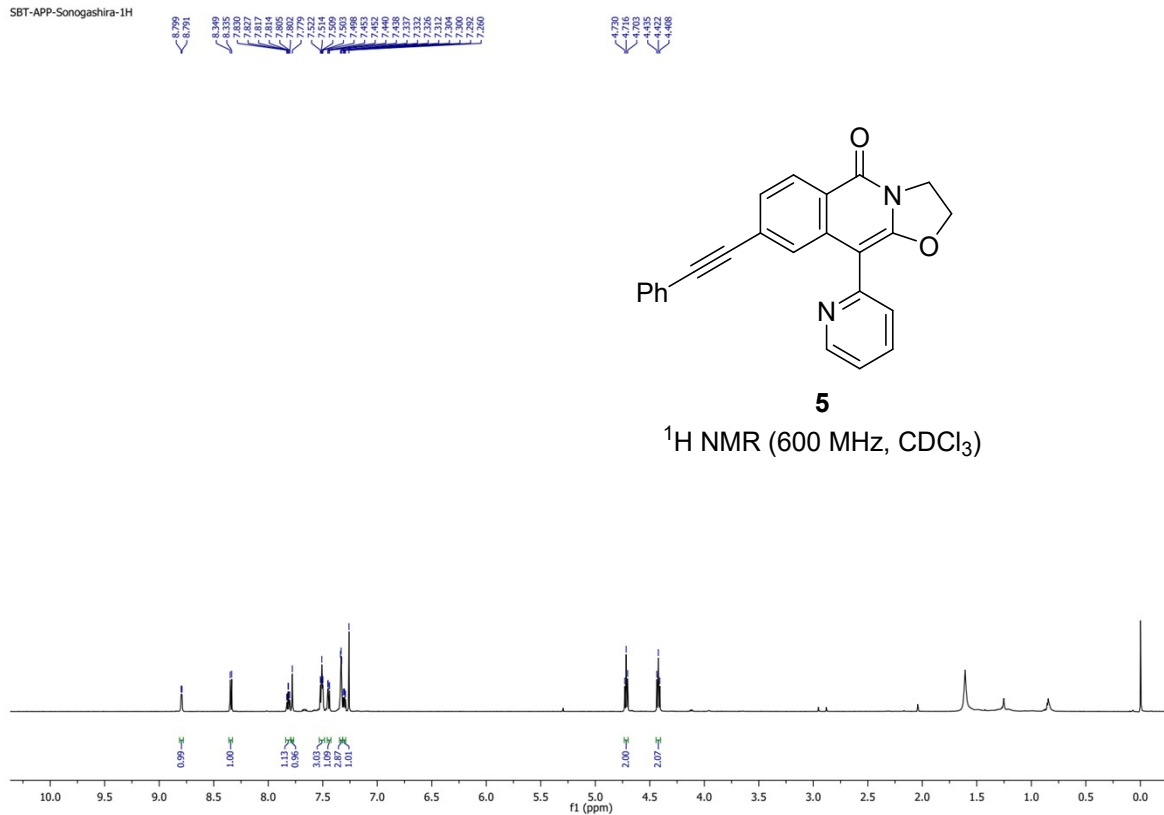

SBT-APP-Sonogashira-13C

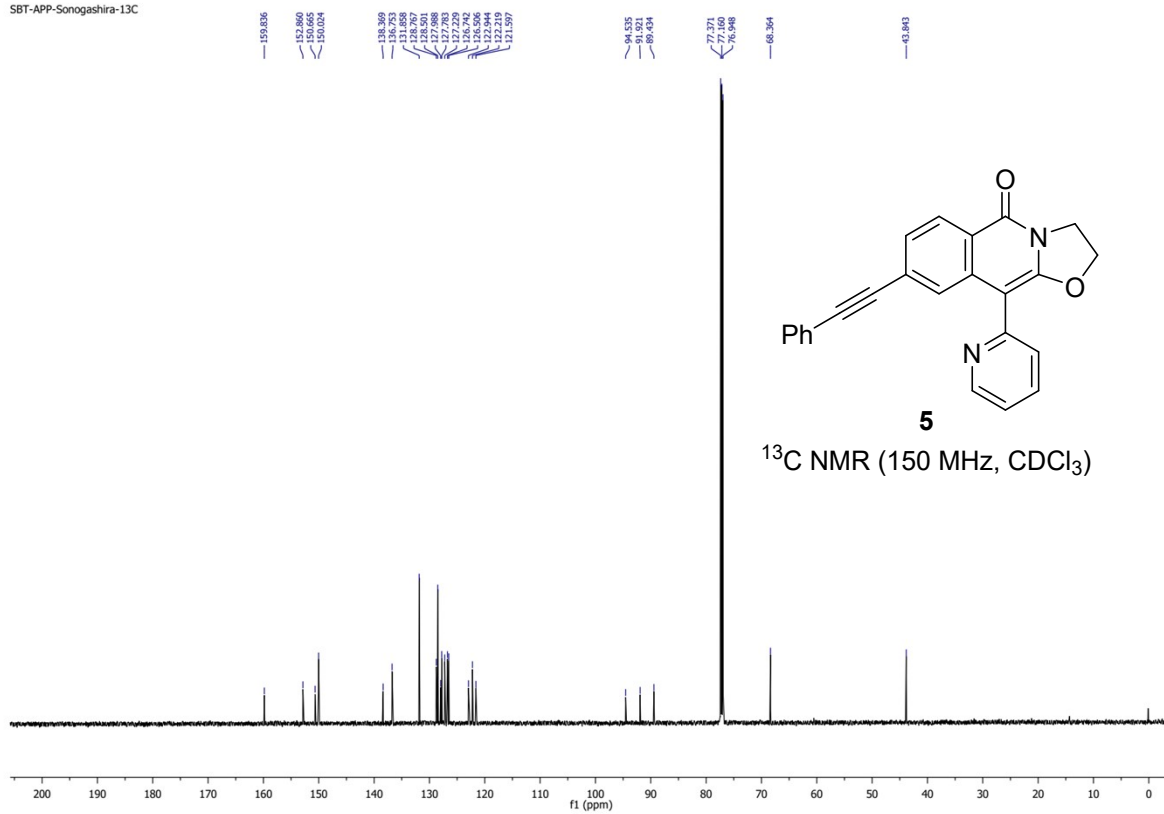

SBT-APP-Phosphorylation-1H

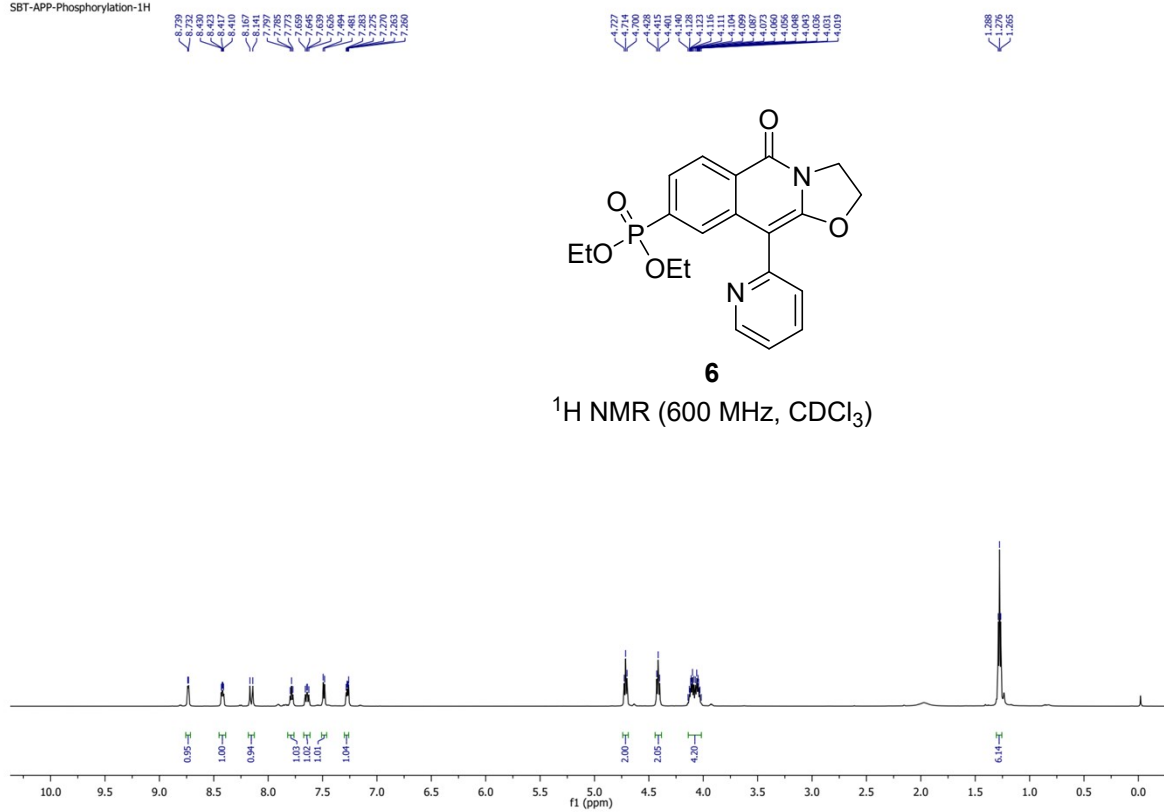

SBT-APP-Phosphorylation-13C

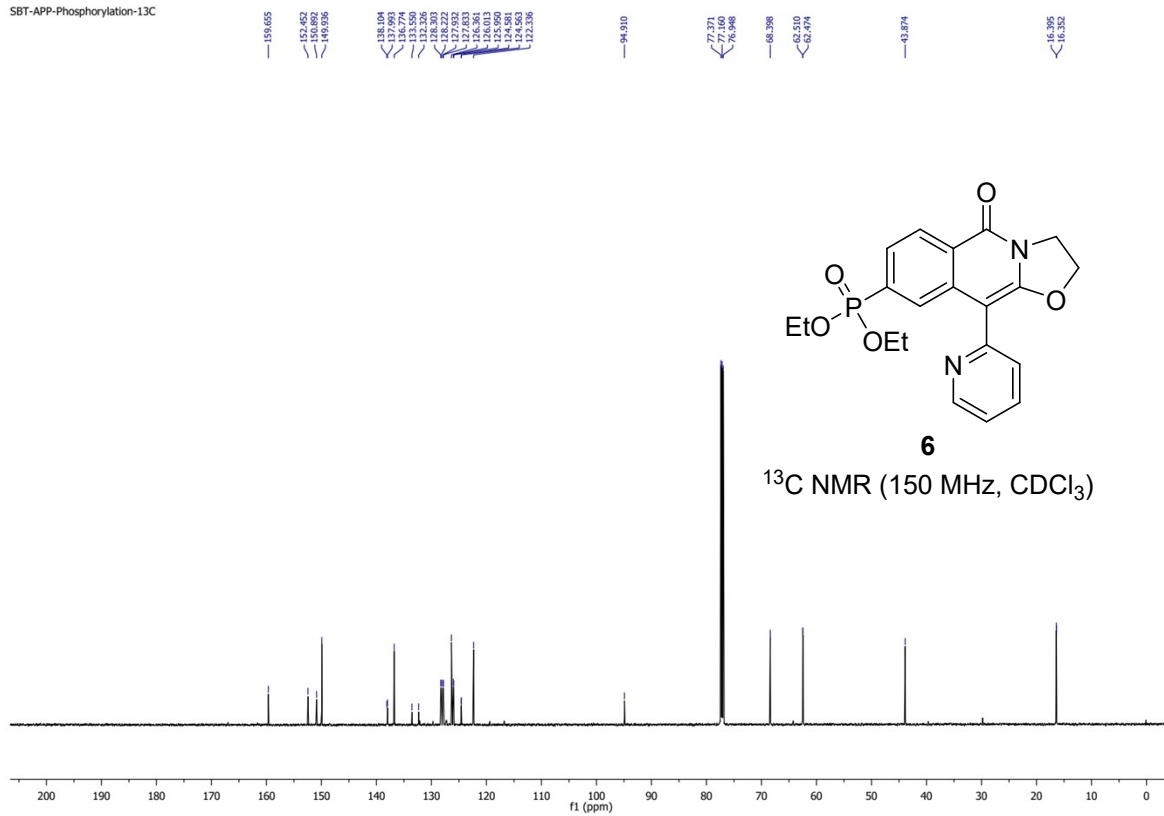

SBT-APP-Phosphorylation-31P

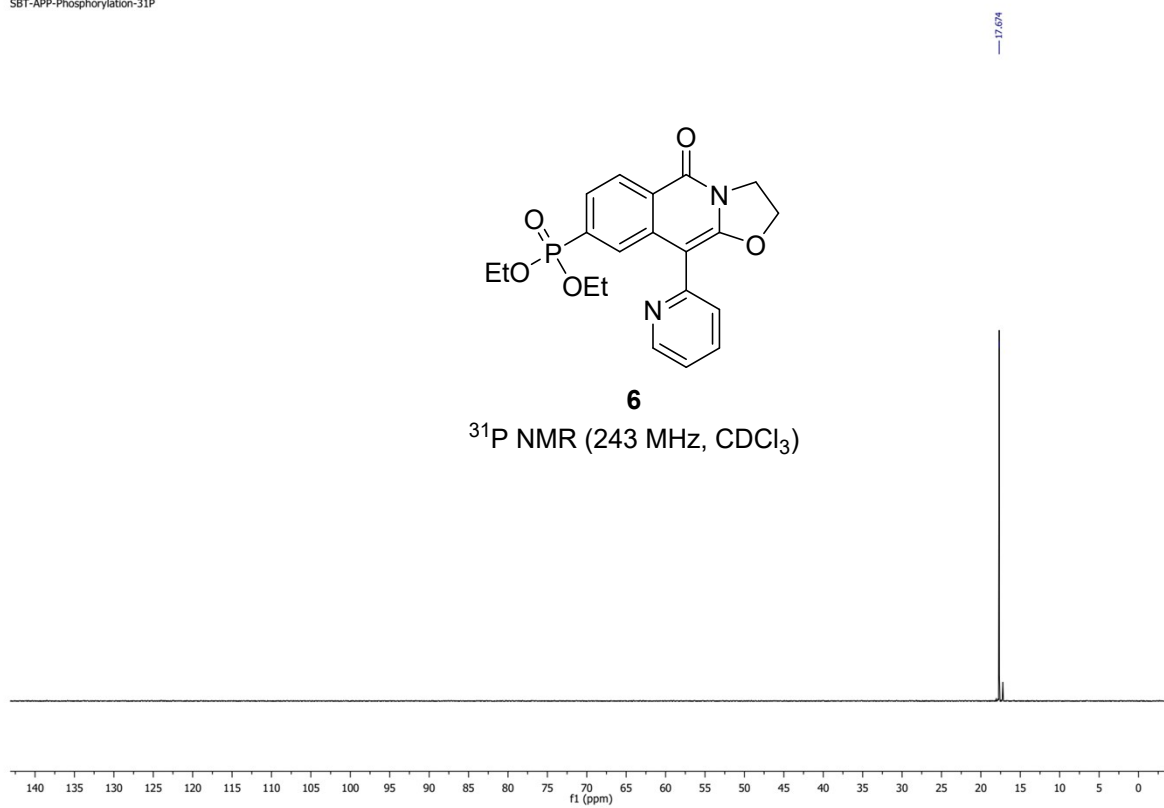

SBT-APP-Borylation-1H

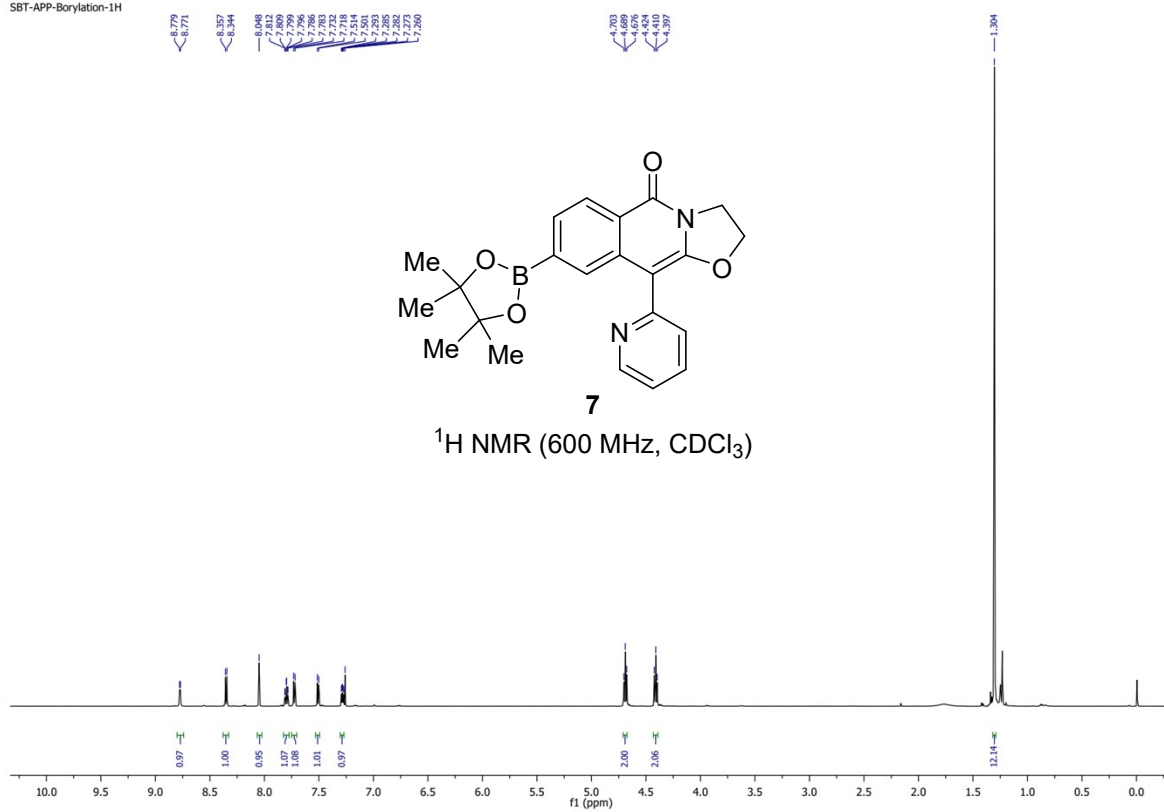

SBT-APP-Borylation-13C

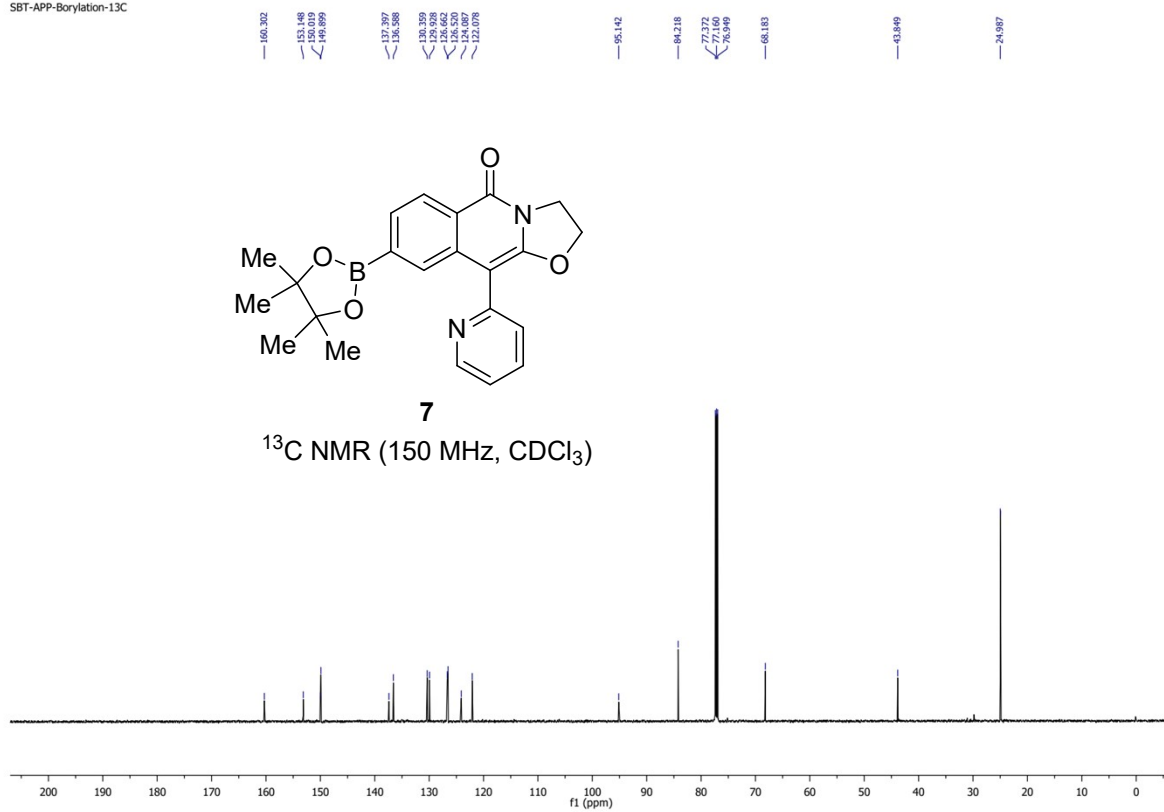

SBT-HDEX-wo-2a-1H

7.942  
7.928  
7.473  
7.463  
7.449  
7.439  
7.397  
7.384  
7.260

4.430  
4.414  
4.002  
3.986

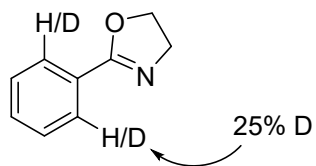

[D<sub>n</sub>]-1a  
<sup>1</sup>H NMR (600 MHz, CDCl<sub>3</sub>)

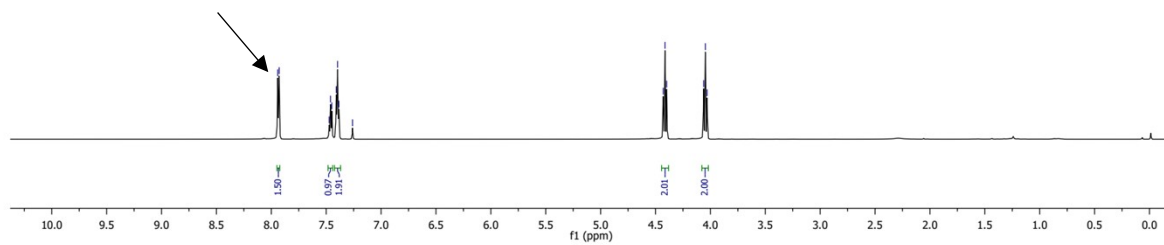

SBT-RSM-HDEX-w-2a-1H

7.650  
7.636  
7.491  
7.467  
7.425  
7.400  
7.260

4.469  
4.453  
4.042  
4.026  
4.009  
4.054

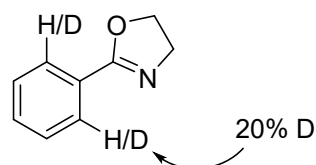

[D<sub>n</sub>]-1a  
<sup>1</sup>H NMR (600 MHz, CDCl<sub>3</sub>)

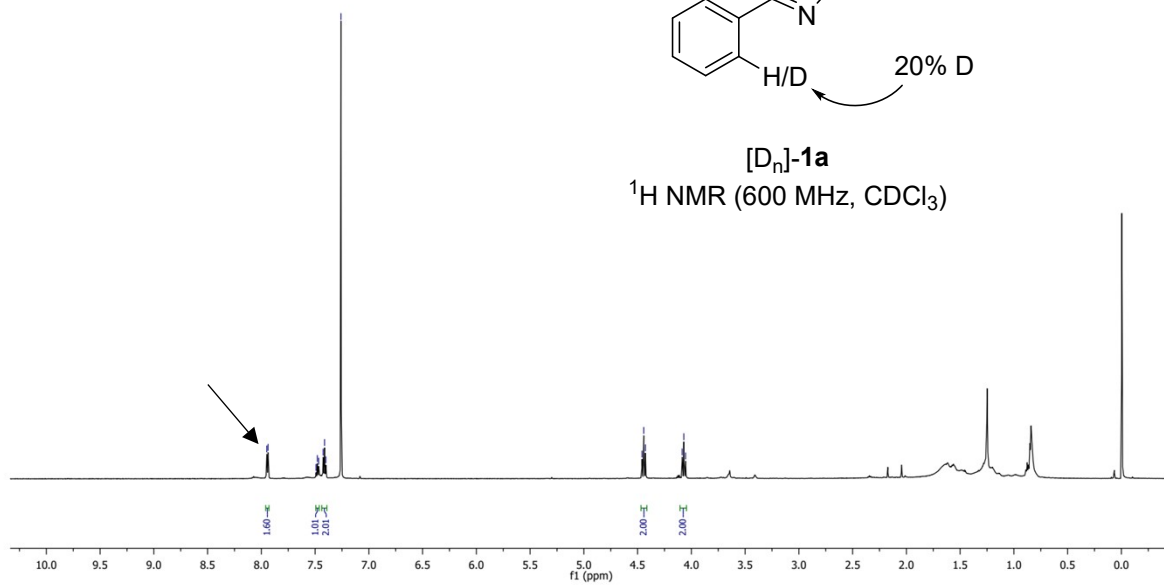



SBT-RP-KIE-PAR-1h-1H

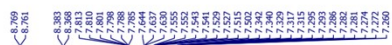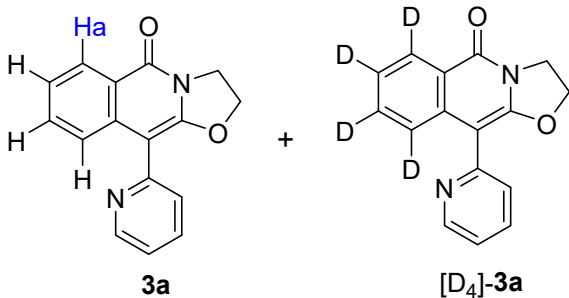

<sup>1</sup>H NMR (600 MHz, CDCl<sub>3</sub>)

**KIE Experiment: 1h**

$k_H/k_D = 2.3$

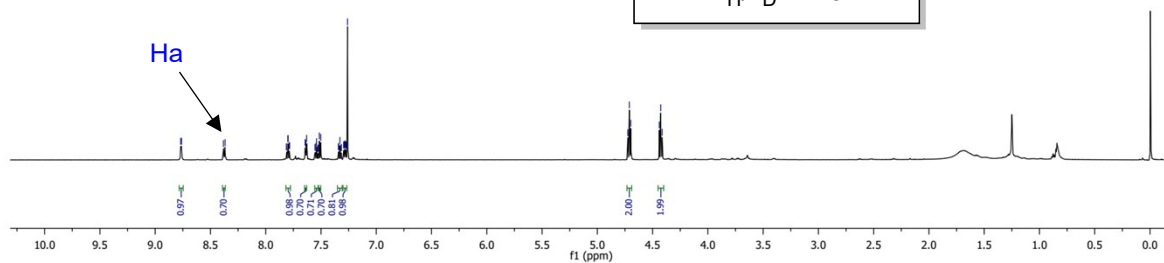

SBT-RP-KIE-PAR-2h-1H

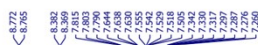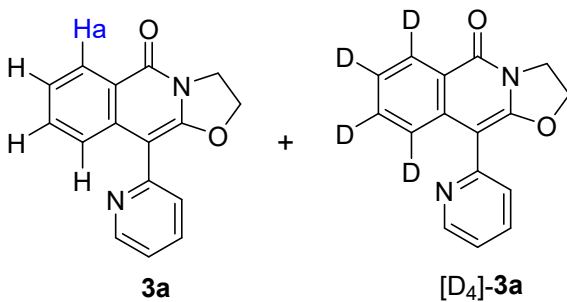

<sup>1</sup>H NMR (600 MHz, CDCl<sub>3</sub>)

**KIE Experiment: 2h**

$k_H/k_D = 2.3$

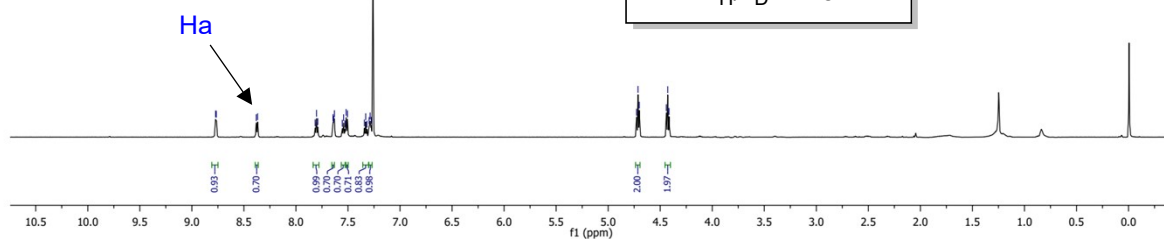



SBT-RP-KIE-PAR-3h-1H

8.767  
8.761  
8.333  
8.329  
7.807  
7.795  
7.792  
7.779  
7.648  
7.634  
7.552  
7.539  
7.527  
7.515  
7.513  
7.500  
7.487  
7.479  
7.476  
7.468  
7.460

4.720  
4.693  
4.437  
4.418  
4.410

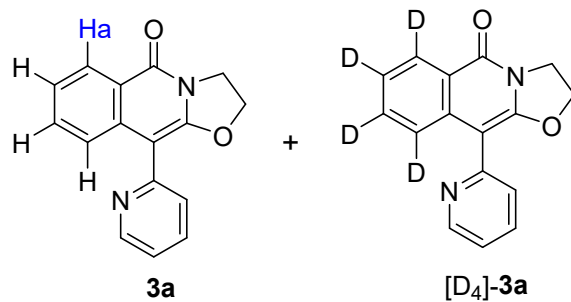

<sup>1</sup>H NMR (600 MHz, CDCl<sub>3</sub>)

**KIE Experiment: 3h**

$k_H/k_D = 2.4$

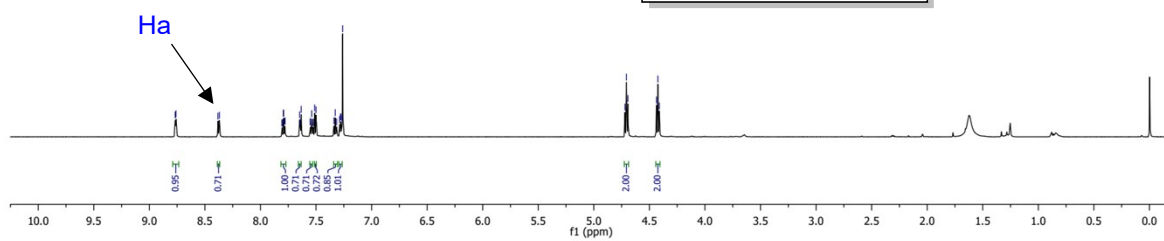

Supplement: d4cc06123c1.pdf [file d4cc06123c1.pdf]
